# Supplementary material for: Comparative Transcriptome Analysis Reveals the Influence of Abscisic Acid on the Metabolism of Pigments, Ascorbic Acid and Folic Acid during Strawberry Fruit Ripening
Source: PLoS One. 2015 Jun 8;10(6):e0130037. doi: 10.1371/journal.pone.0130037 (PMC4460069; doi:10.1371/journal.pone.0130037)
Supplement: S2 Table — (XLS) [file pone.0130037.s005.xls]

## Sheet: Anthocyanins
Sheet 1. All genes identified in anthocyanin biosynthetic pathway.
Gene	Length	Definition	swiss_prot_des	swiss_prot_evalue	nr_des	nr_evalue	Pfam_des	Pfam_evalue	KOG_des	KEGG_des	KEGG_evalue	GO	KO	EC	Pathway
3-deoxy-7-phosphoheptulonate synthase (DAHPS)
comp115126_c0_seq1	345	3-deoxy-7-phosphoheptulonate synthase	sp|P27608|AROF_TOBAC Phospho-2-dehydro-3-deoxyheptonate aldolase 1, chloroplastic OS=Nicotiana tabacum GN=DHAPS-1 PE=1 SV=1	4e-36	gi|112791579|gb|ABI22053.1| 3-deoxy-D-arabino-heptulosonate 7-phosphate synthase 3 [Caragana jubata]	3e-38	Q400R2_LACSA/1-267 Q400R2.1 PF01474.11;DAHP_synth_2;	6e-38	-	ath:AT1G22410	5e-31	GO:0009507(chloroplast);GO:0003849(3-deoxy-7-phosphoheptulonate synthase activity);GO:0009073(aromatic amino acid family biosynthetic process)	K01626	EC:2.5.1.54	ko00400(Phenylalanine, tyrosine and tryptophan biosynthesis)
comp115126_c1_seq7	2256	3-deoxy-7-phosphoheptulonate synthase	sp|P27608|AROF_TOBAC Phospho-2-dehydro-3-deoxyheptonate aldolase 1, chloroplastic OS=Nicotiana tabacum GN=DHAPS-1 PE=1 SV=1	0	gi|470127404|ref|XP_004299659.1| PREDICTED: phospho-2-dehydro-3-deoxyheptonate aldolase 2, chloroplastic-like [Fragaria vesca subsp. vesca]	0	B9GUY5_POPTR/75-512 B9GUY5.1 PF01474.11;DAHP_synth_2;	0	-	vvi:100233115	0	GO:0009507(chloroplast);GO:0003849(3-deoxy-7-phosphoheptulonate synthase activity);GO:0009073(aromatic amino acid family biosynthetic process)	K01626	EC:2.5.1.54	ko00400(Phenylalanine, tyrosine and tryptophan biosynthesis)
comp116471_c0_seq1	2172	3-deoxy-7-phosphoheptulonate synthase	sp|P37822|AROG_SOLTU Phospho-2-dehydro-3-deoxyheptonate aldolase 2, chloroplastic OS=Solanum tuberosum GN=SHKB PE=2 SV=1	0	gi|470103510|ref|XP_004288179.1| PREDICTED: phospho-2-dehydro-3-deoxyheptonate aldolase 2, chloroplastic-like [Fragaria vesca subsp. vesca]	0	B9H4R8_POPTR/76-513 B9H4R8.1 PF01474.11;DAHP_synth_2;	0	-	pop:POPTR_207353	0	GO:0009507(chloroplast);GO:0003849(3-deoxy-7-phosphoheptulonate synthase activity);GO:0009073(aromatic amino acid family biosynthetic process)	K01626	EC:2.5.1.54	ko00400(Phenylalanine, tyrosine and tryptophan biosynthesis)
3-dehydroquinate synthase (DHQS)
comp110438_c0_seq3	1737	3-dehydroquinate synthase	sp|B8GPV3|AROB_THISH 3-dehydroquinate synthase OS=Thioalkalivibrio sp. (strain HL-EbGR7) GN=aroB PE=3 SV=1	3e-148	gi|470102704|ref|XP_004287791.1| PREDICTED: 3-dehydroquinate synthase-like [Fragaria vesca subsp. vesca]	0	Q30D01_FAGSY/162-422 Q30D01.1 PF01761.15;DHQ_synthase;	5e-171	[E] Amino acid transport and metabolism	vvi:100266137	0	GO:0005737(cytoplasm);GO:0003856(3-dehydroquinate synthase activity);GO:0009073(aromatic amino acid family biosynthetic process)	K01735	EC:4.2.3.4	ko00400(Phenylalanine, tyrosine and tryptophan biosynthesis)
comp111341_c1_seq12	1857	-	sp|Q2NI00|DHQS_METST 3-dehydroquinate synthase OS=Methanosphaera stadtmanae (strain DSM 3091) GN=Msp_0090 PE=3 SV=1	2e-72	gi|470132965|ref|XP_004302345.1| PREDICTED: 3-dehydroquinate synthase-like [Fragaria vesca subsp. vesca]	0	F6H5Q8_VITVI/78-428 F6H5Q8.1 PF01959.11;DHQS;	0	-	-	-	GO:0016491(oxidoreductase activity);GO:0009073(aromatic amino acid family biosynthetic process)	-	-	-
comp111341_c1_seq3	1783	-	sp|Q2NI00|DHQS_METST 3-dehydroquinate synthase OS=Methanosphaera stadtmanae (strain DSM 3091) GN=Msp_0090 PE=3 SV=1	1e-72	gi|470132965|ref|XP_004302345.1| PREDICTED: 3-dehydroquinate synthase-like [Fragaria vesca subsp. vesca]	0	F6H5Q8_VITVI/78-428 F6H5Q8.1 PF01959.11;DHQS;	0	-	-	-	GO:0016491(oxidoreductase activity);GO:0009073(aromatic amino acid family biosynthetic process)	-	-	-
3-dehydroquinate dehydratase/shikimate dehydrogenase (DHD/SHD)
comp111594_c0_seq2	1147	-	sp|Q9SQT8|DHQSD_ARATH Bifunctional 3-dehydroquinate dehydratase/shikimate dehydrogenase, chloroplastic OS=Arabidopsis thaliana GN=EMB3004 PE=1 SV=1	2e-80	gi|470103318|ref|XP_004288087.1| PREDICTED: bifunctional 3-dehydroquinate dehydratase/shikimate dehydrogenase, chloroplastic-like [Fragaria vesca subsp. vesca]	2e-102	B9RSY7_RICCO/35-253 B9RSY7.1 PF01487.10;DHquinase_I;	7e-88	[E] Amino acid transport and metabolism	-	-	GO:0009570(chloroplast stroma);GO:0003855(3-dehydroquinate dehydratase activity);GO:0050661(NADP binding);GO:0004764(shikimate 3-dehydrogenase (NADP+) activity);GO:0009073(aromatic amino acid family biosynthetic process);GO:0009793(embryo development ending in seed dormancy);GO:0019632(shikimate metabolic process)	-	-	-
comp111594_c0_seq4	1758	-	sp|Q9SQT8|DHQSD_ARATH Bifunctional 3-dehydroquinate dehydratase/shikimate dehydrogenase, chloroplastic OS=Arabidopsis thaliana GN=EMB3004 PE=1 SV=1	5e-77	gi|470103318|ref|XP_004288087.1| PREDICTED: bifunctional 3-dehydroquinate dehydratase/shikimate dehydrogenase, chloroplastic-like [Fragaria vesca subsp. vesca]	3e-98	B9RSY7_RICCO/35-253 B9RSY7.1 PF01487.10;DHquinase_I;	2e-85	[E] Amino acid transport and metabolism	-	-	GO:0009570(chloroplast stroma);GO:0003855(3-dehydroquinate dehydratase activity);GO:0050661(NADP binding);GO:0004764(shikimate 3-dehydrogenase (NADP+) activity);GO:0009073(aromatic amino acid family biosynthetic process);GO:0009793(embryo development ending in seed dormancy);GO:0019632(shikimate metabolic process)	-	-	-
comp111594_c0_seq9	2099	-	sp|Q9SQT8|DHQSD_ARATH Bifunctional 3-dehydroquinate dehydratase/shikimate dehydrogenase, chloroplastic OS=Arabidopsis thaliana GN=EMB3004 PE=1 SV=1	0	gi|470103318|ref|XP_004288087.1| PREDICTED: bifunctional 3-dehydroquinate dehydratase/shikimate dehydrogenase, chloroplastic-like [Fragaria vesca subsp. vesca]	0	B9RSY7_RICCO/35-253 B9RSY7.1 PF01487.10;DHquinase_I;	3e-118	[E] Amino acid transport and metabolism	-	-	GO:0009570(chloroplast stroma);GO:0003855(3-dehydroquinate dehydratase activity);GO:0050661(NADP binding);GO:0004764(shikimate 3-dehydrogenase (NADP+) activity);GO:0009073(aromatic amino acid family biosynthetic process);GO:0009793(embryo development ending in seed dormancy);GO:0019632(shikimate metabolic process)	-	-	-
comp113286_c0_seq1	329	-	sp|Q9SQT8|DHQSD_ARATH Bifunctional 3-dehydroquinate dehydratase/shikimate dehydrogenase, chloroplastic OS=Arabidopsis thaliana GN=EMB3004 PE=1 SV=1	1e-14	gi|470133240|ref|XP_004302479.1| PREDICTED: bifunctional 3-dehydroquinate dehydratase/shikimate dehydrogenase, chloroplastic-like [Fragaria vesca subsp. vesca]	2e-27	A5ATW1_VITVI/27-123 A5ATW1.1 PF01487.10;DHquinase_I;	5e-17	[E] Amino acid transport and metabolism	-	-	GO:0009570(chloroplast stroma);GO:0003855(3-dehydroquinate dehydratase activity);GO:0050661(NADP binding);GO:0004764(shikimate 3-dehydrogenase (NADP+) activity);GO:0009073(aromatic amino acid family biosynthetic process);GO:0009793(embryo development ending in seed dormancy);GO:0019632(shikimate metabolic process)	-	-	-
comp113286_c0_seq3	2404	-	sp|Q9SQT8|DHQSD_ARATH Bifunctional 3-dehydroquinate dehydratase/shikimate dehydrogenase, chloroplastic OS=Arabidopsis thaliana GN=EMB3004 PE=1 SV=1	0	gi|470133240|ref|XP_004302479.1| PREDICTED: bifunctional 3-dehydroquinate dehydratase/shikimate dehydrogenase, chloroplastic-like [Fragaria vesca subsp. vesca]	0	B9I835_POPTR/17-235 B9I835.1 PF01487.10;DHquinase_I;	3e-114	[E] Amino acid transport and metabolism	-	-	GO:0009570(chloroplast stroma);GO:0003855(3-dehydroquinate dehydratase activity);GO:0050661(NADP binding);GO:0004764(shikimate 3-dehydrogenase (NADP+) activity);GO:0009073(aromatic amino acid family biosynthetic process);GO:0009793(embryo development ending in seed dormancy);GO:0019632(shikimate metabolic process)	-	-	-
comp57606_c0_seq1	394	-	-	-	gi|470133242|ref|XP_004302480.1| PREDICTED: bifunctional 3-dehydroquinate dehydratase/shikimate dehydrogenase, chloroplastic-like [Fragaria vesca subsp. vesca]	5e-35	D7TUX2_VITVI/26-244 D7TUX2.1 PF01487.10;DHquinase_I;	1e-13	-	-	-	-	-	-	-
comp65453_c0_seq1	204	-	sp|Q9SQT8|DHQSD_ARATH Bifunctional 3-dehydroquinate dehydratase/shikimate dehydrogenase, chloroplastic OS=Arabidopsis thaliana GN=EMB3004 PE=1 SV=1	1e-24	gi|470133242|ref|XP_004302480.1| PREDICTED: bifunctional 3-dehydroquinate dehydratase/shikimate dehydrogenase, chloroplastic-like [Fragaria vesca subsp. vesca]	4e-40	B9REY0_RICCO/250-331 B9REY0.1 PF08501.6;Shikimate_dh_N;	4e-31	[E] Amino acid transport and metabolism	-	-	GO:0009570(chloroplast stroma);GO:0003855(3-dehydroquinate dehydratase activity);GO:0050661(NADP binding);GO:0004764(shikimate 3-dehydrogenase (NADP+) activity);GO:0009073(aromatic amino acid family biosynthetic process);GO:0009793(embryo development ending in seed dormancy);GO:0019632(shikimate metabolic process)	-	-	-
comp65453_c1_seq1	408	-	sp|Q9SQT8|DHQSD_ARATH Bifunctional 3-dehydroquinate dehydratase/shikimate dehydrogenase, chloroplastic OS=Arabidopsis thaliana GN=EMB3004 PE=1 SV=1	3e-64	gi|470133242|ref|XP_004302480.1| PREDICTED: bifunctional 3-dehydroquinate dehydratase/shikimate dehydrogenase, chloroplastic-like [Fragaria vesca subsp. vesca]	3e-88	B9REY0_RICCO/19-237 B9REY0.1 PF01487.10;DHquinase_I;	3e-54	[E] Amino acid transport and metabolism	-	-	GO:0009570(chloroplast stroma);GO:0003855(3-dehydroquinate dehydratase activity);GO:0050661(NADP binding);GO:0004764(shikimate 3-dehydrogenase (NADP+) activity);GO:0009073(aromatic amino acid family biosynthetic process);GO:0009793(embryo development ending in seed dormancy);GO:0019632(shikimate metabolic process)	-	-	-
comp67962_c0_seq1	304	-	-	-	gi|470133242|ref|XP_004302480.1| PREDICTED: bifunctional 3-dehydroquinate dehydratase/shikimate dehydrogenase, chloroplastic-like [Fragaria vesca subsp. vesca]	2e-55	D7TUX2_VITVI/26-244 D7TUX2.1 PF01487.10;DHquinase_I;	4e-28	-	-	-	-	-	-	-
comp82071_c0_seq1	263	-	-	-	gi|470133242|ref|XP_004302480.1| PREDICTED: bifunctional 3-dehydroquinate dehydratase/shikimate dehydrogenase, chloroplastic-like [Fragaria vesca subsp. vesca]	2e-24	-	-	-	-	-	-	-	-	-
comp82071_c2_seq1	371	-	sp|Q9SQT8|DHQSD_ARATH Bifunctional 3-dehydroquinate dehydratase/shikimate dehydrogenase, chloroplastic OS=Arabidopsis thaliana GN=EMB3004 PE=1 SV=1	6e-56	gi|470133242|ref|XP_004302480.1| PREDICTED: bifunctional 3-dehydroquinate dehydratase/shikimate dehydrogenase, chloroplastic-like [Fragaria vesca subsp. vesca]	1e-65	B9REY0_RICCO/365-491 B9REY0.1 PF01488.15;Shikimate_DH;	4e-76	[E] Amino acid transport and metabolism	-	-	GO:0009570(chloroplast stroma);GO:0003855(3-dehydroquinate dehydratase activity);GO:0050661(NADP binding);GO:0004764(shikimate 3-dehydrogenase (NADP+) activity);GO:0009073(aromatic amino acid family biosynthetic process);GO:0009793(embryo development ending in seed dormancy);GO:0019632(shikimate metabolic process)	-	-	-
Shikimate kinase (SK)
comp106693_c0_seq12	1020	-	sp|Q9LW20|SKL1_ARATH Probable inactive shikimate kinase like 1, chloroplastic OS=Arabidopsis thaliana GN=SKL1 PE=2 SV=1	1e-21	gi|470137594|ref|XP_004304548.1| PREDICTED: probable inactive shikimate kinase like 1, chloroplastic-like [Fragaria vesca subsp. vesca]	3e-62	B9N0W2_POPTR/100-270 B9N0W2.1 PF01202.17;SKI;	2e-29	-	-	-	-	-	-	-
comp106693_c0_seq13	2814	-	sp|Q9LW20|SKL1_ARATH Probable inactive shikimate kinase like 1, chloroplastic OS=Arabidopsis thaliana GN=SKL1 PE=2 SV=1	6e-70	gi|470137594|ref|XP_004304548.1| PREDICTED: probable inactive shikimate kinase like 1, chloroplastic-like [Fragaria vesca subsp. vesca]	0	B9N0W2_POPTR/100-270 B9N0W2.1 PF01202.17;SKI;	2e-71	-	-	-	-	-	-	-
comp106693_c0_seq16	359	-	-	-	gi|470137594|ref|XP_004304548.1| PREDICTED: probable inactive shikimate kinase like 1, chloroplastic-like [Fragaria vesca subsp. vesca]	4e-52	-	-	-	-	-	-	-	-	-
comp107612_c1_seq2	1493	shikimate kinase	sp|Q9SJ05|SK1_ARATH Shikimate kinase 1, chloroplastic OS=Arabidopsis thaliana GN=SK1 PE=1 SV=2	1e-85	gi|470132734|ref|XP_004302231.1| PREDICTED: shikimate kinase 1, chloroplastic-like [Fragaria vesca subsp. vesca]	0	Q30CZ9_FAGSY/114-290 Q30CZ9.1 PF01202.17;SKI;	2e-95	-	vvi:100262762	3e-115	GO:0009507(chloroplast);GO:0005524(ATP binding);GO:0004765(shikimate kinase activity);GO:0009073(aromatic amino acid family biosynthetic process);GO:0019632(shikimate metabolic process)	K00891	EC:2.7.1.71	ko00400(Phenylalanine, tyrosine and tryptophan biosynthesis)
comp107612_c2_seq1	355	shikimate kinase	sp|Q9SJ05|SK1_ARATH Shikimate kinase 1, chloroplastic OS=Arabidopsis thaliana GN=SK1 PE=1 SV=2	1e-31	gi|470132734|ref|XP_004302231.1| PREDICTED: shikimate kinase 1, chloroplastic-like [Fragaria vesca subsp. vesca]	6e-58	Q30CZ9_FAGSY/114-290 Q30CZ9.1 PF01202.17;SKI;	2e-47	-	vvi:100262762	3e-41	GO:0009507(chloroplast);GO:0005524(ATP binding);GO:0004765(shikimate kinase activity);GO:0009073(aromatic amino acid family biosynthetic process);GO:0019632(shikimate metabolic process)	K00891	EC:2.7.1.71	ko00400(Phenylalanine, tyrosine and tryptophan biosynthesis)
comp90882_c0_seq1	840	-	sp|O82290|SKL2_ARATH Probable inactive shikimate kinase like 2, chloroplastic OS=Arabidopsis thaliana GN=SKL2 PE=2 SV=2	1e-64	gi|470107987|ref|XP_004290317.1| PREDICTED: probable inactive shikimate kinase like 2, chloroplastic-like [Fragaria vesca subsp. vesca]	7e-90	B9GZJ5_POPTR/78-158 B9GZJ5.1 PF04969.11;CS;	1e-34	-	-	-	-	-	-	-
comp97177_c0_seq1	1421	-	sp|O82290|SKL2_ARATH Probable inactive shikimate kinase like 2, chloroplastic OS=Arabidopsis thaliana GN=SKL2 PE=2 SV=2	1e-151	gi|470107987|ref|XP_004290317.1| PREDICTED: probable inactive shikimate kinase like 2, chloroplastic-like [Fragaria vesca subsp. vesca]	0	B9GZJ5_POPTR/199-341 B9GZJ5.1 PF01202.17;SKI;	6e-63	-	-	-	-	-	-	-
5-enolpyruvylshikimate-3-phosphate synthase (EPSPS)
comp113558_c0_seq1	2318	3-phosphoshikimate 1-carboxyvinyltransferase	sp|P11043|AROA_PETHY 3-phosphoshikimate 1-carboxyvinyltransferase, chloroplastic OS=Petunia hybrida PE=1 SV=1	0	gi|470142474|ref|XP_004306932.1| PREDICTED: 3-phosphoshikimate 1-carboxyvinyltransferase, chloroplastic-like [Fragaria vesca subsp. vesca]	0	Q1M157_CAMAC/82-513 Q1M157.1 PF00275.15;EPSP_synthase;	0	[E] Amino acid transport and metabolism	vvi:100232912	0	GO:0009507(chloroplast);GO:0003866(3-phosphoshikimate 1-carboxyvinyltransferase activity);GO:0009073(aromatic amino acid family biosynthetic process);GO:0009635(response to herbicide)	K00800	EC:2.5.1.19	ko00400(Phenylalanine, tyrosine and tryptophan biosynthesis)
chorismate synthase (CS)
comp107579_c0_seq1	2052	chorismate synthase	sp|P57720|AROC_ARATH Chorismate synthase, chloroplastic OS=Arabidopsis thaliana GN=EMB1144 PE=2 SV=2	0	gi|470143460|ref|XP_004307393.1| PREDICTED: chorismate synthase, chloroplastic-like [Fragaria vesca subsp. vesca]	0	Q30CZ7_FAGSY/56-404 Q30CZ7.1 PF01264.16;Chorismate_synt;	0	[E] Amino acid transport and metabolism	pop:POPTR_724971	0	GO:0009507(chloroplast);GO:0005730(nucleolus);GO:0004107(chorismate synthase activity);GO:0009073(aromatic amino acid family biosynthetic process)	K01736	EC:4.2.3.5	ko00400(Phenylalanine, tyrosine and tryptophan biosynthesis)
comp112830_c0_seq27	1264	-	sp|P57720|AROC_ARATH Chorismate synthase, chloroplastic OS=Arabidopsis thaliana GN=EMB1144 PE=2 SV=2	1e-50	gi|449464390|ref|XP_004149912.1| PREDICTED: chorismate synthase, chloroplastic-like [Cucumis sativus] gi|449505691|ref|XP_004162542.1| PREDICTED: chorismate synthase, chloroplastic-like [Cucumis sativus]	2e-48	A9PGP7_POPTR/59-407 A9PGP7.1 PF01264.16;Chorismate_synt;	5e-53	[E] Amino acid transport and metabolism	-	-	GO:0009507(chloroplast);GO:0005730(nucleolus);GO:0004107(chorismate synthase activity);GO:0009073(aromatic amino acid family biosynthetic process)	-	-	-
comp112830_c0_seq3	1289	-	sp|P57720|AROC_ARATH Chorismate synthase, chloroplastic OS=Arabidopsis thaliana GN=EMB1144 PE=2 SV=2	2e-50	gi|449464390|ref|XP_004149912.1| PREDICTED: chorismate synthase, chloroplastic-like [Cucumis sativus] gi|449505691|ref|XP_004162542.1| PREDICTED: chorismate synthase, chloroplastic-like [Cucumis sativus]	2e-48	A9PGP7_POPTR/59-407 A9PGP7.1 PF01264.16;Chorismate_synt;	7e-53	[E] Amino acid transport and metabolism	-	-	GO:0009507(chloroplast);GO:0005730(nucleolus);GO:0004107(chorismate synthase activity);GO:0009073(aromatic amino acid family biosynthetic process)	-	-	-
comp112830_c0_seq44	1361	-	sp|P57720|AROC_ARATH Chorismate synthase, chloroplastic OS=Arabidopsis thaliana GN=EMB1144 PE=2 SV=2	3e-50	gi|449464390|ref|XP_004149912.1| PREDICTED: chorismate synthase, chloroplastic-like [Cucumis sativus] gi|449505691|ref|XP_004162542.1| PREDICTED: chorismate synthase, chloroplastic-like [Cucumis sativus]	2e-48	A9PGP7_POPTR/59-407 A9PGP7.1 PF01264.16;Chorismate_synt;	1e-52	[E] Amino acid transport and metabolism	-	-	GO:0009507(chloroplast);GO:0005730(nucleolus);GO:0004107(chorismate synthase activity);GO:0009073(aromatic amino acid family biosynthetic process)	-	-	-
comp112830_c0_seq46	1365	-	sp|P57720|AROC_ARATH Chorismate synthase, chloroplastic OS=Arabidopsis thaliana GN=EMB1144 PE=2 SV=2	1e-67	gi|470143460|ref|XP_004307393.1| PREDICTED: chorismate synthase, chloroplastic-like [Fragaria vesca subsp. vesca]	6e-73	A9PGP7_POPTR/59-407 A9PGP7.1 PF01264.16;Chorismate_synt;	2e-64	[E] Amino acid transport and metabolism	-	-	GO:0009507(chloroplast);GO:0005730(nucleolus);GO:0004107(chorismate synthase activity);GO:0009073(aromatic amino acid family biosynthetic process)	-	-	-
comp112830_c0_seq62	1340	-	sp|P57720|AROC_ARATH Chorismate synthase, chloroplastic OS=Arabidopsis thaliana GN=EMB1144 PE=2 SV=2	1e-67	gi|470143460|ref|XP_004307393.1| PREDICTED: chorismate synthase, chloroplastic-like [Fragaria vesca subsp. vesca]	6e-73	A9PGP7_POPTR/59-407 A9PGP7.1 PF01264.16;Chorismate_synt;	2e-64	[E] Amino acid transport and metabolism	-	-	GO:0009507(chloroplast);GO:0005730(nucleolus);GO:0004107(chorismate synthase activity);GO:0009073(aromatic amino acid family biosynthetic process)	-	-	-
comp87388_c1_seq1	1039	chorismate synthase	sp|P57720|AROC_ARATH Chorismate synthase, chloroplastic OS=Arabidopsis thaliana GN=EMB1144 PE=2 SV=2	2e-78	gi|462414471|gb|EMJ19208.1| hypothetical protein PRUPE_ppa005795mg [Prunus persica]	2e-82	A9PGP7_POPTR/59-407 A9PGP7.1 PF01264.16;Chorismate_synt;	1e-66	[E] Amino acid transport and metabolism	pop:POPTR_724971	1e-81	GO:0009507(chloroplast);GO:0005730(nucleolus);GO:0004107(chorismate synthase activity);GO:0009073(aromatic amino acid family biosynthetic process)	K01736	EC:4.2.3.5	ko00400(Phenylalanine, tyrosine and tryptophan biosynthesis)
chorismate mutase (CM)
comp110932_c0_seq11	525	chorismate mutase		3e-25	gi|470136994|ref|XP_004304265.1| PREDICTED: chorismate mutase, chloroplastic-like [Fragaria vesca subsp. vesca]	8e-37	-	-	[E] Amino acid transport and metabolism	ath:AT3G29200	4e-21	GO:0009507(chloroplast);GO:0005829(cytosol);GO:0004106(chorismate mutase activity);GO:0009073(aromatic amino acid family biosynthetic process)	K01850	EC:5.4.99.5	ko00400(Phenylalanine, tyrosine and tryptophan biosynthesis)
comp113505_c1_seq5	1595	chorismate mutase		2e-136	gi|470136994|ref|XP_004304265.1| PREDICTED: chorismate mutase, chloroplastic-like [Fragaria vesca subsp. vesca]	7e-168	D2CSU4_PETHY/83-150 D2CSU4.1 PF01817.16;CM_2;	1e-33	[E] Amino acid transport and metabolism	ath:AT3G29200	2e-110	GO:0009507(chloroplast);GO:0005829(cytosol);GO:0004106(chorismate mutase activity);GO:0009073(aromatic amino acid family biosynthetic process)	K01850	EC:5.4.99.5	ko00400(Phenylalanine, tyrosine and tryptophan biosynthesis)
comp47240_c0_seq1	385	-		4e-40	gi|470124810|ref|XP_004298402.1| PREDICTED: chorismate mutase, chloroplastic-like [Fragaria vesca subsp. vesca]	1e-43	-	-	[E] Amino acid transport and metabolism	-	-	GO:0009507(chloroplast);GO:0005829(cytosol);GO:0004106(chorismate mutase activity);GO:0009073(aromatic amino acid family biosynthetic process)	-	-	-
Phenylalanine ammonia lyase (PAL)
comp105622_c0_seq2	2557	-	sp|O64963|PAL1_PRUAV Phenylalanine ammonia-lyase 1 OS=Prunus avium GN=PAL1 PE=2 SV=1	0	gi|7208616|gb|AAF40224.1|AF237955_1 phenylalanine ammonia-lyase 2 [Rubus idaeus]	0	E0D6R6_9ASTR/64-562 E0D6R6.1 PF00221.14;Lyase_aromatic;	0	[Q] Secondary metabolites biosynthesis, transport and catabolism	-	-	GO:0005737(cytoplasm);GO:0016841(ammonia-lyase activity);GO:0009058(biosynthetic process);GO:0006559(L-phenylalanine catabolic process);GO:0009698(phenylpropanoid metabolic process)	-	-	-
comp109063_c0_seq1	2845	-	sp|Q9M568|PAL1_RUBID Phenylalanine ammonia-lyase 1 OS=Rubus idaeus GN=PAL1 PE=2 SV=1	0	gi|312176767|gb|ADQ39192.1| phenylalanine ammonia lyase 6 [Fragaria x ananassa]	0	F8RL28_FRAAN/60-556 F8RL28.1 PF00221.14;Lyase_aromatic;	0	[Q] Secondary metabolites biosynthesis, transport and catabolism	-	-	GO:0005737(cytoplasm);GO:0016841(ammonia-lyase activity);GO:0009058(biosynthetic process);GO:0006559(L-phenylalanine catabolic process);GO:0009698(phenylpropanoid metabolic process)	-	-	-
comp109367_c0_seq10	345	-	sp|Q9M568|PAL1_RUBID Phenylalanine ammonia-lyase 1 OS=Rubus idaeus GN=PAL1 PE=2 SV=1	7e-17	gi|312176767|gb|ADQ39192.1| phenylalanine ammonia lyase 6 [Fragaria x ananassa]	4e-27	-	-	[Q] Secondary metabolites biosynthesis, transport and catabolism	-	-	GO:0005737(cytoplasm);GO:0016841(ammonia-lyase activity);GO:0009058(biosynthetic process);GO:0006559(L-phenylalanine catabolic process);GO:0009698(phenylpropanoid metabolic process)	-	-	-
comp109367_c0_seq2	428	-	sp|Q9M568|PAL1_RUBID Phenylalanine ammonia-lyase 1 OS=Rubus idaeus GN=PAL1 PE=2 SV=1	4e-47	gi|310894078|gb|ADP37942.1| phenylalanine ammonia-lyase [Fragaria chiloensis]	2e-60	F8RL28_FRAAN/60-556 F8RL28.1 PF00221.14;Lyase_aromatic;	6e-57	[Q] Secondary metabolites biosynthesis, transport and catabolism	-	-	GO:0005737(cytoplasm);GO:0016841(ammonia-lyase activity);GO:0009058(biosynthetic process);GO:0006559(L-phenylalanine catabolic process);GO:0009698(phenylpropanoid metabolic process)	-	-	-
cinnamate 4-hydroxylase (C4H)
comp106234_c0_seq1	1727	-	sp|Q43054|TCMO_POPKI Trans-cinnamate 4-monooxygenase OS=Populus kitakamiensis GN=CYP73A16 PE=2 SV=1	0	gi|470117149|ref|XP_004294725.1| PREDICTED: trans-cinnamate 4-monooxygenase-like [Fragaria vesca subsp. vesca]	0	A1XEL3_TOBAC/34-499 A1XEL3.1 PF00067.17;p450;	0	[Q] Secondary metabolites biosynthesis, transport and catabolism	-	-	GO:0009055(electron carrier activity);GO:0020037(heme binding);GO:0016710(trans-cinnamate 4-monooxygenase activity)	-	-	-
comp131631_c0_seq1	296	-	sp|P48522|TCMO_CATRO Trans-cinnamate 4-monooxygenase OS=Catharanthus roseus GN=CYP73A4 PE=2 SV=1	5e-12	gi|470127623|ref|XP_004299767.1| PREDICTED: trans-cinnamate 4-monooxygenase-like [Fragaria vesca subsp. vesca]	1e-17	Q9ZSR0_MESCR/68-539 Q9ZSR0.1 PF00067.17;p450;	4e-16	-	-	-	GO:0009055(electron carrier activity);GO:0020037(heme binding);GO:0016710(trans-cinnamate 4-monooxygenase activity)	-	-	-
comp135700_c0_seq1	204	-	sp|P92994|TCMO_ARATH Trans-cinnamate 4-monooxygenase OS=Arabidopsis thaliana GN=CYP73A5 PE=2 SV=1	3e-22	gi|508784902|gb|EOY32158.1| Trans-cinnamate 4-monooxygenase [Theobroma cacao]	1e-32	Q7DLU3_PHAVU/1-355 Q7DLU3.1 PF00067.17;p450;	2e-39	[Q] Secondary metabolites biosynthesis, transport and catabolism	-	-	GO:0005783(endoplasmic reticulum);GO:0016021(integral to membrane);GO:0009505(plant-type cell wall);GO:0005886(plasma membrane);GO:0009506(plasmodesma);GO:0005774(vacuolar membrane);GO:0009055(electron carrier activity);GO:0020037(heme binding);GO:0016710(trans-cinnamate 4-monooxygenase activity);GO:0040007(growth);GO:0009808(lignin metabolic process);GO:0009555(pollen development);GO:0080167(res…	-	-	-
comp34082_c0_seq1	276	-	sp|P37114|TCMO_MEDSA Trans-cinnamate 4-monooxygenase OS=Medicago sativa GN=CYP73A3 PE=2 SV=1	7e-40	gi|508784902|gb|EOY32158.1| Trans-cinnamate 4-monooxygenase [Theobroma cacao]	6e-46	H2DH22_PANGI/61-524 H2DH22.1 PF00067.17;p450;	6e-46	[Q] Secondary metabolites biosynthesis, transport and catabolism	-	-	GO:0009055(electron carrier activity);GO:0020037(heme binding);GO:0016710(trans-cinnamate 4-monooxygenase activity)	-	-	-
p-coumarate ligase (4CL)
comp106520_c0_seq1	1928	4-coumarate--CoA ligase	sp|O24146|4CL2_TOBAC 4-coumarate--CoA ligase 2 OS=Nicotiana tabacum GN=4CL2 PE=2 SV=1	0	gi|470148826|ref|XP_004309949.1| PREDICTED: 4-coumarate--CoA ligase 1-like [Fragaria vesca subsp. vesca]	0	D5LNB5_SORAU/31-448 D5LNB5.1 PF00501.23;AMP-binding;	0	[I] Lipid transport and metabolism	pop:POPTR_827715	0	GO:0016207(4-coumarate-CoA ligase activity);GO:0005524(ATP binding);GO:0009698(phenylpropanoid metabolic process)	K01904	EC:6.2.1.12	ko00130(Ubiquinone and other terpenoid-quinone biosynthesis);ko00360(Phenylalanine metabolism);ko00940(Phenylpropanoid biosynthesis)
comp113055_c0_seq3	2318	4-coumarate--CoA ligase	sp|P31687|4CL2_SOYBN 4-coumarate--CoA ligase 2 OS=Glycine max PE=2 SV=2	0	gi|470144438|ref|XP_004307864.1| PREDICTED: LOW QUALITY PROTEIN: 4-coumarate--CoA ligase 2-like [Fragaria vesca subsp. vesca]	0	Q9LL51_RUBID/76-485 Q9LL51.1 PF00501.23;AMP-binding;	0	[I] Lipid transport and metabolism	vvi:100245991	0	GO:0016207(4-coumarate-CoA ligase activity);GO:0005524(ATP binding);GO:0009698(phenylpropanoid metabolic process)	K01904	EC:6.2.1.12	ko00130(Ubiquinone and other terpenoid-quinone biosynthesis);ko00360(Phenylalanine metabolism);ko00940(Phenylpropanoid biosynthesis)
comp116778_c1_seq6	2278	4-coumarate--CoA ligase	sp|P31687|4CL2_SOYBN 4-coumarate--CoA ligase 2 OS=Glycine max PE=2 SV=2	0	gi|470144438|ref|XP_004307864.1| PREDICTED: LOW QUALITY PROTEIN: 4-coumarate--CoA ligase 2-like [Fragaria vesca subsp. vesca]	0	Q9LL51_RUBID/76-485 Q9LL51.1 PF00501.23;AMP-binding;	0	[I] Lipid transport and metabolism	vvi:100245991	0	GO:0016207(4-coumarate-CoA ligase activity);GO:0005524(ATP binding);GO:0009698(phenylpropanoid metabolic process)	K01904	EC:6.2.1.12	ko00130(Ubiquinone and other terpenoid-quinone biosynthesis);ko00360(Phenylalanine metabolism);ko00940(Phenylpropanoid biosynthesis)
comp101847_c1_seq1	2218	-	sp|Q84P24|4CLL6_ARATH 4-coumarate--CoA ligase-like 6 OS=Arabidopsis thaliana GN=4CLL6 PE=2 SV=2	0	gi|470131523|ref|XP_004301643.1| PREDICTED: 4-coumarate--CoA ligase-like 6-like [Fragaria vesca subsp. vesca]	0	I1J4L4_SOYBN/47-456 I1J4L4.1 PF00501.23;AMP-binding;	0	[I] Lipid transport and metabolism	-	-	GO:0005777(peroxisome);GO:0005524(ATP binding);GO:0016874(ligase activity)	-	-	-
comp103633_c1_seq14	1635	-	sp|O24146|4CL2_TOBAC 4-coumarate--CoA ligase 2 OS=Nicotiana tabacum GN=4CL2 PE=2 SV=1	0	gi|470134772|ref|XP_004303212.1| PREDICTED: 4-coumarate--CoA ligase 1-like [Fragaria vesca subsp. vesca]	0	C0KKW5_HUMLU/35-450 C0KKW5.1 PF00501.23;AMP-binding;	0	[I] Lipid transport and metabolism	-	-	GO:0016207(4-coumarate-CoA ligase activity);GO:0005524(ATP binding);GO:0009698(phenylpropanoid metabolic process)	-	-	-
comp106727_c0_seq5	1998	OPC-8:0 CoA ligase 1	sp|Q84P21|4CLL5_ARATH 4-coumarate--CoA ligase-like 5 OS=Arabidopsis thaliana GN=4CLL5 PE=1 SV=2	0	gi|470113415|ref|XP_004292919.1| PREDICTED: 4-coumarate--CoA ligase-like 5-like [Fragaria vesca subsp. vesca]	0	B9R8J7_RICCO/42-452 B9R8J7.1 PF00501.23;AMP-binding;	0	[I] Lipid transport and metabolism	ath:AT1G20510	0	GO:0005777(peroxisome);GO:0005524(ATP binding);GO:0016874(ligase activity);GO:0009695(jasmonic acid biosynthetic process);GO:0009611(response to wounding)	K10526	EC:6.2.1.-	ko00592(alpha-Linolenic acid metabolism)
comp108249_c0_seq1	2084	-	sp|Q84P23|4CLL9_ARATH 4-coumarate--CoA ligase-like 9 OS=Arabidopsis thaliana GN=4CLL9 PE=1 SV=2	6e-175	gi|470123051|ref|XP_004297550.1| PREDICTED: 4-coumarate--CoA ligase-like 9-like [Fragaria vesca subsp. vesca]	0	B9I3N0_POPTR/47-449 B9I3N0.1 PF00501.23;AMP-binding;	3e-178	[I] Lipid transport and metabolism	-	-	GO:0005777(peroxisome);GO:0005524(ATP binding);GO:0004321(fatty-acyl-CoA synthase activity);GO:0016874(ligase activity);GO:0009695(jasmonic acid biosynthetic process)	-	-	-
comp108549_c0_seq2	626	-	sp|O24146|4CL2_TOBAC 4-coumarate--CoA ligase 2 OS=Nicotiana tabacum GN=4CL2 PE=2 SV=1	5e-84	gi|470134772|ref|XP_004303212.1| PREDICTED: 4-coumarate--CoA ligase 1-like [Fragaria vesca subsp. vesca]	2e-128	B9T4L7_RICCO/40-458 B9T4L7.1 PF00501.23;AMP-binding;	3e-108	[I] Lipid transport and metabolism	-	-	GO:0016207(4-coumarate-CoA ligase activity);GO:0005524(ATP binding);GO:0009698(phenylpropanoid metabolic process)	-	-	-
comp116561_c0_seq5	592	-	sp|Q9SMT7|4CLLA_ARATH 4-coumarate--CoA ligase-like 10 OS=Arabidopsis thaliana GN=4CLL10 PE=2 SV=1	7e-31	gi|470125503|ref|XP_004298741.1| PREDICTED: 4-coumarate--CoA ligase-like 10-like [Fragaria vesca subsp. vesca]	6e-47	Q49LX7_SOLCI/111-186 Q49LX7.1 PF13193.1;AMP-binding_C;	8e-28	[I] Lipid transport and metabolism	-	-	-	-	-	-
comp117227_c0_seq1	1893	-	sp|Q9SMT7|4CLLA_ARATH 4-coumarate--CoA ligase-like 10 OS=Arabidopsis thaliana GN=4CLL10 PE=2 SV=1	0	gi|470125503|ref|XP_004298741.1| PREDICTED: 4-coumarate--CoA ligase-like 10-like [Fragaria vesca subsp. vesca]	0	D7TW09_VITVI/12-418 D7TW09.1 PF00501.23;AMP-binding;	0	[I] Lipid transport and metabolism	-	-	-	-	-	-
comp134756_c0_seq1	262	-	-	-	gi|470145819|ref|XP_004308531.1| PREDICTED: 4-coumarate--CoA ligase-like 5-like [Fragaria vesca subsp. vesca]	2e-22	-	-	-	-	-	-	-	-	-
comp28244_c0_seq1	563	-	sp|Q84P23|4CLL9_ARATH 4-coumarate--CoA ligase-like 9 OS=Arabidopsis thaliana GN=4CLL9 PE=1 SV=2	4e-76	gi|470149346|ref|XP_004310199.1| PREDICTED: 4-coumarate--CoA ligase-like 9-like [Fragaria vesca subsp. vesca]	1e-102	B9HTA5_POPTR/53-451 B9HTA5.1 PF00501.23;AMP-binding;	2e-55	[I] Lipid transport and metabolism	-	-	GO:0005777(peroxisome);GO:0005524(ATP binding);GO:0004321(fatty-acyl-CoA synthase activity);GO:0016874(ligase activity);GO:0009695(jasmonic acid biosynthetic process)	-	-	-
comp80191_c0_seq1	208	-	-	-	gi|470149346|ref|XP_004310199.1| PREDICTED: 4-coumarate--CoA ligase-like 9-like [Fragaria vesca subsp. vesca]	4e-25	-	-	-	-	-	-	-	-	-
comp80191_c1_seq1	220	-	-	-	gi|470149346|ref|XP_004310199.1| PREDICTED: 4-coumarate--CoA ligase-like 9-like [Fragaria vesca subsp. vesca]	1e-33	D7TAQ2_VITVI/51-448 D7TAQ2.1 PF00501.23;AMP-binding;	3e-27	-	-	-	-	-	-	-
comp91066_c0_seq1	298	-	sp|P31685|4CL2_SOLTU 4-coumarate--CoA ligase 2 OS=Solanum tuberosum GN=4CL2 PE=3 SV=1	1e-30	gi|470134772|ref|XP_004303212.1| PREDICTED: 4-coumarate--CoA ligase 1-like [Fragaria vesca subsp. vesca]	1e-41	B9RGS2_RICCO/33-445 B9RGS2.1 PF00501.23;AMP-binding;	4e-21	[I] Lipid transport and metabolism	-	-	GO:0016207(4-coumarate-CoA ligase activity);GO:0005524(ATP binding);GO:0009698(phenylpropanoid metabolic process)	-	-	-
comp97637_c0_seq1	2566	-	sp|Q9M0X9|4CLL7_ARATH 4-coumarate--CoA ligase-like 7 OS=Arabidopsis thaliana GN=4CLL7 PE=1 SV=1	7e-167	gi|470137418|ref|XP_004304462.1| PREDICTED: 4-coumarate--CoA ligase-like 7-like [Fragaria vesca subsp. vesca]	0	B9S0G8_RICCO/35-446 B9S0G8.1 PF00501.23;AMP-binding;	1e-179	[I] Lipid transport and metabolism	-	-	GO:0005777(peroxisome);GO:0005524(ATP binding);GO:0004321(fatty-acyl-CoA synthase activity);GO:0016874(ligase activity);GO:0009695(jasmonic acid biosynthetic process)	-	-	-
comp97637_c0_seq3	2292	-	sp|Q9M0X9|4CLL7_ARATH 4-coumarate--CoA ligase-like 7 OS=Arabidopsis thaliana GN=4CLL7 PE=1 SV=1	0	gi|470137418|ref|XP_004304462.1| PREDICTED: 4-coumarate--CoA ligase-like 7-like [Fragaria vesca subsp. vesca]	0	B9S0G8_RICCO/35-446 B9S0G8.1 PF00501.23;AMP-binding;	0	[I] Lipid transport and metabolism	-	-	GO:0005777(peroxisome);GO:0005524(ATP binding);GO:0004321(fatty-acyl-CoA synthase activity);GO:0016874(ligase activity);GO:0009695(jasmonic acid biosynthetic process)	-	-	-
comp97637_c0_seq5	2333	-	sp|Q9M0X9|4CLL7_ARATH 4-coumarate--CoA ligase-like 7 OS=Arabidopsis thaliana GN=4CLL7 PE=1 SV=1	0	gi|470110788|ref|XP_004291645.1| PREDICTED: 4-coumarate--CoA ligase-like 7-like [Fragaria vesca subsp. vesca]	0	H9A1V5_CANSA/33-446 H9A1V5.1 PF00501.23;AMP-binding;	0	[I] Lipid transport and metabolism	-	-	GO:0005777(peroxisome);GO:0005524(ATP binding);GO:0004321(fatty-acyl-CoA synthase activity);GO:0016874(ligase activity);GO:0009695(jasmonic acid biosynthetic process)	-	-	-
comp99227_c1_seq17	2635	-	sp|Q9M0X9|4CLL7_ARATH 4-coumarate--CoA ligase-like 7 OS=Arabidopsis thaliana GN=4CLL7 PE=1 SV=1	6e-136	gi|470137418|ref|XP_004304462.1| PREDICTED: 4-coumarate--CoA ligase-like 7-like [Fragaria vesca subsp. vesca]	0	B9S0G8_RICCO/35-446 B9S0G8.1 PF00501.23;AMP-binding;	6e-150	[I] Lipid transport and metabolism	-	-	GO:0005777(peroxisome);GO:0005524(ATP binding);GO:0004321(fatty-acyl-CoA synthase activity);GO:0016874(ligase activity);GO:0009695(jasmonic acid biosynthetic process)	-	-	-
comp99227_c1_seq18	2361	-	sp|Q9M0X9|4CLL7_ARATH 4-coumarate--CoA ligase-like 7 OS=Arabidopsis thaliana GN=4CLL7 PE=1 SV=1	5e-137	gi|470137418|ref|XP_004304462.1| PREDICTED: 4-coumarate--CoA ligase-like 7-like [Fragaria vesca subsp. vesca]	0	B9S0G8_RICCO/35-446 B9S0G8.1 PF00501.23;AMP-binding;	5e-151	[I] Lipid transport and metabolism	-	-	GO:0005777(peroxisome);GO:0005524(ATP binding);GO:0004321(fatty-acyl-CoA synthase activity);GO:0016874(ligase activity);GO:0009695(jasmonic acid biosynthetic process)	-	-	-
comp99227_c1_seq3	2552	-	sp|Q9M0X9|4CLL7_ARATH 4-coumarate--CoA ligase-like 7 OS=Arabidopsis thaliana GN=4CLL7 PE=1 SV=1	1e-109	gi|470137418|ref|XP_004304462.1| PREDICTED: 4-coumarate--CoA ligase-like 7-like [Fragaria vesca subsp. vesca]	8e-154	B9S0G8_RICCO/35-446 B9S0G8.1 PF00501.23;AMP-binding;	5e-125	[I] Lipid transport and metabolism	-	-	GO:0005777(peroxisome);GO:0005524(ATP binding);GO:0004321(fatty-acyl-CoA synthase activity);GO:0016874(ligase activity);GO:0009695(jasmonic acid biosynthetic process)	-	-	-
comp99227_c1_seq32	2278	-	sp|Q9M0X9|4CLL7_ARATH 4-coumarate--CoA ligase-like 7 OS=Arabidopsis thaliana GN=4CLL7 PE=1 SV=1	1e-110	gi|470137418|ref|XP_004304462.1| PREDICTED: 4-coumarate--CoA ligase-like 7-like [Fragaria vesca subsp. vesca]	7e-154	B9S0G8_RICCO/35-446 B9S0G8.1 PF00501.23;AMP-binding;	4e-126	[I] Lipid transport and metabolism	-	-	GO:0005777(peroxisome);GO:0005524(ATP binding);GO:0004321(fatty-acyl-CoA synthase activity);GO:0016874(ligase activity);GO:0009695(jasmonic acid biosynthetic process)	-	-	-
comp99227_c1_seq34	2401	-	sp|Q9M0X9|4CLL7_ARATH 4-coumarate--CoA ligase-like 7 OS=Arabidopsis thaliana GN=4CLL7 PE=1 SV=1	1e-140	gi|470137418|ref|XP_004304462.1| PREDICTED: 4-coumarate--CoA ligase-like 7-like [Fragaria vesca subsp. vesca]	0	B9S0G8_RICCO/35-446 B9S0G8.1 PF00501.23;AMP-binding;	6e-155	[I] Lipid transport and metabolism	-	-	GO:0005777(peroxisome);GO:0005524(ATP binding);GO:0004321(fatty-acyl-CoA synthase activity);GO:0016874(ligase activity);GO:0009695(jasmonic acid biosynthetic process)	-	-	-
comp99227_c1_seq35	2127	-	sp|Q9M0X9|4CLL7_ARATH 4-coumarate--CoA ligase-like 7 OS=Arabidopsis thaliana GN=4CLL7 PE=1 SV=1	0	gi|470137418|ref|XP_004304462.1| PREDICTED: 4-coumarate--CoA ligase-like 7-like [Fragaria vesca subsp. vesca]	0	B9S0G8_RICCO/35-446 B9S0G8.1 PF00501.23;AMP-binding;	4e-156	[I] Lipid transport and metabolism	-	-	GO:0005777(peroxisome);GO:0005524(ATP binding);GO:0004321(fatty-acyl-CoA synthase activity);GO:0016874(ligase activity);GO:0009695(jasmonic acid biosynthetic process)	-	-	-
chalcone synthase (CHS)
comp115866_c0_seq11	1622	-	sp|P48387|CHS2_CAMSI Chalcone synthase 2 OS=Camellia sinensis GN=CHS2 PE=2 SV=1	0	gi|470141650|ref|XP_004306543.1| PREDICTED: chalcone synthase 2-like [Fragaria vesca subsp. vesca]	0	B7SJG7_MIMAU/2-228 B7SJG7.1 PF00195.14;Chal_sti_synt_N;	2e-149	-	-	-	GO:0016210(naringenin-chalcone synthase activity);GO:0009813(flavonoid biosynthetic process)	-	-	-
comp115866_c0_seq9	687	-	sp|P30078|CHSY_MALDO Chalcone synthase (Fragment) OS=Malus domestica GN=CHS PE=2 SV=1	2e-112	gi|470141648|ref|XP_004306542.1| PREDICTED: chalcone synthase 2-like [Fragaria vesca subsp. vesca]	3e-120	Q8W123_HYPPE/238-388 Q8W123.1 PF02797.10;Chal_sti_synt_C;	2e-95	-	-	-	GO:0016210(naringenin-chalcone synthase activity);GO:0009813(flavonoid biosynthetic process)	-	-	-
comp131997_c0_seq1	225	-	-	-	gi|470106987|ref|XP_004289833.1| PREDICTED: chalcone synthase-like [Fragaria vesca subsp. vesca]	1e-29	B9H143_POPTR/240-390 B9H143.1 PF02797.10;Chal_sti_synt_C;	2e-34	-	-	-	-	-	-	-
comp85682_c0_seq2	630	-	-	-	gi|470106987|ref|XP_004289833.1| PREDICTED: chalcone synthase-like [Fragaria vesca subsp. vesca]	2e-62	F6I151_VITVI/5-230 F6I151.1 PF00195.14;Chal_sti_synt_N;	3e-58	-	-	-	-	-	-	-
chalcone isomerase (CHI)
comp100721_c0_seq1	1053	-	-	-	gi|470144168|ref|XP_004307734.1| PREDICTED: chalcone--flavonone isomerase-like [Fragaria vesca subsp. vesca]	2e-111	D6N3G6_GOSHI/13-206 D6N3G6.1 PF02431.10;Chalcone;	2e-111	-	-	-	-	-	-	-
comp102747_c1_seq5	1303	-	-	-	gi|470116014|ref|XP_004294183.1| PREDICTED: chalcone--flavonone isomerase 2-like [Fragaria vesca subsp. vesca]	1e-146	B9N7T4_POPTR/88-280 B9N7T4.1 PF02431.10;Chalcone;	6e-93	-	-	-	-	-	-	-
comp102747_c2_seq1	1113	-	-	-	gi|470116014|ref|XP_004294183.1| PREDICTED: chalcone--flavonone isomerase 2-like [Fragaria vesca subsp. vesca]	8e-127	B9N7T4_POPTR/88-280 B9N7T4.1 PF02431.10;Chalcone;	1e-72	-	-	-	-	-	-	-
comp105294_c1_seq1	1480	-	sp|Q4AE12|CFI2_FRAAN Chalcone--flavonone isomerase 2 OS=Fragaria ananassa GN=CHI2 PE=2 SV=1	1e-128	gi|470143579|ref|XP_004307451.1| PREDICTED: chalcone--flavonone isomerase 1-like [Fragaria vesca subsp. vesca]	3e-128	CFI_ELAUM/18-215 O65333.1 PF02431.10;Chalcone;	2e-113	-	-	-	GO:0045430(chalcone isomerase activity);GO:0042398(cellular modified amino acid biosynthetic process);GO:0009813(flavonoid biosynthetic process)	-	-	-
flavanone 3-hydroxylase (F3H)
comp100589_c0_seq2	1550	-	sp|P51091|LDOX_MALDO Leucoanthocyanidin dioxygenase OS=Malus domestica GN=ANS PE=2 SV=1	4e-69	gi|470144031|ref|XP_004307670.1| PREDICTED: flavonol synthase/flavanone 3-hydroxylase-like isoform 1 [Fragaria vesca subsp. vesca]	0	B9HHQ5_POPTR/208-307 B9HHQ5.1 PF03171.15;2OG-FeII_Oxy;	1e-57	[Q] Secondary metabolites biosynthesis, transport and catabolism ;[R] General function prediction only	-	-	GO:0031418(L-ascorbic acid binding);GO:0050589(leucocyanidin oxygenase activity);GO:0046872(metal ion binding);GO:0016702(oxidoreductase activity, acting on single donors with incorporation of molecular oxygen, incorporation of two atoms of oxygen);GO:0009813(flavonoid biosynthetic process)	-	-	-
comp105372_c0_seq5	1555	-	sp|Q06942|FL3H_MALDO Naringenin,2-oxoglutarate 3-dioxygenase OS=Malus domestica PE=2 SV=1	1e-139	gi|51493451|gb|AAU04792.1| flavanone 3-hydroxylase [Fragaria x ananassa] gi|71979912|dbj|BAE17126.1| flavanone 3-hydroxylase [Fragaria x ananassa]	1e-154	B5KM60_9ROSA/40-151 B5KM60.1 PF14226.1;DIOX_N;	1e-72	[Q] Secondary metabolites biosynthesis, transport and catabolism ;[R] General function prediction only	-	-	GO:0031418(L-ascorbic acid binding);GO:0046872(metal ion binding);GO:0045486(naringenin 3-dioxygenase activity);GO:0016702(oxidoreductase activity, acting on single donors with incorporation of molecular oxygen, incorporation of two atoms of oxygen);GO:0009813(flavonoid biosynthetic process)	-	-	-
comp105372_c0_seq9	1710	-	sp|Q06942|FL3H_MALDO Naringenin,2-oxoglutarate 3-dioxygenase OS=Malus domestica PE=2 SV=1	0	gi|51493451|gb|AAU04792.1| flavanone 3-hydroxylase [Fragaria x ananassa] gi|71979912|dbj|BAE17126.1| flavanone 3-hydroxylase [Fragaria x ananassa]	0	B5KM60_9ROSA/40-151 B5KM60.1 PF14226.1;DIOX_N;	4e-72	[Q] Secondary metabolites biosynthesis, transport and catabolism ;[R] General function prediction only	-	-	GO:0031418(L-ascorbic acid binding);GO:0046872(metal ion binding);GO:0045486(naringenin 3-dioxygenase activity);GO:0016702(oxidoreductase activity, acting on single donors with incorporation of molecular oxygen, incorporation of two atoms of oxygen);GO:0009813(flavonoid biosynthetic process)	-	-	-
comp114401_c0_seq15	350	-	-	-	gi|470144031|ref|XP_004307670.1| PREDICTED: flavonol synthase/flavanone 3-hydroxylase-like isoform 1 [Fragaria vesca subsp. vesca]	4e-16	-	-	-	-	-	-	-	-	-
comp130708_c0_seq1	339	-	sp|Q9XHG2|FLS_MALDO Flavonol synthase/flavanone 3-hydroxylase OS=Malus domestica GN=FLS PE=2 SV=1	5e-48	gi|111183171|gb|ABH07784.1| flavonol synthase [Fragaria x ananassa]	2e-53	Q84UT8_ROSHC/42-150 Q84UT8.1 PF14226.1;DIOX_N;	7e-43	[Q] Secondary metabolites biosynthesis, transport and catabolism ;[R] General function prediction only	-	-	GO:0005737(cytoplasm);GO:0045431(flavonol synthase activity);GO:0005506(iron ion binding);GO:0031418(L-ascorbic acid binding);GO:0045486(naringenin 3-dioxygenase activity);GO:0016702(oxidoreductase activity, acting on single donors with incorporation of molecular oxygen, incorporation of two atoms of oxygen)	-	-	-
comp61399_c0_seq1	477	-	sp|Q9XHG2|FLS_MALDO Flavonol synthase/flavanone 3-hydroxylase OS=Malus domestica GN=FLS PE=2 SV=1	3e-88	gi|470109094|ref|XP_004290837.1| PREDICTED: flavonol synthase/flavanone 3-hydroxylase-like [Fragaria vesca subsp. vesca]	6e-103	Q07DT9_FRAAN/198-295 Q07DT9.1 PF03171.15;2OG-FeII_Oxy;	3e-54	[Q] Secondary metabolites biosynthesis, transport and catabolism ;[R] General function prediction only	-	-	GO:0005737(cytoplasm);GO:0045431(flavonol synthase activity);GO:0005506(iron ion binding);GO:0031418(L-ascorbic acid binding);GO:0045486(naringenin 3-dioxygenase activity);GO:0016702(oxidoreductase activity, acting on single donors with incorporation of molecular oxygen, incorporation of two atoms of oxygen)	-	-	-
comp62538_c0_seq1	227	-	sp|Q9XHG2|FLS_MALDO Flavonol synthase/flavanone 3-hydroxylase OS=Malus domestica GN=FLS PE=2 SV=1	4e-37	gi|470109094|ref|XP_004290837.1| PREDICTED: flavonol synthase/flavanone 3-hydroxylase-like [Fragaria vesca subsp. vesca]	3e-48	Q84UT8_ROSHC/42-150 Q84UT8.1 PF14226.1;DIOX_N;	2e-29	[Q] Secondary metabolites biosynthesis, transport and catabolism ;[R] General function prediction only	-	-	GO:0005737(cytoplasm);GO:0045431(flavonol synthase activity);GO:0005506(iron ion binding);GO:0031418(L-ascorbic acid binding);GO:0045486(naringenin 3-dioxygenase activity);GO:0016702(oxidoreductase activity, acting on single donors with incorporation of molecular oxygen, incorporation of two atoms of oxygen)	-	-	-
comp86219_c0_seq1	380	-	sp|Q9XHG2|FLS_MALDO Flavonol synthase/flavanone 3-hydroxylase OS=Malus domestica GN=FLS PE=2 SV=1	4e-30	gi|470109094|ref|XP_004290837.1| PREDICTED: flavonol synthase/flavanone 3-hydroxylase-like [Fragaria vesca subsp. vesca]	3e-41	Q84UT8_ROSHC/42-150 Q84UT8.1 PF14226.1;DIOX_N;	3e-22	-	-	-	GO:0005737(cytoplasm);GO:0045431(flavonol synthase activity);GO:0005506(iron ion binding);GO:0031418(L-ascorbic acid binding);GO:0045486(naringenin 3-dioxygenase activity);GO:0016702(oxidoreductase activity, acting on single donors with incorporation of molecular oxygen, incorporation of two atoms of oxygen)	-	-	-
comp93641_c0_seq3	616	-	-	-	gi|470149251|ref|XP_004310153.1| PREDICTED: flavonol synthase/flavanone 3-hydroxylase-like [Fragaria vesca subsp. vesca]	3e-110	I1J533_SOYBN/12-126 I1J533.1 PF14226.1;DIOX_N;	3e-40	[Q] Secondary metabolites biosynthesis, transport and catabolism ;[R] General function prediction only	-	-	-	-	-	-
comp93641_c0_seq4	661	-	sp|D4N501|DIOX2_PAPSO Probable 2-oxoglutarate/Fe(II)-dependent dioxygenase OS=Papaver somniferum GN=DIOX2 PE=2 SV=1	3e-43	gi|470149251|ref|XP_004310153.1| PREDICTED: flavonol synthase/flavanone 3-hydroxylase-like [Fragaria vesca subsp. vesca]	9e-120	C6F121_SOYBN/201-299 C6F121.1 PF03171.15;2OG-FeII_Oxy;	4e-51	[Q] Secondary metabolites biosynthesis, transport and catabolism ;[R] General function prediction only	-	-	GO:0005506(iron ion binding);GO:0016706(oxidoreductase activity, acting on paired donors, with incorporation or reduction of molecular oxygen, 2-oxoglutarate as one donor, and incorporation of one atom each of oxygen into both donors);GO:0016702(oxidoreductase activity, acting on single donors with incorporation of molecular oxygen, incorporation of two atoms of oxygen);GO:0016740(transferase act…	-	-	-
comp95481_c0_seq3	628	-	sp|Q0JH50|GAOX2_ORYSJ Gibberellin 20 oxidase 2 OS=Oryza sativa subsp. japonica GN=20ox2 PE=1 SV=1	3e-39	gi|470144544|ref|XP_004307914.1| PREDICTED: flavanone 3-dioxygenase-like [Fragaria vesca subsp. vesca]	3e-111	B9IDF7_POPTR/188-289 B9IDF7.1 PF03171.15;2OG-FeII_Oxy;	6e-66	[Q] Secondary metabolites biosynthesis, transport and catabolism ;[R] General function prediction only	-	-	GO:0005506(iron ion binding);GO:0016706(oxidoreductase activity, acting on paired donors, with incorporation or reduction of molecular oxygen, 2-oxoglutarate as one donor, and incorporation of one atom each of oxygen into both donors)	-	-	-
comp95481_c2_seq1	1512	-	sp|Q06942|FL3H_MALDO Naringenin,2-oxoglutarate 3-dioxygenase OS=Malus domestica PE=2 SV=1	7e-59	gi|470144544|ref|XP_004307914.1| PREDICTED: flavanone 3-dioxygenase-like [Fragaria vesca subsp. vesca]	0	B9IDF7_POPTR/188-289 B9IDF7.1 PF03171.15;2OG-FeII_Oxy;	4e-62	[Q] Secondary metabolites biosynthesis, transport and catabolism ;[R] General function prediction only	-	-	GO:0031418(L-ascorbic acid binding);GO:0046872(metal ion binding);GO:0045486(naringenin 3-dioxygenase activity);GO:0016702(oxidoreductase activity, acting on single donors with incorporation of molecular oxygen, incorporation of two atoms of oxygen);GO:0009813(flavonoid biosynthetic process)	-	-	-
comp96824_c0_seq2	432	-	-	-	gi|470144033|ref|XP_004307671.1| PREDICTED: flavonol synthase/flavanone 3-hydroxylase-like isoform 2 [Fragaria vesca subsp. vesca]	3e-60	-	-	[Q] Secondary metabolites biosynthesis, transport and catabolism ;[R] General function prediction only	-	-	-	-	-	-
comp97406_c0_seq2	1253	-	sp|Q9M547|FLS_EUSER Flavonol synthase/flavanone 3-hydroxylase OS=Eustoma exaltatum subsp. russellianum GN=FLS PE=2 SV=1	2e-58	gi|470108119|ref|XP_004290379.1| PREDICTED: gibberellin 20 oxidase 1-like [Fragaria vesca subsp. vesca]	0	I1ND30_SOYBN/187-288 I1ND30.1 PF03171.15;2OG-FeII_Oxy;	2e-59	[Q] Secondary metabolites biosynthesis, transport and catabolism ;[R] General function prediction only	-	-	GO:0005737(cytoplasm);GO:0045431(flavonol synthase activity);GO:0031418(L-ascorbic acid binding);GO:0046872(metal ion binding);GO:0045486(naringenin 3-dioxygenase activity);GO:0016702(oxidoreductase activity, acting on single donors with incorporation of molecular oxygen, incorporation of two atoms of oxygen)	-	-	-
comp98039_c0_seq4	2829	-	sp|Q9ZWQ9|FLS_CITUN Flavonol synthase/flavanone 3-hydroxylase OS=Citrus unshiu GN=FLS PE=1 SV=1	4e-44	gi|470144785|ref|XP_004308028.1| PREDICTED: 2'-deoxymugineic-acid 2'-dioxygenase-like [Fragaria vesca subsp. vesca]	0	B9GK41_POPTR/200-299 B9GK41.1 PF03171.15;2OG-FeII_Oxy;	2e-47	[Q] Secondary metabolites biosynthesis, transport and catabolism ;[R] General function prediction only	-	-	GO:0005737(cytoplasm);GO:0045431(flavonol synthase activity);GO:0031418(L-ascorbic acid binding);GO:0046872(metal ion binding);GO:0045486(naringenin 3-dioxygenase activity);GO:0016702(oxidoreductase activity, acting on single donors with incorporation of molecular oxygen, incorporation of two atoms of oxygen)	-	-	-
comp98039_c1_seq4	2238	-	sp|Q9ZWQ9|FLS_CITUN Flavonol synthase/flavanone 3-hydroxylase OS=Citrus unshiu GN=FLS PE=1 SV=1	2e-44	gi|470144785|ref|XP_004308028.1| PREDICTED: 2'-deoxymugineic-acid 2'-dioxygenase-like [Fragaria vesca subsp. vesca]	0	B9GK41_POPTR/200-299 B9GK41.1 PF03171.15;2OG-FeII_Oxy;	9e-48	[Q] Secondary metabolites biosynthesis, transport and catabolism ;[R] General function prediction only	-	-	GO:0005737(cytoplasm);GO:0045431(flavonol synthase activity);GO:0031418(L-ascorbic acid binding);GO:0046872(metal ion binding);GO:0045486(naringenin 3-dioxygenase activity);GO:0016702(oxidoreductase activity, acting on single donors with incorporation of molecular oxygen, incorporation of two atoms of oxygen)	-	-	-
comp98166_c0_seq1	977	-	sp|Q9ZWQ9|FLS_CITUN Flavonol synthase/flavanone 3-hydroxylase OS=Citrus unshiu GN=FLS PE=1 SV=1	2e-49	gi|470149251|ref|XP_004310153.1| PREDICTED: flavonol synthase/flavanone 3-hydroxylase-like [Fragaria vesca subsp. vesca]	4e-129	I1J533_SOYBN/12-126 I1J533.1 PF14226.1;DIOX_N;	2e-39	[Q] Secondary metabolites biosynthesis, transport and catabolism ;[R] General function prediction only	-	-	GO:0005737(cytoplasm);GO:0045431(flavonol synthase activity);GO:0031418(L-ascorbic acid binding);GO:0046872(metal ion binding);GO:0045486(naringenin 3-dioxygenase activity);GO:0016702(oxidoreductase activity, acting on single donors with incorporation of molecular oxygen, incorporation of two atoms of oxygen)	-	-	-
comp98166_c0_seq2	1066	-	sp|Q9ZWQ9|FLS_CITUN Flavonol synthase/flavanone 3-hydroxylase OS=Citrus unshiu GN=FLS PE=1 SV=1	2e-41	gi|470149251|ref|XP_004310153.1| PREDICTED: flavonol synthase/flavanone 3-hydroxylase-like [Fragaria vesca subsp. vesca]	1e-128	I1J533_SOYBN/12-126 I1J533.1 PF14226.1;DIOX_N;	4e-39	[Q] Secondary metabolites biosynthesis, transport and catabolism ;[R] General function prediction only	-	-	GO:0005737(cytoplasm);GO:0045431(flavonol synthase activity);GO:0031418(L-ascorbic acid binding);GO:0046872(metal ion binding);GO:0045486(naringenin 3-dioxygenase activity);GO:0016702(oxidoreductase activity, acting on single donors with incorporation of molecular oxygen, incorporation of two atoms of oxygen)	-	-	-
comp98166_c0_seq4	656	-	-	-	gi|470149251|ref|XP_004310153.1| PREDICTED: flavonol synthase/flavanone 3-hydroxylase-like [Fragaria vesca subsp. vesca]	5e-119	I1J533_SOYBN/12-126 I1J533.1 PF14226.1;DIOX_N;	9e-41	[Q] Secondary metabolites biosynthesis, transport and catabolism ;[R] General function prediction only	-	-	-	-	-	-
dihydroflavonol 4-reductase (DFR)
comp105601_c0_seq1	1023	-	sp|Q9XES5|DFRA_MALDO Bifunctional dihydroflavonol 4-reductase/flavanone 4-reductase OS=Malus domestica GN=DFR PE=1 SV=1	6e-54	gi|59939324|gb|AAX12421.1| dihydroflavonol 4-reductase [Fragaria x ananassa]	6e-64	Q5UL13_FRAAN/10-257 Q5UL13.1 PF01370.16;Epimerase;	4e-57	[V] Defense mechanisms	-	-	GO:0050662(coenzyme binding);GO:0045552(dihydrokaempferol 4-reductase activity);GO:0047890(flavanone 4-reductase activity);GO:0009813(flavonoid biosynthetic process)	-	-	-
comp105601_c0_seq11	1776	-	sp|Q9XES5|DFRA_MALDO Bifunctional dihydroflavonol 4-reductase/flavanone 4-reductase OS=Malus domestica GN=DFR PE=1 SV=1	2e-66	gi|470128349|ref|XP_004300106.1| PREDICTED: cinnamoyl-CoA reductase 2-like [Fragaria vesca subsp. vesca]	5e-137	B9R8T7_RICCO/8-251 B9R8T7.1 PF01370.16;Epimerase;	1e-83	[V] Defense mechanisms	-	-	GO:0050662(coenzyme binding);GO:0045552(dihydrokaempferol 4-reductase activity);GO:0047890(flavanone 4-reductase activity);GO:0009813(flavonoid biosynthetic process)	-	-	-
comp105601_c0_seq2	1711	-	sp|Q9XES5|DFRA_MALDO Bifunctional dihydroflavonol 4-reductase/flavanone 4-reductase OS=Malus domestica GN=DFR PE=1 SV=1	9e-60	gi|470128349|ref|XP_004300106.1| PREDICTED: cinnamoyl-CoA reductase 2-like [Fragaria vesca subsp. vesca]	8e-106	D7UDF5_VITVI/7-251 D7UDF5.1 PF01370.16;Epimerase;	7e-86	[V] Defense mechanisms	-	-	GO:0050662(coenzyme binding);GO:0045552(dihydrokaempferol 4-reductase activity);GO:0047890(flavanone 4-reductase activity);GO:0009813(flavonoid biosynthetic process)	-	-	-
comp105601_c0_seq3	1813	-	sp|Q9XES5|DFRA_MALDO Bifunctional dihydroflavonol 4-reductase/flavanone 4-reductase OS=Malus domestica GN=DFR PE=1 SV=1	2e-60	gi|470128349|ref|XP_004300106.1| PREDICTED: cinnamoyl-CoA reductase 2-like [Fragaria vesca subsp. vesca]	8e-106	D7UDF5_VITVI/7-251 D7UDF5.1 PF01370.16;Epimerase;	2e-85	[V] Defense mechanisms	-	-	GO:0050662(coenzyme binding);GO:0045552(dihydrokaempferol 4-reductase activity);GO:0047890(flavanone 4-reductase activity);GO:0009813(flavonoid biosynthetic process)	-	-	-
comp105601_c0_seq5	1878	-	sp|Q9XES5|DFRA_MALDO Bifunctional dihydroflavonol 4-reductase/flavanone 4-reductase OS=Malus domestica GN=DFR PE=1 SV=1	6e-67	gi|470128349|ref|XP_004300106.1| PREDICTED: cinnamoyl-CoA reductase 2-like [Fragaria vesca subsp. vesca]	1e-138	B9R8T7_RICCO/8-251 B9R8T7.1 PF01370.16;Epimerase;	1e-83	[V] Defense mechanisms	-	-	GO:0050662(coenzyme binding);GO:0045552(dihydrokaempferol 4-reductase activity);GO:0047890(flavanone 4-reductase activity);GO:0009813(flavonoid biosynthetic process)	-	-	-
comp105601_c0_seq7	733	-	sp|Q9XES5|DFRA_MALDO Bifunctional dihydroflavonol 4-reductase/flavanone 4-reductase OS=Malus domestica GN=DFR PE=1 SV=1	1e-55	gi|59939324|gb|AAX12421.1| dihydroflavonol 4-reductase [Fragaria x ananassa]	2e-59	C3UZH2_9ROSA/8-254 C3UZH2.1 PF01370.16;Epimerase;	9e-66	[V] Defense mechanisms	-	-	GO:0050662(coenzyme binding);GO:0045552(dihydrokaempferol 4-reductase activity);GO:0047890(flavanone 4-reductase activity);GO:0009813(flavonoid biosynthetic process)	-	-	-
comp105601_c0_seq8	824	-	sp|Q9XES5|DFRA_MALDO Bifunctional dihydroflavonol 4-reductase/flavanone 4-reductase OS=Malus domestica GN=DFR PE=1 SV=1	2e-50	gi|59939324|gb|AAX12421.1| dihydroflavonol 4-reductase [Fragaria x ananassa]	3e-54	F2VR49_PRUAV/8-264 F2VR49.1 PF01370.16;Epimerase;	5e-48	[V] Defense mechanisms	-	-	GO:0050662(coenzyme binding);GO:0045552(dihydrokaempferol 4-reductase activity);GO:0047890(flavanone 4-reductase activity);GO:0009813(flavonoid biosynthetic process)	-	-	-
comp111894_c0_seq11	2576	-	sp|Q9XES5|DFRA_MALDO Bifunctional dihydroflavonol 4-reductase/flavanone 4-reductase OS=Malus domestica GN=DFR PE=1 SV=1	0	gi|470111242|ref|XP_004291858.1| PREDICTED: bifunctional dihydroflavonol 4-reductase/flavanone 4-reductase-like [Fragaria vesca subsp. vesca]	1e-176	B9X2I6_ROSHC/8-254 B9X2I6.1 PF01370.16;Epimerase;	4e-141	[V] Defense mechanisms	-	-	GO:0050662(coenzyme binding);GO:0045552(dihydrokaempferol 4-reductase activity);GO:0047890(flavanone 4-reductase activity);GO:0009813(flavonoid biosynthetic process)	-	-	-
comp112886_c1_seq2	1992	-	sp|Q9XES5|DFRA_MALDO Bifunctional dihydroflavonol 4-reductase/flavanone 4-reductase OS=Malus domestica GN=DFR PE=1 SV=1	0	gi|51872671|gb|AAU12363.1| dihydroflavonol 4-reductase [Fragaria x ananassa] gi|401715667|gb|AFP99286.1| dihydroflavonol 4-reductase [Fragaria x ananassa]	0	Q5UL13_FRAAN/10-257 Q5UL13.1 PF01370.16;Epimerase;	6e-172	[V] Defense mechanisms	-	-	GO:0050662(coenzyme binding);GO:0045552(dihydrokaempferol 4-reductase activity);GO:0047890(flavanone 4-reductase activity);GO:0009813(flavonoid biosynthetic process)	-	-	-
comp112886_c1_seq3	836	-	sp|Q9XES5|DFRA_MALDO Bifunctional dihydroflavonol 4-reductase/flavanone 4-reductase OS=Malus domestica GN=DFR PE=1 SV=1	2e-62	gi|51872671|gb|AAU12363.1| dihydroflavonol 4-reductase [Fragaria x ananassa] gi|401715667|gb|AFP99286.1| dihydroflavonol 4-reductase [Fragaria x ananassa]	1e-69	G9I5H8_ARAHY/8-293 G9I5H8.1 PF01370.16;Epimerase;	1e-29	[V] Defense mechanisms	-	-	GO:0050662(coenzyme binding);GO:0045552(dihydrokaempferol 4-reductase activity);GO:0047890(flavanone 4-reductase activity);GO:0009813(flavonoid biosynthetic process)	-	-	-
comp112886_c4_seq1	1064	-	sp|Q9XES5|DFRA_MALDO Bifunctional dihydroflavonol 4-reductase/flavanone 4-reductase OS=Malus domestica GN=DFR PE=1 SV=1	2e-84	gi|51872671|gb|AAU12363.1| dihydroflavonol 4-reductase [Fragaria x ananassa] gi|401715667|gb|AFP99286.1| dihydroflavonol 4-reductase [Fragaria x ananassa]	1e-89	G9I5H8_ARAHY/8-293 G9I5H8.1 PF01370.16;Epimerase;	3e-50	[V] Defense mechanisms	-	-	GO:0050662(coenzyme binding);GO:0045552(dihydrokaempferol 4-reductase activity);GO:0047890(flavanone 4-reductase activity);GO:0009813(flavonoid biosynthetic process)	-	-	-
comp95572_c0_seq2	1546	-	sp|Q9XES5|DFRA_MALDO Bifunctional dihydroflavonol 4-reductase/flavanone 4-reductase OS=Malus domestica GN=DFR PE=1 SV=1	2e-81	gi|470142462|ref|XP_004306926.1| PREDICTED: dihydroflavonol-4-reductase-like [Fragaria vesca subsp. vesca]	0	F6I367_VITVI/10-257 F6I367.1 PF01370.16;Epimerase;	4e-99	[V] Defense mechanisms	-	-	GO:0050662(coenzyme binding);GO:0045552(dihydrokaempferol 4-reductase activity);GO:0047890(flavanone 4-reductase activity);GO:0009813(flavonoid biosynthetic process)	-	-	-
comp95572_c0_seq4	1569	-	sp|Q84KP0|DFRA_PYRCO Bifunctional dihydroflavonol 4-reductase/flavanone 4-reductase OS=Pyrus communis GN=DFR PE=1 SV=1	4e-51	gi|470142462|ref|XP_004306926.1| PREDICTED: dihydroflavonol-4-reductase-like [Fragaria vesca subsp. vesca]	3e-130	F6I367_VITVI/10-257 F6I367.1 PF01370.16;Epimerase;	1e-74	-	-	-	GO:0050662(coenzyme binding);GO:0045552(dihydrokaempferol 4-reductase activity);GO:0047890(flavanone 4-reductase activity);GO:0009813(flavonoid biosynthetic process)	-	-	-
anthocyanidin synthase (ANS)
comp101059_c0_seq11	1794	-	sp|P51091|LDOX_MALDO Leucoanthocyanidin dioxygenase OS=Malus domestica GN=ANS PE=2 SV=1	0	gi|401715669|gb|AFP99287.1| anthocyanidin synthase [Fragaria x ananassa]	0	Q5UL08_FRAAN/51-165 Q5UL08.1 PF14226.1;DIOX_N;	9e-75	[Q] Secondary metabolites biosynthesis, transport and catabolism ;[R] General function prediction only	-	-	GO:0031418(L-ascorbic acid binding);GO:0050589(leucocyanidin oxygenase activity);GO:0046872(metal ion binding);GO:0016702(oxidoreductase activity, acting on single donors with incorporation of molecular oxygen, incorporation of two atoms of oxygen);GO:0009813(flavonoid biosynthetic process)	-	-	-
comp100589_c0_seq2	1550	-	sp|P51091|LDOX_MALDO Leucoanthocyanidin dioxygenase OS=Malus domestica GN=ANS PE=2 SV=1	4e-69	gi|470144031|ref|XP_004307670.1| PREDICTED: flavonol synthase/flavanone 3-hydroxylase-like isoform 1 [Fragaria vesca subsp. vesca]	0	B9HHQ5_POPTR/208-307 B9HHQ5.1 PF03171.15;2OG-FeII_Oxy;	1e-57	[Q] Secondary metabolites biosynthesis, transport and catabolism ;[R] General function prediction only	-	-	GO:0031418(L-ascorbic acid binding);GO:0050589(leucocyanidin oxygenase activity);GO:0046872(metal ion binding);GO:0016702(oxidoreductase activity, acting on single donors with incorporation of molecular oxygen, incorporation of two atoms of oxygen);GO:0009813(flavonoid biosynthetic process)	-	-	-
Leucoanthocyanidin reductase (LAR)
comp101416_c0_seq1	1544	-	sp|Q84V83|LAR_DESUN Leucoanthocyanidin reductase OS=Desmodium uncinatum GN=LAR PE=1 SV=1	6e-164	gi|401715671|gb|AFP99288.1| leucoanthocyanidin reductase [Fragaria x ananassa]	0	Q0PHA9_FRAAN/16-308 Q0PHA9.2 PF05368.8;NmrA;	0	-	-	-	GO:0005488(binding);GO:0033788(leucoanthocyanidin reductase activity)	-	-	-
anthocyanidin reductase (ANR)
comp101618_c0_seq3	1438	-	-	-	gi|470129936|ref|XP_004300863.1| PREDICTED: anthocyanidin reductase-like [Fragaria vesca subsp. vesca]	0	B9GL76_POPTR/8-270 B9GL76.1 PF01370.16;Epimerase;	2e-130	[V] Defense mechanisms	-	-	-	-	-	-
comp103703_c0_seq1	1323	-	sp|Q9SEV0|BAN_ARATH Anthocyanidin reductase OS=Arabidopsis thaliana GN=BAN PE=1 SV=2	1e-112	gi|110564477|gb|ABG76842.1| anthocyanidin reductase [Fragaria x ananassa]	0	Q06YK2_FRAAN/13-267 Q06YK2.1 PF01370.16;Epimerase;	1e-166	[V] Defense mechanisms	-	-	GO:0033729(anthocyanidin reductase activity);GO:0050662(coenzyme binding);GO:0009813(flavonoid biosynthetic process);GO:0009964(negative regulation of flavonoid biosynthetic process)	-	-	-
glucosyltransferase (GT)
comp105478_c1_seq2	1887	-	sp|Q2V6J9|UFOG7_FRAAN UDP-glucose flavonoid 3-O-glucosyltransferase 7 OS=Fragaria ananassa GN=GT7 PE=1 SV=1	1e-172	gi|470136490|ref|XP_004304024.1| PREDICTED: UDP-glucose flavonoid 3-O-glucosyltransferase 7-like [Fragaria vesca subsp. vesca]	0	UFOG7_FRAAN/17-404 Q2V6J9.1 PF00201.13;UDPGT;	3e-179	[G] Carbohydrate transport and metabolism ;[C] Energy production and conversion	-	-	-	-	-	-
comp105478_c1_seq3	1093	-	sp|Q2V6J9|UFOG7_FRAAN UDP-glucose flavonoid 3-O-glucosyltransferase 7 OS=Fragaria ananassa GN=GT7 PE=1 SV=1	6e-111	gi|470136488|ref|XP_004304023.1| PREDICTED: UDP-glucose flavonoid 3-O-glucosyltransferase 7-like [Fragaria vesca subsp. vesca]	7e-133	B9RYD9_RICCO/176-446 B9RYD9.1 PF00201.13;UDPGT;	4e-113	[G] Carbohydrate transport and metabolism ;[C] Energy production and conversion	-	-	-	-	-	-
comp105478_c1_seq5	1900	-	sp|Q2V6J9|UFOG7_FRAAN UDP-glucose flavonoid 3-O-glucosyltransferase 7 OS=Fragaria ananassa GN=GT7 PE=1 SV=1	2e-171	gi|470136488|ref|XP_004304023.1| PREDICTED: UDP-glucose flavonoid 3-O-glucosyltransferase 7-like [Fragaria vesca subsp. vesca]	0	UFOG7_FRAAN/17-404 Q2V6J9.1 PF00201.13;UDPGT;	1e-172	[G] Carbohydrate transport and metabolism ;[C] Energy production and conversion	-	-	-	-	-	-
comp105708_c0_seq13	1904	-	sp|Q2V6J9|UFOG7_FRAAN UDP-glucose flavonoid 3-O-glucosyltransferase 7 OS=Fragaria ananassa GN=GT7 PE=1 SV=1	4e-169	gi|470136488|ref|XP_004304023.1| PREDICTED: UDP-glucose flavonoid 3-O-glucosyltransferase 7-like [Fragaria vesca subsp. vesca]	0	UFOG7_FRAAN/17-404 Q2V6J9.1 PF00201.13;UDPGT;	6e-172	[G] Carbohydrate transport and metabolism ;[C] Energy production and conversion	-	-	-	-	-	-
comp105708_c0_seq16	1857	-	sp|Q2V6J9|UFOG7_FRAAN UDP-glucose flavonoid 3-O-glucosyltransferase 7 OS=Fragaria ananassa GN=GT7 PE=1 SV=1	4e-170	gi|470136488|ref|XP_004304023.1| PREDICTED: UDP-glucose flavonoid 3-O-glucosyltransferase 7-like [Fragaria vesca subsp. vesca]	0	UFOG7_FRAAN/17-404 Q2V6J9.1 PF00201.13;UDPGT;	6e-171	[G] Carbohydrate transport and metabolism ;[C] Energy production and conversion	-	-	-	-	-	-
comp108011_c0_seq2	2056	-	sp|Q2V6K1|UGT_FRAAN Putative UDP-glucose glucosyltransferase OS=Fragaria ananassa GN=GT5 PE=2 SV=1	0	gi|122209733|sp|Q2V6K1.1|UGT_FRAAN RecName: Full=Putative UDP-glucose glucosyltransferase; Short=FaGT5; AltName: Full=Glucosyltransferase 5 gi|82880416|gb|ABB92747.1| UDP-glucose glucosyltransferase [Fragaria x ananassa]	0	I1NFW9_SOYBN/103-444 I1NFW9.1 PF00201.13;UDPGT;	3e-158	[G] Carbohydrate transport and metabolism ;[C] Energy production and conversion	-	-	-	-	-	-
comp108214_c0_seq4	2369	-	sp|Q2V6J9|UFOG7_FRAAN UDP-glucose flavonoid 3-O-glucosyltransferase 7 OS=Fragaria ananassa GN=GT7 PE=1 SV=1	4e-155	gi|470137933|ref|XP_004304714.1| PREDICTED: UDP-glucose flavonoid 3-O-glucosyltransferase 7-like [Fragaria vesca subsp. vesca]	0	B9NG81_POPTR/80-447 B9NG81.1 PF00201.13;UDPGT;	3e-144	[G] Carbohydrate transport and metabolism ;[C] Energy production and conversion	-	-	-	-	-	-
comp108887_c3_seq3	2276	-	sp|Q66PF3|UFOG3_FRAAN Putative UDP-glucose flavonoid 3-O-glucosyltransferase 3 OS=Fragaria ananassa GN=GT3 PE=2 SV=1	6e-123	gi|470137523|ref|XP_004304513.1| PREDICTED: putative UDP-glucose flavonoid 3-O-glucosyltransferase 3-like [Fragaria vesca subsp. vesca]	0	UFOG3_FRAAN/47-451 Q66PF3.1 PF00201.13;UDPGT;	3e-129	[G] Carbohydrate transport and metabolism ;[C] Energy production and conversion	-	-	-	-	-	-
comp111895_c0_seq1	757	-	sp|Q66PF3|UFOG3_FRAAN Putative UDP-glucose flavonoid 3-O-glucosyltransferase 3 OS=Fragaria ananassa GN=GT3 PE=2 SV=1	2e-117	gi|470136345|ref|XP_004303955.1| PREDICTED: UDP-glucose flavonoid 3-O-glucosyltransferase 6-like [Fragaria vesca subsp. vesca]	1e-118	D3UAG1_PYRCO/247-445 D3UAG1.1 PF00201.13;UDPGT;	1e-102	[G] Carbohydrate transport and metabolism ;[C] Energy production and conversion	-	-	-	-	-	-
comp111895_c0_seq3	922	-	sp|Q66PF3|UFOG3_FRAAN Putative UDP-glucose flavonoid 3-O-glucosyltransferase 3 OS=Fragaria ananassa GN=GT3 PE=2 SV=1	2e-113	gi|470136343|ref|XP_004303954.1| PREDICTED: putative UDP-glucose flavonoid 3-O-glucosyltransferase 3-like [Fragaria vesca subsp. vesca]	2e-115	UFOG6_FRAAN/225-457 Q2V6K0.1 PF00201.13;UDPGT;	1e-100	[G] Carbohydrate transport and metabolism ;[C] Energy production and conversion	-	-	-	-	-	-
comp111895_c0_seq5	748	-	sp|Q2V6K0|UFOG6_FRAAN UDP-glucose flavonoid 3-O-glucosyltransferase 6 OS=Fragaria ananassa GN=GT6 PE=1 SV=1	9e-94	gi|470136345|ref|XP_004303955.1| PREDICTED: UDP-glucose flavonoid 3-O-glucosyltransferase 6-like [Fragaria vesca subsp. vesca]	5e-117	UFOG3_FRAAN/47-451 Q66PF3.1 PF00201.13;UDPGT;	6e-60	[G] Carbohydrate transport and metabolism ;[C] Energy production and conversion	-	-	-	-	-	-
comp113078_c0_seq7	1848	-	sp|Q66PF3|UFOG3_FRAAN Putative UDP-glucose flavonoid 3-O-glucosyltransferase 3 OS=Fragaria ananassa GN=GT3 PE=2 SV=1	0	gi|470136343|ref|XP_004303954.1| PREDICTED: putative UDP-glucose flavonoid 3-O-glucosyltransferase 3-like [Fragaria vesca subsp. vesca]	0	UFOG3_FRAAN/47-451 Q66PF3.1 PF00201.13;UDPGT;	0	[G] Carbohydrate transport and metabolism ;[C] Energy production and conversion	-	-	-	-	-	-
comp133738_c0_seq1	226	-	-	-	gi|470137525|ref|XP_004304514.1| PREDICTED: putative UDP-glucose flavonoid 3-O-glucosyltransferase 3-like [Fragaria vesca subsp. vesca]	5e-16	-	-	-	-	-	-	-	-	-
comp134618_c0_seq1	292	-	-	-	gi|470132205|ref|XP_004301976.1| PREDICTED: UDP-glucose flavonoid 3-O-glucosyltransferase 6-like [Fragaria vesca subsp. vesca]	9e-37	-	-	-	-	-	-	-	-	-
comp137087_c0_seq1	260	-	sp|Q2V6J9|UFOG7_FRAAN UDP-glucose flavonoid 3-O-glucosyltransferase 7 OS=Fragaria ananassa GN=GT7 PE=1 SV=1	2e-34	gi|470111745|ref|XP_004292105.1| PREDICTED: uncharacterized protein LOC101305722 [Fragaria vesca subsp. vesca]	2e-42	A5BR78_VITVI/100-445 A5BR78.1 PF00201.13;UDPGT;	3e-29	[G] Carbohydrate transport and metabolism ;[C] Energy production and conversion	-	-	-	-	-	-
comp20799_c0_seq1	240	-	-	-	gi|470137525|ref|XP_004304514.1| PREDICTED: putative UDP-glucose flavonoid 3-O-glucosyltransferase 3-like [Fragaria vesca subsp. vesca]	1e-37	-	-	-	-	-	-	-	-	-
comp31250_c0_seq1	328	-	-	-	gi|470137525|ref|XP_004304514.1| PREDICTED: putative UDP-glucose flavonoid 3-O-glucosyltransferase 3-like [Fragaria vesca subsp. vesca]	4e-57	-	-	-	-	-	-	-	-	-
comp57117_c0_seq1	292	-	sp|Q2V6J9|UFOG7_FRAAN UDP-glucose flavonoid 3-O-glucosyltransferase 7 OS=Fragaria ananassa GN=GT7 PE=1 SV=1	5e-44	gi|470111745|ref|XP_004292105.1| PREDICTED: uncharacterized protein LOC101305722 [Fragaria vesca subsp. vesca]	1e-58	I1JE18_SOYBN/202-443 I1JE18.1 PF00201.13;UDPGT;	5e-35	[G] Carbohydrate transport and metabolism ;[C] Energy production and conversion	-	-	-	-	-	-
comp65697_c1_seq1	262	-	sp|Q2V6J9|UFOG7_FRAAN UDP-glucose flavonoid 3-O-glucosyltransferase 7 OS=Fragaria ananassa GN=GT7 PE=1 SV=1	2e-34	gi|470136488|ref|XP_004304023.1| PREDICTED: UDP-glucose flavonoid 3-O-glucosyltransferase 7-like [Fragaria vesca subsp. vesca]	6e-39	B9GHB6_POPTR/97-453 B9GHB6.1 PF00201.13;UDPGT;	6e-30	-	-	-	-	-	-	-
comp97366_c0_seq4	1760	-	sp|Q66PF3|UFOG3_FRAAN Putative UDP-glucose flavonoid 3-O-glucosyltransferase 3 OS=Fragaria ananassa GN=GT3 PE=2 SV=1	0	gi|470147397|ref|XP_004309300.1| PREDICTED: putative UDP-glucose flavonoid 3-O-glucosyltransferase 3-like [Fragaria vesca subsp. vesca]	0	UFOG3_FRAAN/47-451 Q66PF3.1 PF00201.13;UDPGT;	0	[G] Carbohydrate transport and metabolism ;[C] Energy production and conversion	-	-	-	-	-	-
comp97366_c0_seq6	1633	-	sp|Q66PF3|UFOG3_FRAAN Putative UDP-glucose flavonoid 3-O-glucosyltransferase 3 OS=Fragaria ananassa GN=GT3 PE=2 SV=1	0	gi|75288885|sp|Q66PF3.1|UFOG3_FRAAN RecName: Full=Putative UDP-glucose flavonoid 3-O-glucosyltransferase 3; Short=FaGT3; AltName: Full=Flavonol 3-O-glucosyltransferase 3 gi|51705413|gb|AAU09444.1| UDP-glucose glucosyltransferase [Fragaria x ananassa]	0	UFOG3_FRAAN/47-451 Q66PF3.1 PF00201.13;UDPGT;	0	[G] Carbohydrate transport and metabolism ;[C] Energy production and conversion	-	-	-	-	-	-
comp97366_c0_seq7	1337	-	sp|Q66PF3|UFOG3_FRAAN Putative UDP-glucose flavonoid 3-O-glucosyltransferase 3 OS=Fragaria ananassa GN=GT3 PE=2 SV=1	0	gi|75288885|sp|Q66PF3.1|UFOG3_FRAAN RecName: Full=Putative UDP-glucose flavonoid 3-O-glucosyltransferase 3; Short=FaGT3; AltName: Full=Flavonol 3-O-glucosyltransferase 3 gi|51705413|gb|AAU09444.1| UDP-glucose glucosyltransferase [Fragaria x ananassa]	0	UFOG3_FRAAN/47-451 Q66PF3.1 PF00201.13;UDPGT;	0	[G] Carbohydrate transport and metabolism ;[C] Energy production and conversion	-	-	-	-	-	-
comp98299_c0_seq26	1884	-	sp|Q2V6J9|UFOG7_FRAAN UDP-glucose flavonoid 3-O-glucosyltransferase 7 OS=Fragaria ananassa GN=GT7 PE=1 SV=1	2e-86	gi|462394433|gb|EMJ00232.1| hypothetical protein PRUPE_ppa018059mg [Prunus persica]	7e-87	UFOG7_FRAAN/17-404 Q2V6J9.1 PF00201.13;UDPGT;	3e-79	[G] Carbohydrate transport and metabolism ;[C] Energy production and conversion	-	-	-	-	-	-
comp98711_c0_seq1	476	-	sp|Q2V6J9|UFOG7_FRAAN UDP-glucose flavonoid 3-O-glucosyltransferase 7 OS=Fragaria ananassa GN=GT7 PE=1 SV=1	8e-34	gi|462396419|gb|EMJ02218.1| hypothetical protein PRUPE_ppa005572mg [Prunus persica]	3e-35	G7LH03_MEDTR/265-454 G7LH03.1 PF00201.13;UDPGT;	3e-24	[G] Carbohydrate transport and metabolism ;[C] Energy production and conversion	-	-	-	-	-	-
comp98711_c1_seq1	484	-	sp|Q2V6J9|UFOG7_FRAAN UDP-glucose flavonoid 3-O-glucosyltransferase 7 OS=Fragaria ananassa GN=GT7 PE=1 SV=1	2e-34	gi|462396419|gb|EMJ02218.1| hypothetical protein PRUPE_ppa005572mg [Prunus persica]	1e-35	B9RYE0_RICCO/257-456 B9RYE0.1 PF00201.13;UDPGT;	3e-24	[G] Carbohydrate transport and metabolism ;[C] Energy production and conversion	-	-	-	-	-	-
comp98711_c1_seq3	530	-	sp|Q2V6J9|UFOG7_FRAAN UDP-glucose flavonoid 3-O-glucosyltransferase 7 OS=Fragaria ananassa GN=GT7 PE=1 SV=1	4e-34	gi|462396419|gb|EMJ02218.1| hypothetical protein PRUPE_ppa005572mg [Prunus persica]	2e-35	B9RYE0_RICCO/257-456 B9RYE0.1 PF00201.13;UDPGT;	5e-24	[G] Carbohydrate transport and metabolism ;[C] Energy production and conversion	-	-	-	-	-	-
comp98718_c0_seq1	1244	-	sp|Q2V6J9|UFOG7_FRAAN UDP-glucose flavonoid 3-O-glucosyltransferase 7 OS=Fragaria ananassa GN=GT7 PE=1 SV=1	3e-126	gi|470140426|ref|XP_004305941.1| PREDICTED: UDP-glucose flavonoid 3-O-glucosyltransferase 7-like [Fragaria vesca subsp. vesca]	0	UFOG7_FRAAN/17-404 Q2V6J9.1 PF00201.13;UDPGT;	2e-127	[G] Carbohydrate transport and metabolism ;[C] Energy production and conversion	-	-	-	-	-	-
comp99738_c0_seq1	1522	-	sp|Q2V6K0|UFOG6_FRAAN UDP-glucose flavonoid 3-O-glucosyltransferase 6 OS=Fragaria ananassa GN=GT6 PE=1 SV=1	0	gi|470136349|ref|XP_004303956.1| PREDICTED: UDP-glucose flavonoid 3-O-glucosyltransferase 6-like [Fragaria vesca subsp. vesca]	0	UFOG3_FRAAN/47-451 Q66PF3.1 PF00201.13;UDPGT;	0	[G] Carbohydrate transport and metabolism ;[C] Energy production and conversion	-	-	-	-	-	-
comp99738_c0_seq3	1507	-	sp|Q2V6K0|UFOG6_FRAAN UDP-glucose flavonoid 3-O-glucosyltransferase 6 OS=Fragaria ananassa GN=GT6 PE=1 SV=1	4e-151	gi|470136349|ref|XP_004303956.1| PREDICTED: UDP-glucose flavonoid 3-O-glucosyltransferase 6-like [Fragaria vesca subsp. vesca]	7e-123	UFOG6_FRAAN/225-457 Q2V6K0.1 PF00201.13;UDPGT;	2e-138	[G] Carbohydrate transport and metabolism ;[C] Energy production and conversion	-	-	-	-	-	-
comp103067_c0_seq12	2680	-	sp|Q40287|UFOG5_MANES Anthocyanidin 3-O-glucosyltransferase 5 OS=Manihot esculenta GN=GT5 PE=1 SV=1	2e-131	gi|470132024|ref|XP_004301887.1| PREDICTED: anthocyanidin 3-O-glucosyltransferase 5-like [Fragaria vesca subsp. vesca]	0	F6GWZ0_VITVI/187-439 F6GWZ0.1 PF00201.13;UDPGT;	8e-84	[G] Carbohydrate transport and metabolism ;[C] Energy production and conversion	-	-	GO:0047213(anthocyanidin 3-O-glucosyltransferase activity)	-	-	-
comp103067_c0_seq7	618	-	sp|Q40287|UFOG5_MANES Anthocyanidin 3-O-glucosyltransferase 5 OS=Manihot esculenta GN=GT5 PE=1 SV=1	1e-16	gi|470132022|ref|XP_004301886.1| PREDICTED: anthocyanidin 3-O-glucosyltransferase 5-like [Fragaria vesca subsp. vesca]	3e-54	-	-	-	-	-	GO:0047213(anthocyanidin 3-O-glucosyltransferase activity)	-	-	-
comp103226_c0_seq1	2066	-	sp|Q4R1I9|ANGLT_ROSHC Anthocyanidin 5,3-O-glucosyltransferase OS=Rosa hybrid cultivar GN=RhGT1 PE=2 SV=1	4e-110	gi|470127735|ref|XP_004299818.1| PREDICTED: anthocyanidin 5,3-O-glucosyltransferase-like [Fragaria vesca subsp. vesca]	0	A5BFH4_VITVI/3-443 A5BFH4.1 PF00201.13;UDPGT;	1e-158	[G] Carbohydrate transport and metabolism ;[C] Energy production and conversion	-	-	GO:0016758(transferase activity, transferring hexosyl groups)	-	-	-
comp103854_c0_seq2	1110	-	sp|Q43716|UFOG_PETHY Anthocyanidin 3-O-glucosyltransferase OS=Petunia hybrida GN=RT PE=2 SV=1	8e-55	gi|470131550|ref|XP_004301656.1| PREDICTED: UDP-glycosyltransferase 79B3-like [Fragaria vesca subsp. vesca]	2e-170	I1LS93_SOYBN/175-425 I1LS93.1 PF00201.13;UDPGT;	6e-60	-	-	-	GO:0047213(anthocyanidin 3-O-glucosyltransferase activity)	-	-	-
comp103854_c1_seq1	522	-	sp|Q43716|UFOG_PETHY Anthocyanidin 3-O-glucosyltransferase OS=Petunia hybrida GN=RT PE=2 SV=1	2e-39	gi|357446799|ref|XP_003593675.1| Anthocyanidin 3-O-glucosyltransferase [Medicago truncatula] gi|355482723|gb|AES63926.1| Anthocyanidin 3-O-glucosyltransferase [Medicago truncatula]	1e-53	I1LUP9_SOYBN/25-210 I1LUP9.1 PF00201.13;UDPGT;	1e-47	-	-	-	GO:0047213(anthocyanidin 3-O-glucosyltransferase activity)	-	-	-
comp138752_c0_seq1	260	-	sp|Q40285|UFOG2_MANES Anthocyanidin 3-O-glucosyltransferase 2 (Fragment) OS=Manihot esculenta GN=GT2 PE=2 SV=1	2e-49	gi|470137521|ref|XP_004304512.1| PREDICTED: putative UDP-glucose flavonoid 3-O-glucosyltransferase 3-like [Fragaria vesca subsp. vesca]	2e-48	UFOG2_MANES/85-318 Q40285.1 PF00201.13;UDPGT;	2e-50	[G] Carbohydrate transport and metabolism ;[C] Energy production and conversion	-	-	GO:0047213(anthocyanidin 3-O-glucosyltransferase activity)	-	-	-
comp43342_c0_seq1	207	-	sp|Q40287|UFOG5_MANES Anthocyanidin 3-O-glucosyltransferase 5 OS=Manihot esculenta GN=GT5 PE=1 SV=1	2e-22	gi|470114029|ref|XP_004293221.1| PREDICTED: anthocyanidin 3-O-glucosyltransferase 5-like [Fragaria vesca subsp. vesca]	2e-34	E0CQ07_VITVI/230-448 E0CQ07.1 PF00201.13;UDPGT;	1e-22	[G] Carbohydrate transport and metabolism ;[C] Energy production and conversion	-	-	GO:0047213(anthocyanidin 3-O-glucosyltransferase activity)	-	-	-
comp67825_c0_seq1	385	-	sp|Q40286|UFOG4_MANES Anthocyanidin 3-O-glucosyltransferase 4 (Fragment) OS=Manihot esculenta GN=GT4 PE=2 SV=1	4e-45	gi|470137140|ref|XP_004304331.1| PREDICTED: UDP-glycosyltransferase 73D1-like [Fragaria vesca subsp. vesca]	8e-71	B9S0A3_RICCO/204-440 B9S0A3.1 PF00201.13;UDPGT;	7e-41	[G] Carbohydrate transport and metabolism ;[C] Energy production and conversion	-	-	GO:0047213(anthocyanidin 3-O-glucosyltransferase activity)	-	-	-
comp105708_c0_seq12	1837	-	sp|Q8H0F2|ANGT_GENTR Anthocyanin 3'-O-beta-glucosyltransferase OS=Gentiana triflora PE=1 SV=1	2e-136	gi|470136492|ref|XP_004304025.1| PREDICTED: UDP-glucose flavonoid 3-O-glucosyltransferase 7-like [Fragaria vesca subsp. vesca]	0	B9RYD5_RICCO/10-445 B9RYD5.1 PF00201.13;UDPGT;	3e-132	[G] Carbohydrate transport and metabolism ;[C] Energy production and conversion	-	-	GO:0033837(anthocyanin 3'-O-beta-glucosyltransferase activity)	-	-	-
comp105708_c0_seq4	1884	-	sp|Q8H0F2|ANGT_GENTR Anthocyanin 3'-O-beta-glucosyltransferase OS=Gentiana triflora PE=1 SV=1	1e-131	gi|470136490|ref|XP_004304024.1| PREDICTED: UDP-glucose flavonoid 3-O-glucosyltransferase 7-like [Fragaria vesca subsp. vesca]	0	B9RYD5_RICCO/10-445 B9RYD5.1 PF00201.13;UDPGT;	2e-126	[G] Carbohydrate transport and metabolism ;[C] Energy production and conversion	-	-	GO:0033837(anthocyanin 3'-O-beta-glucosyltransferase activity)	-	-	-
transcription factor (TF)
comp106434_c0_seq1	1245	-	sp|O24646|HY5_ARATH Transcription factor HY5 OS=Arabidopsis thaliana GN=HY5 PE=1 SV=1	4e-55	gi|470110394|ref|XP_004291469.1| PREDICTED: transcription factor HY5-like [Fragaria vesca subsp. vesca]	8e-89	D6MKH0_9ASPA/84-150 D6MKH0.1 PF00170.16;bZIP_1;	9e-35	[K] Transcription	-	-	GO:0005634(nucleus);GO:0003690(double-stranded DNA binding);GO:0046983(protein dimerization activity);GO:0043565(sequence-specific DNA binding);GO:0003700(sequence-specific DNA binding transcription factor activity);GO:0009740(gibberellic acid mediated signaling pathway);GO:0031539(positive regulation of anthocyanin metabolic process);GO:0042753(positive regulation of circadian rhythm);GO:0009585…	-	-	-
comp106434_c0_seq6	1218	-	sp|O24646|HY5_ARATH Transcription factor HY5 OS=Arabidopsis thaliana GN=HY5 PE=1 SV=1	3e-53	gi|470110394|ref|XP_004291469.1| PREDICTED: transcription factor HY5-like [Fragaria vesca subsp. vesca]	1e-84	D6MKH0_9ASPA/84-150 D6MKH0.1 PF00170.16;bZIP_1;	8e-35	[K] Transcription	-	-	GO:0005634(nucleus);GO:0003690(double-stranded DNA binding);GO:0046983(protein dimerization activity);GO:0043565(sequence-specific DNA binding);GO:0003700(sequence-specific DNA binding transcription factor activity);GO:0009740(gibberellic acid mediated signaling pathway);GO:0031539(positive regulation of anthocyanin metabolic process);GO:0042753(positive regulation of circadian rhythm);GO:0009585…	-	-	-
comp107695_c2_seq7	629	-	sp|O24646|HY5_ARATH Transcription factor HY5 OS=Arabidopsis thaliana GN=HY5 PE=1 SV=1	3e-48	gi|470110394|ref|XP_004291469.1| PREDICTED: transcription factor HY5-like [Fragaria vesca subsp. vesca]	3e-77	D6MKH0_9ASPA/84-150 D6MKH0.1 PF00170.16;bZIP_1;	6e-33	[K] Transcription	-	-	GO:0005634(nucleus);GO:0003690(double-stranded DNA binding);GO:0046983(protein dimerization activity);GO:0043565(sequence-specific DNA binding);GO:0003700(sequence-specific DNA binding transcription factor activity);GO:0009740(gibberellic acid mediated signaling pathway);GO:0031539(positive regulation of anthocyanin metabolic process);GO:0042753(positive regulation of circadian rhythm);GO:0009585…	-	-	-
comp113395_c0_seq6	1312	-	sp|Q9FNV9|MY113_ARATH Transcription factor MYB113 OS=Arabidopsis thaliana GN=MYB113 PE=1 SV=1	3e-59	gi|161878910|gb|ABX79947.1| R2R3 MYB transcription factor [Fragaria x ananassa]	1e-133	B5STZ8_FRAAN/8-55 B5STZ8.1 PF00249.26;Myb_DNA-binding;	4e-28	[K] Transcription	-	-	GO:0005634(nucleus);GO:0003677(DNA binding);GO:0007275(multicellular organismal development);GO:0031540(regulation of anthocyanin biosynthetic process);GO:0006355(regulation of transcription, DNA-dependent);GO:0009753(response to jasmonic acid stimulus);GO:0006351(transcription, DNA-dependent)	-	-	-
comp116466_c0_seq8	1341	-	sp|O49687|BH004_ARATH Transcription factor MYC4 OS=Arabidopsis thaliana GN=BHLH4 PE=2 SV=1	4e-94	gi|470128629|ref|XP_004300239.1| PREDICTED: transcription factor MYC2-like [Fragaria vesca subsp. vesca]	5e-178	Q5NB91_ORYSJ/457-505 Q5NB91.1 PF00010.21;HLH;	1e-23	-	-	-	GO:0005634(nucleus);GO:0043425(bHLH transcription factor binding);GO:0003677(DNA binding);GO:0009718(anthocyanin biosynthetic process);GO:0006952(defense response);GO:0045893(positive regulation of transcription, DNA-dependent);GO:0006351(transcription, DNA-dependent)	-	-	-
comp109292_c0_seq1	1237	-	sp|Q9FJA2|TT2_ARATH Transcription factor TT2 OS=Arabidopsis thaliana GN=TT2 PE=1 SV=1	2e-52	gi|470135775|ref|XP_004303684.1| PREDICTED: transcription factor TT2-like [Fragaria vesca subsp. vesca]	0	Q84U50_9ASPA/17-90 Q84U50.1 PF13921.1;Myb_DNA-bind_6;	5e-30	[K] Transcription	-	-	GO:0005634(nucleus);GO:0005524(ATP binding);GO:0003677(DNA binding);GO:0005515(protein binding);GO:0010023(proanthocyanidin biosynthetic process);GO:0006355(regulation of transcription, DNA-dependent);GO:0006351(transcription, DNA-dependent)	-	-	-
comp118358_c0_seq4	2724	-	sp|Q9FT81|TT8_ARATH Transcription factor TT8 OS=Arabidopsis thaliana GN=TT8 PE=1 SV=2	3e-95	gi|470108733|ref|XP_004290663.1| PREDICTED: transcription factor TT8-like [Fragaria vesca subsp. vesca]	0	G3GJ75_MALDO/11-194 G3GJ75.1 PF14215.1;bHLH-MYC_N;	9e-114	-	-	-	GO:0005634(nucleus);GO:0003677(DNA binding);GO:0005515(protein binding);GO:0009813(flavonoid biosynthetic process);GO:2000029(regulation of proanthocyanidin biosynthetic process);GO:0006355(regulation of transcription, DNA-dependent);GO:0006351(transcription, DNA-dependent);GO:0010026(trichome differentiation)	-	-	-
comp90800_c1_seq1	912	-	sp|Q9FE25|MYB75_ARATH Transcription factor MYB75 OS=Arabidopsis thaliana GN=MYB75 PE=1 SV=1	7e-39	gi|470104949|ref|XP_004288854.1| PREDICTED: transcription factor MYB113-like [Fragaria vesca subsp. vesca]	2e-59	B6ECG8_SOLPI/66-111 B6ECG8.1 PF00249.26;Myb_DNA-binding;	9e-23	[K] Transcription	-	-	GO:0005634(nucleus);GO:0003677(DNA binding);GO:0005515(protein binding);GO:0003700(sequence-specific DNA binding transcription factor activity);GO:0009718(anthocyanin biosynthetic process);GO:0050832(defense response to fungus);GO:0031540(regulation of anthocyanin biosynthetic process);GO:0019430(removal of superoxide radicals);GO:0009733(response to auxin stimulus);GO:0009723(response to ethylen…	-	-	-
comp99877_c2_seq2	2269	-	sp|Q9FJA2|TT2_ARATH Transcription factor TT2 OS=Arabidopsis thaliana GN=TT2 PE=1 SV=1	6e-21	gi|470126888|ref|XP_004299414.1| PREDICTED: anthocyanin regulatory C1 protein-like [Fragaria vesca subsp. vesca]	1e-69	F6H7P8_VITVI/128-216 F6H7P8.1 PF15072.1;DUF4539;	3e-16	[K] Transcription	-	-	GO:0005634(nucleus);GO:0005524(ATP binding);GO:0003677(DNA binding);GO:0005515(protein binding);GO:0010023(proanthocyanidin biosynthetic process);GO:0006355(regulation of transcription, DNA-dependent);GO:0006351(transcription, DNA-dependent)	-	-	-
comp99877_c2_seq3	2188	-	sp|Q9FJA2|TT2_ARATH Transcription factor TT2 OS=Arabidopsis thaliana GN=TT2 PE=1 SV=1	2e-20	gi|470126888|ref|XP_004299414.1| PREDICTED: anthocyanin regulatory C1 protein-like [Fragaria vesca subsp. vesca]	4e-69	F6H7P8_VITVI/128-216 F6H7P8.1 PF15072.1;DUF4539;	3e-16	[K] Transcription	-	-	GO:0005634(nucleus);GO:0005524(ATP binding);GO:0003677(DNA binding);GO:0005515(protein binding);GO:0010023(proanthocyanidin biosynthetic process);GO:0006355(regulation of transcription, DNA-dependent);GO:0006351(transcription, DNA-dependent)	-	-	-

## Sheet: Carotenoids
Sheet 2. All genes identified in carotenoid biosynthetic pathway.
Gene	Length	Definition	swiss_prot_des	swiss_prot_evalue	nr_des	nr_evalue	Pfam_des	Pfam_evalue	KOG_des	KEGG_des	KEGG_evalue	GO	KO	EC	Pathway
1-deoxy-D-xylulose-5-phosphate synthase (DXS)
comp110278_c0_seq5	2913	1-deoxy-D-xylulose-5-phosphate synthase	sp|Q6YU51|DXS2_ORYSJ Probable 1-deoxy-D-xylulose-5-phosphate synthase 2, chloroplastic OS=Oryza sativa subsp. japonica GN=Os07g0190000 PE=2 SV=1	0	gi|470106313|ref|XP_004289517.1| PREDICTED: probable 1-deoxy-D-xylulose-5-phosphate synthase 2, chloroplastic-like [Fragaria vesca subsp. vesca]	0	B6E973_STERE/70-355 B6E973.1 PF13292.1;DXP_synthase_N;	3e-165	[G] Carbohydrate transport and metabolism	vvi:100268079	0	-	K01662	EC:2.2.1.7	ko00900(Terpenoid backbone biosynthesis)
comp111998_c1_seq2	2438	1-deoxy-D-xylulose-5-phosphate synthase	sp|O78328|DXS_CAPAN Probable 1-deoxy-D-xylulose-5-phosphate synthase, chloroplastic OS=Capsicum annuum GN=TKT2 PE=2 SV=1	0	gi|470121451|ref|XP_004296782.1| PREDICTED: probable 1-deoxy-D-xylulose-5-phosphate synthase, chloroplastic-like [Fragaria vesca subsp. vesca]	0	D2CS41_TOBAC/74-359 D2CS41.1 PF13292.1;DXP_synthase_N;	0	[G] Carbohydrate transport and metabolism	vvi:100249323	0	GO:0009507(chloroplast);GO:0008661(1-deoxy-D-xylulose-5-phosphate synthase activity);GO:0016624(oxidoreductase activity, acting on the aldehyde or oxo group of donors, disulfide as acceptor);GO:0016114(terpenoid biosynthetic process);GO:0009228(thiamine biosynthetic process)	K01662	EC:2.2.1.7	ko00900(Terpenoid backbone biosynthesis)
comp110087_c0_seq1	219	-	-	-	gi|470106313|ref|XP_004289517.1| PREDICTED: probable 1-deoxy-D-xylulose-5-phosphate synthase 2, chloroplastic-like [Fragaria vesca subsp. vesca]	1e-14	-	-	-	-	-	-	-	-	-
1-deoxy-D-xylulose-5-phosphate reductoisomerase (DXR)
comp104668_c0_seq3	270	1-deoxy-D-xylulose-5-phosphate reductoisomerase	sp|Q8W250|DXR_ORYSJ 1-deoxy-D-xylulose 5-phosphate reductoisomerase, chloroplastic OS=Oryza sativa subsp. japonica GN=DXR PE=2 SV=2	2e-31	gi|470125915|ref|XP_004298943.1| PREDICTED: 1-deoxy-D-xylulose 5-phosphate reductoisomerase, chloroplastic-like [Fragaria vesca subsp. vesca]	2e-34	H6UQ82_ROSRU/78-206 H6UQ82.1 PF02670.11;DXP_reductoisom;	1e-43	-	pop:POPTR_733324	2e-31	GO:0030604(1-deoxy-D-xylulose-5-phosphate reductoisomerase activity);GO:0046872(metal ion binding)	K00099	EC:1.1.1.267	ko00900(Terpenoid backbone biosynthesis)
comp104668_c0_seq5	2540	1-deoxy-D-xylulose-5-phosphate reductoisomerase	sp|Q8W250|DXR_ORYSJ 1-deoxy-D-xylulose 5-phosphate reductoisomerase, chloroplastic OS=Oryza sativa subsp. japonica GN=DXR PE=2 SV=2	0	gi|470125915|ref|XP_004298943.1| PREDICTED: 1-deoxy-D-xylulose 5-phosphate reductoisomerase, chloroplastic-like [Fragaria vesca subsp. vesca]	0	B9IER9_POPTR/334-457 B9IER9.1 PF13288.1;DXPR_C;	6e-77	-	pop:POPTR_733324	0	GO:0030604(1-deoxy-D-xylulose-5-phosphate reductoisomerase activity);GO:0046872(metal ion binding)	K00099	EC:1.1.1.267	ko00900(Terpenoid backbone biosynthesis)
comp105975_c0_seq10	1065	1-deoxy-D-xylulose-5-phosphate reductoisomerase	sp|Q9XFS9|DXR_ARATH 1-deoxy-D-xylulose 5-phosphate reductoisomerase, chloroplastic OS=Arabidopsis thaliana GN=DXR PE=2 SV=2	3e-45	gi|470125915|ref|XP_004298943.1| PREDICTED: 1-deoxy-D-xylulose 5-phosphate reductoisomerase, chloroplastic-like [Fragaria vesca subsp. vesca]	2e-77	H6UQ82_ROSRU/78-206 H6UQ82.1 PF02670.11;DXP_reductoisom;	2e-22	-	pop:POPTR_733324	3e-63	GO:0009570(chloroplast stroma);GO:0030604(1-deoxy-D-xylulose-5-phosphate reductoisomerase activity);GO:0046872(metal ion binding);GO:0019288(isopentenyl diphosphate biosynthetic process, mevalonate-independent pathway);GO:0046686(response to cadmium ion)	K00099	EC:1.1.1.267	ko00900(Terpenoid backbone biosynthesis)
comp105975_c0_seq16	1505	1-deoxy-D-xylulose-5-phosphate reductoisomerase	sp|Q9XFS9|DXR_ARATH 1-deoxy-D-xylulose 5-phosphate reductoisomerase, chloroplastic OS=Arabidopsis thaliana GN=DXR PE=2 SV=2	4e-45	gi|470125915|ref|XP_004298943.1| PREDICTED: 1-deoxy-D-xylulose 5-phosphate reductoisomerase, chloroplastic-like [Fragaria vesca subsp. vesca]	2e-75	H6UQ82_ROSRU/78-206 H6UQ82.1 PF02670.11;DXP_reductoisom;	7e-22	-	pop:POPTR_733324	2e-61	GO:0009570(chloroplast stroma);GO:0030604(1-deoxy-D-xylulose-5-phosphate reductoisomerase activity);GO:0046872(metal ion binding);GO:0019288(isopentenyl diphosphate biosynthetic process, mevalonate-independent pathway);GO:0046686(response to cadmium ion)	K00099	EC:1.1.1.267	ko00900(Terpenoid backbone biosynthesis)
comp105975_c0_seq17	602	1-deoxy-D-xylulose-5-phosphate reductoisomerase	sp|Q9XFS9|DXR_ARATH 1-deoxy-D-xylulose 5-phosphate reductoisomerase, chloroplastic OS=Arabidopsis thaliana GN=DXR PE=2 SV=2	5e-35	gi|470125915|ref|XP_004298943.1| PREDICTED: 1-deoxy-D-xylulose 5-phosphate reductoisomerase, chloroplastic-like [Fragaria vesca subsp. vesca]	2e-59	-	-	-	pop:POPTR_733324	4e-47	GO:0009570(chloroplast stroma);GO:0030604(1-deoxy-D-xylulose-5-phosphate reductoisomerase activity);GO:0046872(metal ion binding);GO:0019288(isopentenyl diphosphate biosynthetic process, mevalonate-independent pathway);GO:0046686(response to cadmium ion)	K00099	EC:1.1.1.267	ko00900(Terpenoid backbone biosynthesis)
comp105975_c0_seq6	1277	1-deoxy-D-xylulose-5-phosphate reductoisomerase	sp|Q9XES0|DXR_MENPI 1-deoxy-D-xylulose 5-phosphate reductoisomerase, chloroplastic OS=Mentha piperita GN=DXR PE=2 SV=2	5e-39	gi|470125915|ref|XP_004298943.1| PREDICTED: 1-deoxy-D-xylulose 5-phosphate reductoisomerase, chloroplastic-like [Fragaria vesca subsp. vesca]	4e-55	H6UQ82_ROSRU/78-206 H6UQ82.1 PF02670.11;DXP_reductoisom;	4e-22	-	vvi:100248516	1e-44	GO:0009507(chloroplast);GO:0030604(1-deoxy-D-xylulose-5-phosphate reductoisomerase activity);GO:0046872(metal ion binding);GO:0008299(isoprenoid biosynthetic process)	K00099	EC:1.1.1.267	ko00900(Terpenoid backbone biosynthesis)
comp117395_c1_seq17	1024	1-deoxy-D-xylulose-5-phosphate reductoisomerase	sp|Q9XES0|DXR_MENPI 1-deoxy-D-xylulose 5-phosphate reductoisomerase, chloroplastic OS=Mentha piperita GN=DXR PE=2 SV=2	6e-41	gi|470125915|ref|XP_004298943.1| PREDICTED: 1-deoxy-D-xylulose 5-phosphate reductoisomerase, chloroplastic-like [Fragaria vesca subsp. vesca]	4e-61	H6UQ82_ROSRU/78-206 H6UQ82.1 PF02670.11;DXP_reductoisom;	3e-19	-	pop:POPTR_733324	5e-42	GO:0009507(chloroplast);GO:0030604(1-deoxy-D-xylulose-5-phosphate reductoisomerase activity);GO:0046872(metal ion binding);GO:0008299(isoprenoid biosynthetic process)	K00099	EC:1.1.1.267	ko00900(Terpenoid backbone biosynthesis)
comp141446_c0_seq1	224	1-deoxy-D-xylulose-5-phosphate reductoisomerase	sp|Q2NRL1|DXR_SODGM 1-deoxy-D-xylulose 5-phosphate reductoisomerase OS=Sodalis glossinidius (strain morsitans) GN=dxr PE=3 SV=1	8e-20	gi|496207055|ref|WP_008925638.1| 1-deoxy-D-xylulose 5-phosphate reductoisomerase [Pantoea sp. aB] gi|304356157|gb|EFM20523.1| 1-deoxy-D-xylulose 5-phosphate reductoisomerase [Pantoea sp. aB]	7e-24	E0LX64_9ENTR/4-132 E0LX64.1 PF02670.11;DXP_reductoisom;	5e-32	-	sgl:SG1939	5e-16	GO:0030604(1-deoxy-D-xylulose-5-phosphate reductoisomerase activity);GO:0046872(metal ion binding);GO:0008299(isoprenoid biosynthetic process)	K00099	EC:1.1.1.267	ko00900(Terpenoid backbone biosynthesis)
2-C-methyl-D-erythritol 4-phosphate cytidylyltransferase (CMS)
comp100207_c0_seq1	439	2-C-methyl-D-erythritol 4-phosphate cytidylyltransferase	sp|P69834|ISPD_ARATH 2-C-methyl-D-erythritol 4-phosphate cytidylyltransferase, chloroplastic OS=Arabidopsis thaliana GN=ISPD PE=1 SV=1	2e-22	gi|470128199|ref|XP_004300034.1| PREDICTED: 2-C-methyl-D-erythritol 4-phosphate cytidylyltransferase, chloroplastic-like [Fragaria vesca subsp. vesca]	1e-36	H6VLE2_SALMI/81-302 H6VLE2.1 PF01128.14;IspD;	1e-25	-	pop:POPTR_1113320	2e-26	GO:0009570(chloroplast stroma);GO:0050518(2-C-methyl-D-erythritol 4-phosphate cytidylyltransferase activity);GO:0019288(isopentenyl diphosphate biosynthetic process, mevalonate-independent pathway)	K00991	EC:2.7.7.60	ko00900(Terpenoid backbone biosynthesis)
comp100471_c0_seq21	1230	2-C-methyl-D-erythritol 4-phosphate cytidylyltransferase	sp|P69834|ISPD_ARATH 2-C-methyl-D-erythritol 4-phosphate cytidylyltransferase, chloroplastic OS=Arabidopsis thaliana GN=ISPD PE=1 SV=1	1e-41	gi|470128199|ref|XP_004300034.1| PREDICTED: 2-C-methyl-D-erythritol 4-phosphate cytidylyltransferase, chloroplastic-like [Fragaria vesca subsp. vesca]	2e-44	B3F8G6_NICLS/85-306 B3F8G6.1 PF01128.14;IspD;	3e-47	-	pop:POPTR_1113320	1e-45	GO:0009570(chloroplast stroma);GO:0050518(2-C-methyl-D-erythritol 4-phosphate cytidylyltransferase activity);GO:0019288(isopentenyl diphosphate biosynthetic process, mevalonate-independent pathway)	K00991	EC:2.7.7.60	ko00900(Terpenoid backbone biosynthesis)
comp100471_c0_seq9	341	2-C-methyl-D-erythritol 4-phosphate cytidylyltransferase	sp|Q5N8G1|ISPD_ORYSJ 2-C-methyl-D-erythritol 4-phosphate cytidylyltransferase, chloroplastic OS=Oryza sativa subsp. japonica GN=ISPD PE=2 SV=1	2e-26	gi|470128199|ref|XP_004300034.1| PREDICTED: 2-C-methyl-D-erythritol 4-phosphate cytidylyltransferase, chloroplastic-like [Fragaria vesca subsp. vesca]	4e-29	B9N0J7_POPTR/86-307 B9N0J7.1 PF01128.14;IspD;	3e-31	-	pop:POPTR_1113320	3e-30	-	K00991	EC:2.7.7.60	ko00900(Terpenoid backbone biosynthesis)
comp107177_c0_seq2	728	2-C-methyl-D-erythritol 4-phosphate cytidylyltransferase	sp|P69834|ISPD_ARATH 2-C-methyl-D-erythritol 4-phosphate cytidylyltransferase, chloroplastic OS=Arabidopsis thaliana GN=ISPD PE=1 SV=1	4e-34	gi|470128199|ref|XP_004300034.1| PREDICTED: 2-C-methyl-D-erythritol 4-phosphate cytidylyltransferase, chloroplastic-like [Fragaria vesca subsp. vesca]	3e-53	B9N0J7_POPTR/86-307 B9N0J7.1 PF01128.14;IspD;	1e-48	-	pop:POPTR_1113320	2e-47	GO:0009570(chloroplast stroma);GO:0050518(2-C-methyl-D-erythritol 4-phosphate cytidylyltransferase activity);GO:0019288(isopentenyl diphosphate biosynthetic process, mevalonate-independent pathway)	K00991	EC:2.7.7.60	ko00900(Terpenoid backbone biosynthesis)
comp107177_c0_seq4	1203	2-C-methyl-D-erythritol 4-phosphate cytidylyltransferase	sp|P69834|ISPD_ARATH 2-C-methyl-D-erythritol 4-phosphate cytidylyltransferase, chloroplastic OS=Arabidopsis thaliana GN=ISPD PE=1 SV=1	5e-79	gi|470128199|ref|XP_004300034.1| PREDICTED: 2-C-methyl-D-erythritol 4-phosphate cytidylyltransferase, chloroplastic-like [Fragaria vesca subsp. vesca]	2e-127	B9N0J7_POPTR/86-307 B9N0J7.1 PF01128.14;IspD;	2e-110	-	pop:POPTR_1113320	6e-109	GO:0009570(chloroplast stroma);GO:0050518(2-C-methyl-D-erythritol 4-phosphate cytidylyltransferase activity);GO:0019288(isopentenyl diphosphate biosynthetic process, mevalonate-independent pathway)	K00991	EC:2.7.7.60	ko00900(Terpenoid backbone biosynthesis)
comp107177_c0_seq5	1946	2-C-methyl-D-erythritol 4-phosphate cytidylyltransferase	sp|P69834|ISPD_ARATH 2-C-methyl-D-erythritol 4-phosphate cytidylyltransferase, chloroplastic OS=Arabidopsis thaliana GN=ISPD PE=1 SV=1	6e-58	gi|470128199|ref|XP_004300034.1| PREDICTED: 2-C-methyl-D-erythritol 4-phosphate cytidylyltransferase, chloroplastic-like [Fragaria vesca subsp. vesca]	3e-86	B9N0J7_POPTR/86-307 B9N0J7.1 PF01128.14;IspD;	5e-77	-	pop:POPTR_1113320	1e-75	GO:0009570(chloroplast stroma);GO:0050518(2-C-methyl-D-erythritol 4-phosphate cytidylyltransferase activity);GO:0019288(isopentenyl diphosphate biosynthetic process, mevalonate-independent pathway)	K00991	EC:2.7.7.60	ko00900(Terpenoid backbone biosynthesis)
comp107177_c0_seq7	910	2-C-methyl-D-erythritol 4-phosphate cytidylyltransferase	sp|P69834|ISPD_ARATH 2-C-methyl-D-erythritol 4-phosphate cytidylyltransferase, chloroplastic OS=Arabidopsis thaliana GN=ISPD PE=1 SV=1	1e-54	gi|470128199|ref|XP_004300034.1| PREDICTED: 2-C-methyl-D-erythritol 4-phosphate cytidylyltransferase, chloroplastic-like [Fragaria vesca subsp. vesca]	2e-90	B9N0J7_POPTR/86-307 B9N0J7.1 PF01128.14;IspD;	2e-78	-	pop:POPTR_1113320	5e-77	GO:0009570(chloroplast stroma);GO:0050518(2-C-methyl-D-erythritol 4-phosphate cytidylyltransferase activity);GO:0019288(isopentenyl diphosphate biosynthetic process, mevalonate-independent pathway)	K00991	EC:2.7.7.60	ko00900(Terpenoid backbone biosynthesis)
comp111389_c1_seq1	388	2-C-methyl-D-erythritol 4-phosphate cytidylyltransferase	-	-	gi|462422736|gb|EMJ26999.1| hypothetical protein PRUPE_ppa011267mg [Prunus persica]	1e-17	D7TGK2_VITVI/82-303 D7TGK2.1 PF01128.14;IspD;	1e-18	-	vvi:100247263	2e-15	-	K00991	EC:2.7.7.60	ko00900(Terpenoid backbone biosynthesis)
4-diphosphocytidyl-2-C-methyl-D-erythritol kinase (CMK)
comp100007_c0_seq18	2422	4-diphosphocytidyl-2-C-methyl-D-erythritol kinase	sp|P93841|ISPE_SOLLC 4-diphosphocytidyl-2-C-methyl-D-erythritol kinase, chloroplastic/chromoplastic (Fragment) OS=Solanum lycopersicum GN=ISPE PE=1 SV=1	4e-88	gi|470110953|ref|XP_004291721.1| PREDICTED: 4-diphosphocytidyl-2-C-methyl-D-erythritol kinase, chloroplastic/chromoplastic-like isoform 1 [Fragaria vesca subsp. vesca]	8e-103	B9GEN2_POPTR/217-293 B9GEN2.1 PF08544.8;GHMP_kinases_C;	1e-30	-	vvi:100261596	2e-88	GO:0009507(chloroplast);GO:0009509(chromoplast);GO:0050515(4-(cytidine 5'-diphospho)-2-C-methyl-D-erythritol kinase activity);GO:0005524(ATP binding);GO:0016114(terpenoid biosynthetic process)	K00919	EC:2.7.1.148	ko00900(Terpenoid backbone biosynthesis)
comp100007_c0_seq2	1643	4-diphosphocytidyl-2-C-methyl-D-erythritol kinase	sp|P93841|ISPE_SOLLC 4-diphosphocytidyl-2-C-methyl-D-erythritol kinase, chloroplastic/chromoplastic (Fragment) OS=Solanum lycopersicum GN=ISPE PE=1 SV=1	2e-177	gi|470110955|ref|XP_004291722.1| PREDICTED: 4-diphosphocytidyl-2-C-methyl-D-erythritol kinase, chloroplastic/chromoplastic-like isoform 2 [Fragaria vesca subsp. vesca]	0	B9GEN2_POPTR/217-293 B9GEN2.1 PF08544.8;GHMP_kinases_C;	5e-31	-	vvi:100261596	4e-172	GO:0009507(chloroplast);GO:0009509(chromoplast);GO:0050515(4-(cytidine 5'-diphospho)-2-C-methyl-D-erythritol kinase activity);GO:0005524(ATP binding);GO:0016114(terpenoid biosynthetic process)	K00919	EC:2.7.1.148	ko00900(Terpenoid backbone biosynthesis)
comp100638_c0_seq15	2284	4-diphosphocytidyl-2-C-methyl-D-erythritol kinase	sp|P93841|ISPE_SOLLC 4-diphosphocytidyl-2-C-methyl-D-erythritol kinase, chloroplastic/chromoplastic (Fragment) OS=Solanum lycopersicum GN=ISPE PE=1 SV=1	3e-51	gi|470110953|ref|XP_004291721.1| PREDICTED: 4-diphosphocytidyl-2-C-methyl-D-erythritol kinase, chloroplastic/chromoplastic-like isoform 1 [Fragaria vesca subsp. vesca]	2e-52	B9GEN2_POPTR/217-293 B9GEN2.1 PF08544.8;GHMP_kinases_C;	1e-30	-	vvi:100261596	3e-48	GO:0009507(chloroplast);GO:0009509(chromoplast);GO:0050515(4-(cytidine 5'-diphospho)-2-C-methyl-D-erythritol kinase activity);GO:0005524(ATP binding);GO:0016114(terpenoid biosynthetic process)	K00919	EC:2.7.1.148	ko00900(Terpenoid backbone biosynthesis)
comp100638_c0_seq8	2337	4-diphosphocytidyl-2-C-methyl-D-erythritol kinase	sp|P93841|ISPE_SOLLC 4-diphosphocytidyl-2-C-methyl-D-erythritol kinase, chloroplastic/chromoplastic (Fragment) OS=Solanum lycopersicum GN=ISPE PE=1 SV=1	7e-163	gi|470110953|ref|XP_004291721.1| PREDICTED: 4-diphosphocytidyl-2-C-methyl-D-erythritol kinase, chloroplastic/chromoplastic-like isoform 1 [Fragaria vesca subsp. vesca]	1e-169	B9GEN2_POPTR/217-293 B9GEN2.1 PF08544.8;GHMP_kinases_C;	1e-30	-	vvi:100261596	2e-158	GO:0009507(chloroplast);GO:0009509(chromoplast);GO:0050515(4-(cytidine 5'-diphospho)-2-C-methyl-D-erythritol kinase activity);GO:0005524(ATP binding);GO:0016114(terpenoid biosynthetic process)	K00919	EC:2.7.1.148	ko00900(Terpenoid backbone biosynthesis)
2-C-methyl-D-erythritol 2,4-cyclodiphosphate synthase (MCS)
comp107609_c0_seq2	1495	2-C-methyl-D-erythritol 2,4-cyclodiphosphate synthase	sp|Q9CAK8|ISPF_ARATH 2-C-methyl-D-erythritol 2,4-cyclodiphosphate synthase, chloroplastic OS=Arabidopsis thaliana GN=ISPF PE=1 SV=1	8e-86	gi|470125690|ref|XP_004298833.1| PREDICTED: 2-C-methyl-D-erythritol 2,4-cyclodiphosphate synthase, chloroplastic-like [Fragaria vesca subsp. vesca]	1e-145	D7KSX3_ARALL/75-231 D7KSX3.1 PF02542.11;YgbB;	8e-103	-	pop:POPTR_1074087	2e-105	GO:0009570(chloroplast stroma);GO:0008685(2-C-methyl-D-erythritol 2,4-cyclodiphosphate synthase activity);GO:0016117(carotenoid biosynthetic process);GO:0015995(chlorophyll biosynthetic process)	K01770	EC:4.6.1.12	ko00900(Terpenoid backbone biosynthesis)
isopentenyl-diphosphate delta-isomerase (IPI)
comp106476_c0_seq1	1262	isopentenyl-diphosphate delta-isomerase	sp|O48965|IDI2_CAMAC Isopentenyl-diphosphate Delta-isomerase II OS=Camptotheca acuminata GN=IPI2 PE=2 SV=1	1e-123	gi|470132591|ref|XP_004302163.1| PREDICTED: isopentenyl-diphosphate Delta-isomerase II-like [Fragaria vesca subsp. vesca]	0	B9IQ19_POPTR/52-204 B9IQ19.1 PF00293.23;NUDIX;	1e-99	[Q] Secondary metabolites biosynthesis, transport and catabolism	vvi:100241072	2e-156	GO:0016787(hydrolase activity);GO:0004452(isopentenyl-diphosphate delta-isomerase activity);GO:0046872(metal ion binding);GO:0015995(chlorophyll biosynthetic process);GO:0008299(isoprenoid biosynthetic process);GO:0015979(photosynthesis)	K01823	EC:5.3.3.2	ko00900(Terpenoid backbone biosynthesis)
geranyl diphosphate synthase (GGPS)
comp111696_c0_seq3	1944	-	sp|Q94ID7|GGPPS_HEVBR Geranylgeranyl pyrophosphate synthase, chloroplastic OS=Hevea brasiliensis GN=GGPS PE=1 SV=1	3e-173	gi|470129378|ref|XP_004300598.1| PREDICTED: geranylgeranyl pyrophosphate synthase, chloroplastic-like [Fragaria vesca subsp. vesca]	5e-177	C1KH04_ELAUM/101-361 C1KH04.1 PF00348.12;polyprenyl_synt;	3e-159	[H] Coenzyme transport and metabolism	-	-	GO:0009507(chloroplast);GO:0004161(dimethylallyltranstransferase activity);GO:0004311(farnesyltranstransferase activity);GO:0004337(geranyltranstransferase activity);GO:0046872(metal ion binding);GO:0016117(carotenoid biosynthetic process)	-	-	-
geranylgeranyl reductase (GGR)
comp107087_c0_seq1	1705	geranylgeranyl reductase	sp|Q9ZS34|CHLP_TOBAC Geranylgeranyl diphosphate reductase, chloroplastic OS=Nicotiana tabacum GN=CHLP PE=2 SV=1	0	gi|470126767|ref|XP_004299354.1| PREDICTED: geranylgeranyl diphosphate reductase, chloroplastic-like [Fragaria vesca subsp. vesca]	0	E2D5V0_SESIN/55-419 E2D5V0.1 PF07992.9;Pyr_redox_2;	0	-	pop:POPTR_569972	0	GO:0009507(chloroplast);GO:0005488(binding);GO:0045550(geranylgeranyl reductase activity);GO:0016628(oxidoreductase activity, acting on the CH-CH group of donors, NAD or NADP as acceptor);GO:0015995(chlorophyll biosynthetic process);GO:0033385(geranylgeranyl diphosphate metabolic process);GO:0015979(photosynthesis);GO:0033521(phytyl diphosphate biosynthetic process);GO:0010189(vitamin E biosynthe…	K10960	EC:1.3.1.83	ko00860(Porphyrin and chlorophyll metabolism);ko00900(Terpenoid backbone biosynthesis)
comp116839_c0_seq1	1954	-	sp|Q9ZS34|CHLP_TOBAC Geranylgeranyl diphosphate reductase, chloroplastic OS=Nicotiana tabacum GN=CHLP PE=2 SV=1	2e-171	gi|470145841|ref|XP_004308541.1| PREDICTED: geranylgeranyl diphosphate reductase, chloroplastic-like [Fragaria vesca subsp. vesca]	0	E2D5V0_SESIN/55-419 E2D5V0.1 PF07992.9;Pyr_redox_2;	4e-146	-	-	-	GO:0009507(chloroplast);GO:0005488(binding);GO:0045550(geranylgeranyl reductase activity);GO:0016628(oxidoreductase activity, acting on the CH-CH group of donors, NAD or NADP as acceptor);GO:0015995(chlorophyll biosynthetic process);GO:0033385(geranylgeranyl diphosphate metabolic process);GO:0015979(photosynthesis);GO:0033521(phytyl diphosphate biosynthetic process);GO:0010189(vitamin E biosynthe…	-	-	-
comp118069_c0_seq14	1460	-	sp|Q9ZS34|CHLP_TOBAC Geranylgeranyl diphosphate reductase, chloroplastic OS=Nicotiana tabacum GN=CHLP PE=2 SV=1	2e-150	gi|470145841|ref|XP_004308541.1| PREDICTED: geranylgeranyl diphosphate reductase, chloroplastic-like [Fragaria vesca subsp. vesca]	0	E2D5V0_SESIN/55-419 E2D5V0.1 PF07992.9;Pyr_redox_2;	5e-146	-	-	-	GO:0009507(chloroplast);GO:0005488(binding);GO:0045550(geranylgeranyl reductase activity);GO:0016628(oxidoreductase activity, acting on the CH-CH group of donors, NAD or NADP as acceptor);GO:0015995(chlorophyll biosynthetic process);GO:0033385(geranylgeranyl diphosphate metabolic process);GO:0015979(photosynthesis);GO:0033521(phytyl diphosphate biosynthetic process);GO:0010189(vitamin E biosynthe…	-	-	-
phytoene synthase (PSY)
comp109519_c0_seq12	2226	phytoene synthase	sp|Q9SSU8|PSY_DAUCA Phytoene synthase, chloroplastic OS=Daucus carota GN=PSY PE=2 SV=1	1e-127	gi|238836224|gb|ACR61392.1| phytoene synthase protein [Fragaria x ananassa]	2e-178	B9GT08_POPTR/18-278 B9GT08.1 PF00494.14;SQS_PSY;	2e-151	[I] Lipid transport and metabolism	vvi:100252385	1e-160	GO:0009507(chloroplast);GO:0016767(geranylgeranyl-diphosphate geranylgeranyltransferase activity);GO:0016117(carotenoid biosynthetic process)	K02291	EC:2.5.1.32	ko00906(Carotenoid biosynthesis)
comp109519_c0_seq6	1697	phytoene synthase	sp|Q9SSU8|PSY_DAUCA Phytoene synthase, chloroplastic OS=Daucus carota GN=PSY PE=2 SV=1	3e-129	gi|238836224|gb|ACR61392.1| phytoene synthase protein [Fragaria x ananassa]	0	B9GT08_POPTR/18-278 B9GT08.1 PF00494.14;SQS_PSY;	9e-156	[I] Lipid transport and metabolism	vvi:100252385	4e-165	GO:0009507(chloroplast);GO:0016767(geranylgeranyl-diphosphate geranylgeranyltransferase activity);GO:0016117(carotenoid biosynthetic process)	K02291	EC:2.5.1.32	ko00906(Carotenoid biosynthesis)
comp109519_c0_seq8	2126	phytoene synthase	sp|Q9SSU8|PSY_DAUCA Phytoene synthase, chloroplastic OS=Daucus carota GN=PSY PE=2 SV=1	4e-129	gi|238836224|gb|ACR61392.1| phytoene synthase protein [Fragaria x ananassa]	0	B9GT08_POPTR/18-278 B9GT08.1 PF00494.14;SQS_PSY;	9e-154	[I] Lipid transport and metabolism	vvi:100252385	5e-163	GO:0009507(chloroplast);GO:0016767(geranylgeranyl-diphosphate geranylgeranyltransferase activity);GO:0016117(carotenoid biosynthetic process)	K02291	EC:2.5.1.32	ko00906(Carotenoid biosynthesis)
comp110189_c0_seq10	2161	phytoene synthase	sp|Q9SSU8|PSY_DAUCA Phytoene synthase, chloroplastic OS=Daucus carota GN=PSY PE=2 SV=1	3e-129	gi|238836224|gb|ACR61392.1| phytoene synthase protein [Fragaria x ananassa]	2e-156	B9GT08_POPTR/18-278 B9GT08.1 PF00494.14;SQS_PSY;	2e-104	[I] Lipid transport and metabolism	vvi:100252385	3e-122	GO:0009507(chloroplast);GO:0016767(geranylgeranyl-diphosphate geranylgeranyltransferase activity);GO:0016117(carotenoid biosynthetic process)	K02291	EC:2.5.1.32	ko00906(Carotenoid biosynthesis)
comp110189_c0_seq11	731	phytoene synthase	sp|Q9SSU8|PSY_DAUCA Phytoene synthase, chloroplastic OS=Daucus carota GN=PSY PE=2 SV=1	8e-46	gi|238836224|gb|ACR61392.1| phytoene synthase protein [Fragaria x ananassa]	1e-87	PSY_DAUCA/118-378 Q9SSU8.1 PF00494.14;SQS_PSY;	4e-25	[I] Lipid transport and metabolism	vvi:100252385	1e-57	GO:0009507(chloroplast);GO:0016767(geranylgeranyl-diphosphate geranylgeranyltransferase activity);GO:0016117(carotenoid biosynthetic process)	K02291	EC:2.5.1.32	ko00906(Carotenoid biosynthesis)
comp110189_c0_seq5	1833	phytoene synthase	sp|Q9SSU8|PSY_DAUCA Phytoene synthase, chloroplastic OS=Daucus carota GN=PSY PE=2 SV=1	0	gi|238836224|gb|ACR61392.1| phytoene synthase protein [Fragaria x ananassa]	0	B9GT08_POPTR/18-278 B9GT08.1 PF00494.14;SQS_PSY;	3e-175	[I] Lipid transport and metabolism	vvi:100252385	0	GO:0009507(chloroplast);GO:0016767(geranylgeranyl-diphosphate geranylgeranyltransferase activity);GO:0016117(carotenoid biosynthetic process)	K02291	EC:2.5.1.32	ko00906(Carotenoid biosynthesis)
comp110189_c0_seq9	1288	phytoene synthase	sp|Q9SSU8|PSY_DAUCA Phytoene synthase, chloroplastic OS=Daucus carota GN=PSY PE=2 SV=1	2e-23	gi|238836224|gb|ACR61392.1| phytoene synthase protein [Fragaria x ananassa]	5e-64	PSY_DAUCA/118-378 Q9SSU8.1 PF00494.14;SQS_PSY;	1e-23	[I] Lipid transport and metabolism	vvi:100252385	2e-35	GO:0009507(chloroplast);GO:0016767(geranylgeranyl-diphosphate geranylgeranyltransferase activity);GO:0016117(carotenoid biosynthetic process)	K02291	EC:2.5.1.32	ko00906(Carotenoid biosynthesis)
comp141666_c0_seq1	259	-	sp|P37271|PSY_ARATH Phytoene synthase, chloroplastic OS=Arabidopsis thaliana GN=PSY1 PE=2 SV=2	5e-38	gi|470120189|ref|XP_004296190.1| PREDICTED: phytoene synthase, chloroplastic-like [Fragaria vesca subsp. vesca]	4e-45	B9GLH2_POPTR/12-272 B9GLH2.1 PF00494.14;SQS_PSY;	3e-51	[I] Lipid transport and metabolism	-	-	GO:0009507(chloroplast);GO:0016767(geranylgeranyl-diphosphate geranylgeranyltransferase activity);GO:0046905(phytoene synthase activity)	-	-	-
comp66201_c0_seq1	1486	phytoene synthase	sp|P37272|PSY_CAPAN Phytoene synthase, chloroplastic OS=Capsicum annuum GN=PSY1 PE=2 SV=1	0	gi|470106413|ref|XP_004289567.1| PREDICTED: phytoene synthase, chloroplastic-like [Fragaria vesca subsp. vesca]	0	E0XGY1_MANES/143-403 E0XGY1.1 PF00494.14;SQS_PSY;	5e-139	[I] Lipid transport and metabolism	vvi:100246195	0	GO:0009507(chloroplast);GO:0016767(geranylgeranyl-diphosphate geranylgeranyltransferase activity);GO:0016117(carotenoid biosynthetic process)	K02291	EC:2.5.1.32	ko00906(Carotenoid biosynthesis)
phytoene desaturase (PDS)
comp110404_c0_seq10	1136	phytoene dehydrogenase, phytoene desaturase	sp|Q07356|PDS_ARATH 15-cis-phytoene desaturase, chloroplastic/chromoplastic OS=Arabidopsis thaliana GN=PDS PE=1 SV=1	5e-86	gi|238836359|gb|ACR61393.1| phytoene desaturase protein [Fragaria x ananassa]	2e-104	C5I8Q1_FRAAN/106-548 C5I8Q1.1 PF01593.19;Amino_oxidase;	1e-65	[Q] Secondary metabolites biosynthesis, transport and catabolism	pop:POPTR_1099624	6e-74	GO:0009941(chloroplast envelope);GO:0009509(chromoplast);GO:0016705(oxidoreductase activity, acting on paired donors, with incorporation or reduction of molecular oxygen);GO:0016166(phytoene dehydrogenase activity);GO:0016117(carotenoid biosynthetic process)	K02293	EC:1.14.99.-	ko00906(Carotenoid biosynthesis)
comp110404_c0_seq12	2448	phytoene dehydrogenase, phytoene desaturase	sp|P28554|CRTI_SOLLC Phytoene dehydrogenase, chloroplastic/chromoplastic OS=Solanum lycopersicum GN=PDS PE=2 SV=1	0	gi|238836359|gb|ACR61393.1| phytoene desaturase protein [Fragaria x ananassa]	0	C5I8Q1_FRAAN/106-548 C5I8Q1.1 PF01593.19;Amino_oxidase;	0	[Q] Secondary metabolites biosynthesis, transport and catabolism	vvi:100240685	0	GO:0009507(chloroplast);GO:0009509(chromoplast);GO:0016705(oxidoreductase activity, acting on paired donors, with incorporation or reduction of molecular oxygen);GO:0016117(carotenoid biosynthetic process)	K02293	EC:1.14.99.-	ko00906(Carotenoid biosynthesis)
comp141714_c0_seq1	223	-	-	-	gi|337747202|ref|YP_004641364.1| phytoene dehydrogenase [Paenibacillus mucilaginosus KNP414] gi|511629779|ref|YP_006189982.2| phytoene desaturase [Paenibacillus mucilaginosus K02] gi|503682579|ref|WP_013916655.1| phytoene desaturase [Paenibacillus mucilaginosus] gi|336298391|gb|AEI41494.1| phytoene dehydrogenase [Paenibacillus mucilaginosus KNP414] gi|511205596|gb|AFH62217.2| phytoene desaturase …	4e-21	F8F5T0_PAEMK/13-486 F8F5T0.1 PF01593.19;Amino_oxidase;	5e-26	-	-	-	-	-	-	-
comp98283_c0_seq1	1542	-	-	-	gi|470112837|ref|XP_004292636.1| PREDICTED: phytoene dehydrogenase, chloroplastic/chromoplastic-like [Fragaria vesca subsp. vesca]	0	F6I0Y5_VITVI/48-484 F6I0Y5.1 PF01593.19;Amino_oxidase;	2e-138	-	-	-	-	-	-	-
comp98283_c0_seq3	1954	-	-	-	gi|470112837|ref|XP_004292636.1| PREDICTED: phytoene dehydrogenase, chloroplastic/chromoplastic-like [Fragaria vesca subsp. vesca]	0	F6I0Y5_VITVI/48-484 F6I0Y5.1 PF01593.19;Amino_oxidase;	8e-120	-	-	-	-	-	-	-
comp98283_c0_seq4	1981	-	-	-	gi|470112837|ref|XP_004292636.1| PREDICTED: phytoene dehydrogenase, chloroplastic/chromoplastic-like [Fragaria vesca subsp. vesca]	0	F6I0Y5_VITVI/48-484 F6I0Y5.1 PF01593.19;Amino_oxidase;	1e-120	-	-	-	-	-	-	-
comp98283_c0_seq8	1569	-	-	-	gi|470112837|ref|XP_004292636.1| PREDICTED: phytoene dehydrogenase, chloroplastic/chromoplastic-like [Fragaria vesca subsp. vesca]	0	F6I0Y5_VITVI/48-484 F6I0Y5.1 PF01593.19;Amino_oxidase;	3e-139	-	-	-	-	-	-	-
comp99208_c0_seq1	475	-	-	-	gi|470112837|ref|XP_004292636.1| PREDICTED: phytoene dehydrogenase, chloroplastic/chromoplastic-like [Fragaria vesca subsp. vesca]	2e-40	B9H1K6_POPTR/53-108 B9H1K6.1 PF13450.1;NAD_binding_8;	6e-18	-	-	-	-	-	-	-
comp99208_c0_seq2	1668	-	-	-	gi|470112837|ref|XP_004292636.1| PREDICTED: phytoene dehydrogenase, chloroplastic/chromoplastic-like [Fragaria vesca subsp. vesca]	8e-140	F6I0Y5_VITVI/48-484 F6I0Y5.1 PF01593.19;Amino_oxidase;	1e-80	-	-	-	-	-	-	-
comp99208_c0_seq5	1695	-	-	-	gi|470112837|ref|XP_004292636.1| PREDICTED: phytoene dehydrogenase, chloroplastic/chromoplastic-like [Fragaria vesca subsp. vesca]	3e-140	F6I0Y5_VITVI/48-484 F6I0Y5.1 PF01593.19;Amino_oxidase;	1e-81	-	-	-	-	-	-	-
zeta-carotene isomerase (Z-ISO)
comp105943_c2_seq2	1651	-	sp|B4FHU1|ZCIS_MAIZE 15-cis-zeta-carotene isomerase, chloroplastic OS=Zea mays PE=1 SV=1	4e-92	gi|470142975|ref|XP_004307164.1| PREDICTED: glutathione transferase GST 23-like [Fragaria vesca subsp. vesca]	2e-157	I1LN52_SOYBN/141-365 I1LN52.1 PF07298.6;NnrU;	8e-115	-	-	-	-	-	-	-
comp106288_c0_seq1	1495	-	sp|Q9SAC0|ZCIS_ARATH 15-cis-zeta-carotene isomerase, chloroplastic OS=Arabidopsis thaliana GN=Z-ISO PE=1 SV=1	6e-142	gi|470124046|ref|XP_004298028.1| PREDICTED: 15-cis-zeta-carotene isomerase, chloroplastic-like [Fragaria vesca subsp. vesca]	0	B9IA93_POPTR/146-370 B9IA93.1 PF07298.6;NnrU;	3e-142	-	-	-	-	-	-	-
comp106288_c0_seq3	840	-	sp|Q9SAC0|ZCIS_ARATH 15-cis-zeta-carotene isomerase, chloroplastic OS=Arabidopsis thaliana GN=Z-ISO PE=1 SV=1	4e-21	gi|470124046|ref|XP_004298028.1| PREDICTED: 15-cis-zeta-carotene isomerase, chloroplastic-like [Fragaria vesca subsp. vesca]	2e-73	-	-	-	-	-	-	-	-	-
zeta-carotene desaturase (ZDS)
comp117631_c0_seq4	3191	-	sp|Q9FV46|ZDS_TARER Zeta-carotene desaturase, chloroplastic/chromoplastic OS=Tagetes erecta PE=2 SV=1	0	gi|470132305|ref|XP_004302025.1| PREDICTED: zeta-carotene desaturase, chloroplastic/chromoplastic-like [Fragaria vesca subsp. vesca]	0	B9RES0_RICCO/89-554 B9RES0.1 PF01593.19;Amino_oxidase;	0	[Q] Secondary metabolites biosynthesis, transport and catabolism	-	-	GO:0009507(chloroplast);GO:0009509(chromoplast);GO:0016719(carotene 7,8-desaturase activity);GO:0016117(carotenoid biosynthetic process)	-	-	-
carotenoid isomerase (CRTISO)
comp104685_c0_seq16	2482	carotenoid isomerase	sp|Q2VEX9|CRTSO_DAUCA Prolycopene isomerase, chloroplastic OS=Daucus carota GN=CRTISO PE=2 SV=1	0	gi|470135141|ref|XP_004303382.1| PREDICTED: prolycopene isomerase, chloroplastic-like [Fragaria vesca subsp. vesca]	0	Q2JLX9_SYNJB/227-512 Q2JLX9.1 PF01266.19;DAO;	1e-93	[H] Coenzyme transport and metabolism	vvi:100263250	0	GO:0031969(chloroplast membrane);GO:0016853(isomerase activity);GO:0016491(oxidoreductase activity);GO:0016117(carotenoid biosynthetic process)	K09835	EC:5.-.-.-	ko00906(Carotenoid biosynthesis)
comp104685_c0_seq4	1161	carotenoid isomerase	sp|Q8S4R4|CRTSO_SOLLC Prolycopene isomerase, chloroplastic OS=Solanum lycopersicum GN=CRTISO PE=1 SV=1	2e-140	gi|470135141|ref|XP_004303382.1| PREDICTED: prolycopene isomerase, chloroplastic-like [Fragaria vesca subsp. vesca]	4e-157	Q2JLX9_SYNJB/227-512 Q2JLX9.1 PF01266.19;DAO;	9e-99	[H] Coenzyme transport and metabolism	vvi:100263250	2e-144	GO:0031969(chloroplast membrane);GO:0016853(isomerase activity);GO:0016491(oxidoreductase activity);GO:0016117(carotenoid biosynthetic process)	K09835	EC:5.-.-.-	ko00906(Carotenoid biosynthesis)
comp104685_c0_seq7	2330	carotenoid isomerase	sp|Q2VEX9|CRTSO_DAUCA Prolycopene isomerase, chloroplastic OS=Daucus carota GN=CRTISO PE=2 SV=1	0	gi|470135141|ref|XP_004303382.1| PREDICTED: prolycopene isomerase, chloroplastic-like [Fragaria vesca subsp. vesca]	0	Q2JLX9_SYNJB/227-512 Q2JLX9.1 PF01266.19;DAO;	9e-88	[H] Coenzyme transport and metabolism	vvi:100263250	0	GO:0031969(chloroplast membrane);GO:0016853(isomerase activity);GO:0016491(oxidoreductase activity);GO:0016117(carotenoid biosynthetic process)	K09835	EC:5.-.-.-	ko00906(Carotenoid biosynthesis)
comp138584_c0_seq1	494	-	-	-	gi|470131346|ref|XP_004301557.1| PREDICTED: prolycopene isomerase, chloroplastic-like [Fragaria vesca subsp. vesca]	3e-89	C1N702_MICPC/1-282 C1N702.1 PF01593.19;Amino_oxidase;	4e-46	[H] Coenzyme transport and metabolism	-	-	-	-	-	-
comp16024_c0_seq1	415	-	-	-	gi|470131346|ref|XP_004301557.1| PREDICTED: prolycopene isomerase, chloroplastic-like [Fragaria vesca subsp. vesca]	3e-70	G6FVS1_9CYAN/209-494 G6FVS1.1 PF01266.19;DAO;	1e-33	[H] Coenzyme transport and metabolism	-	-	-	-	-	-
comp34931_c0_seq1	289	-	-	-	gi|470131346|ref|XP_004301557.1| PREDICTED: prolycopene isomerase, chloroplastic-like [Fragaria vesca subsp. vesca]	3e-30	-	-	-	-	-	-	-	-	-
comp47919_c0_seq1	629	-	-	-	gi|470131346|ref|XP_004301557.1| PREDICTED: prolycopene isomerase, chloroplastic-like [Fragaria vesca subsp. vesca]	4e-99	G6FVS1_9CYAN/209-494 G6FVS1.1 PF01266.19;DAO;	1e-59	[H] Coenzyme transport and metabolism	-	-	-	-	-	-
comp82799_c1_seq1	421	-	-	-	gi|470131346|ref|XP_004301557.1| PREDICTED: prolycopene isomerase, chloroplastic-like [Fragaria vesca subsp. vesca]	5e-67	C5WT16_SORBI/77-148 C5WT16.1 PF13450.1;NAD_binding_8;	9e-31	[H] Coenzyme transport and metabolism	-	-	-	-	-	-
comp117652_c0_seq12	1820	-	sp|Q7XA78|D27_ARATH Beta-carotene isomerase D27, chloroplastic OS=Arabidopsis thaliana GN=D27 PE=1 SV=1	1e-33	gi|470106359|ref|XP_004289540.1| PREDICTED: uncharacterized protein LOC101314896 [Fragaria vesca subsp. vesca]	6e-162	B9GSU3_POPTR/98-182 B9GSU3.1 PF13225.1;DUF4033;	2e-53	[R] General function prediction only	-	-	-	-	-	-
comp117652_c0_seq33	1777	-	sp|Q7XA78|D27_ARATH Beta-carotene isomerase D27, chloroplastic OS=Arabidopsis thaliana GN=D27 PE=1 SV=1	1e-33	gi|470106359|ref|XP_004289540.1| PREDICTED: uncharacterized protein LOC101314896 [Fragaria vesca subsp. vesca]	0	B9GSU3_POPTR/98-182 B9GSU3.1 PF13225.1;DUF4033;	2e-53	[R] General function prediction only	-	-	-	-	-	-
comp117652_c0_seq43	1847	-	sp|Q7XA78|D27_ARATH Beta-carotene isomerase D27, chloroplastic OS=Arabidopsis thaliana GN=D27 PE=1 SV=1	2e-33	gi|470106359|ref|XP_004289540.1| PREDICTED: uncharacterized protein LOC101314896 [Fragaria vesca subsp. vesca]	8e-162	B9GSU3_POPTR/98-182 B9GSU3.1 PF13225.1;DUF4033;	3e-53	[R] General function prediction only	-	-	-	-	-	-
comp138551_c0_seq1	297	-	sp|Q7XA78|D27_ARATH Beta-carotene isomerase D27, chloroplastic OS=Arabidopsis thaliana GN=D27 PE=1 SV=1	5e-44	gi|470108690|ref|XP_004290643.1| PREDICTED: uncharacterized protein LOC101311145 [Fragaria vesca subsp. vesca]	1e-53	B9GS84_POPTR/79-162 B9GS84.1 PF13225.1;DUF4033;	3e-43	-	-	-	-	-	-	-
comp141917_c0_seq1	319	-	sp|Q7XA78|D27_ARATH Beta-carotene isomerase D27, chloroplastic OS=Arabidopsis thaliana GN=D27 PE=1 SV=1	3e-42	gi|470108690|ref|XP_004290643.1| PREDICTED: uncharacterized protein LOC101311145 [Fragaria vesca subsp. vesca]	5e-57	B9S4R1_RICCO/121-202 B9S4R1.1 PF13225.1;DUF4033;	7e-31	-	-	-	-	-	-	-
Carotene epsilon-monooxygenase
comp102493_c1_seq2	1776	-	sp|Q6TBX7|LUT1_ARATH Carotene epsilon-monooxygenase, chloroplastic OS=Arabidopsis thaliana GN=CYP97C1 PE=1 SV=1	0	gi|470140892|ref|XP_004306170.1| PREDICTED: carotene epsilon-monooxygenase, chloroplastic-like [Fragaria vesca subsp. vesca]	0	B9S0A8_RICCO/89-536 B9S0A8.1 PF00067.17;p450;	0	[Q] Secondary metabolites biosynthesis, transport and catabolism ;[I] Lipid transport and metabolism	-	-	GO:0031969(chloroplast membrane);GO:0009055(electron carrier activity);GO:0020037(heme binding);GO:0004497(monooxygenase activity);GO:0016705(oxidoreductase activity, acting on paired donors, with incorporation or reduction of molecular oxygen);GO:0016117(carotenoid biosynthetic process)	-	-	-
lycopene beta cyclase (LCYB)
comp105524_c0_seq4	2077	lycopene beta cyclase	sp|Q43503|LCYB_SOLLC Lycopene beta cyclase, chloroplastic OS=Solanum lycopersicum GN=LCY1 PE=1 SV=1	0	gi|470135612|ref|XP_004303607.1| PREDICTED: lycopene beta cyclase, chloroplastic-like [Fragaria vesca subsp. vesca]	0	G4XU59_CITSI/88-481 G4XU59.1 PF05834.7;Lycopene_cycl;	0	-	vvi:100252133	0	GO:0009507(chloroplast);GO:0016705(oxidoreductase activity, acting on paired donors, with incorporation or reduction of molecular oxygen);GO:0016117(carotenoid biosynthetic process)	K06443	EC:1.14.-.-	ko00906(Carotenoid biosynthesis)
Lycopene epsilon cyclase (LCYE)
comp88987_c0_seq1	2011	-	sp|Q38932|LCYE_ARATH Lycopene epsilon cyclase, chloroplastic OS=Arabidopsis thaliana GN=LUT2 PE=1 SV=2	0	gi|470102278|ref|XP_004287582.1| PREDICTED: lycopene epsilon cyclase, chloroplastic-like [Fragaria vesca subsp. vesca]	0	I1L1L3_SOYBN/112-510 I1L1L3.1 PF05834.7;Lycopene_cycl;	0	-	-	-	GO:0031969(chloroplast membrane);GO:0016021(integral to membrane);GO:0045435(lycopene epsilon cyclase activity);GO:0016705(oxidoreductase activity, acting on paired donors, with incorporation or reduction of molecular oxygen);GO:0016117(carotenoid biosynthetic process)	-	-	-
comp105236_c0_seq1	2063	-	-	-	gi|508701403|gb|EOX93299.1| Lycopene beta/epsilon cyclase protein isoform 2 [Theobroma cacao]	0	Q0WVA1_ARATH/113-406 Q0WVA1.1 PF05834.7;Lycopene_cycl;	4e-77	-	-	-	-	-	-	-
comp105236_c0_seq2	2278	-	-	-	gi|508701402|gb|EOX93298.1| Lycopene beta/epsilon cyclase protein isoform 1 [Theobroma cacao]	2e-117	Q0WVA1_ARATH/113-406 Q0WVA1.1 PF05834.7;Lycopene_cycl;	4e-59	-	-	-	-	-	-	-
zeaxanthin epoxidase (ZEP)
comp108626_c0_seq2	2409	-	sp|O81360|ABA2_PRUAR Zeaxanthin epoxidase, chloroplastic OS=Prunus armeniaca PE=2 SV=1	0	gi|488497669|gb|AFR11774.2| zeaxanthin epoxidase [Fragaria x ananassa]	0	D3KZ28_CITUN/77-432 D3KZ28.1 PF01494.14;FAD_binding_3;	0	[C] Energy production and conversion ;[R] General function prediction only	-	-	GO:0009507(chloroplast);GO:0016020(membrane);GO:0052663(antheraxanthin epoxidase activity);GO:0009540(zeaxanthin epoxidase [overall] activity);GO:0052662(zeaxanthin epoxidase activity);GO:0009688(abscisic acid biosynthetic process)	-	-	-
violaxanthin de-epoxidase (VDE)
comp100864_c0_seq2	648	-	-	-	gi|470132514|ref|XP_004302125.1| PREDICTED: violaxanthin de-epoxidase, chloroplastic-like [Fragaria vesca subsp. vesca]	5e-73	-	-	-	-	-	-	-	-	-
comp100864_c1_seq2	1698	-	sp|Q39249|VDE_ARATH Violaxanthin de-epoxidase, chloroplastic OS=Arabidopsis thaliana GN=VDE1 PE=1 SV=1	0	gi|470132514|ref|XP_004302125.1| PREDICTED: violaxanthin de-epoxidase, chloroplastic-like [Fragaria vesca subsp. vesca]	0	D7TDW3_VITVI/157-354 D7TDW3.1 PF07137.6;VDE;	4e-122	-	-	-	GO:0009535(chloroplast thylakoid membrane);GO:0031977(thylakoid lumen);GO:0005515(protein binding);GO:0046422(violaxanthin de-epoxidase activity);GO:0015994(chlorophyll metabolic process);GO:0006631(fatty acid metabolic process);GO:0009408(response to heat);GO:0010028(xanthophyll cycle)	-	-	-
comp101834_c0_seq10	3294	violaxanthin de-epoxidase	sp|Q39249|VDE_ARATH Violaxanthin de-epoxidase, chloroplastic OS=Arabidopsis thaliana GN=VDE1 PE=1 SV=1	0	gi|470138101|ref|XP_004304797.1| PREDICTED: serine/threonine-protein kinase At3g07070-like [Fragaria vesca subsp. vesca]	0	B9S537_RICCO/106-380 B9S537.1 PF00069.20;Pkinase;	3e-135	-	ath:AT1G08550	0	GO:0009535(chloroplast thylakoid membrane);GO:0031977(thylakoid lumen);GO:0005515(protein binding);GO:0046422(violaxanthin de-epoxidase activity);GO:0015994(chlorophyll metabolic process);GO:0006631(fatty acid metabolic process);GO:0009408(response to heat);GO:0010028(xanthophyll cycle)	K09839	EC:1.10.99.3	ko00906(Carotenoid biosynthesis)
comp101834_c0_seq14	3318	violaxanthin de-epoxidase	sp|Q39249|VDE_ARATH Violaxanthin de-epoxidase, chloroplastic OS=Arabidopsis thaliana GN=VDE1 PE=1 SV=1	0	gi|470138101|ref|XP_004304797.1| PREDICTED: serine/threonine-protein kinase At3g07070-like [Fragaria vesca subsp. vesca]	0	B9S537_RICCO/106-380 B9S537.1 PF00069.20;Pkinase;	3e-135	-	ath:AT1G08550	0	GO:0009535(chloroplast thylakoid membrane);GO:0031977(thylakoid lumen);GO:0005515(protein binding);GO:0046422(violaxanthin de-epoxidase activity);GO:0015994(chlorophyll metabolic process);GO:0006631(fatty acid metabolic process);GO:0009408(response to heat);GO:0010028(xanthophyll cycle)	K09839	EC:1.10.99.3	ko00906(Carotenoid biosynthesis)
acetyl-CoA C-acetyltransferase (ACAT)
comp103345_c1_seq2	1723	acetyl-CoA C-acetyltransferase	sp|Q8S4Y1|THIC1_ARATH Acetyl-CoA acetyltransferase, cytosolic 1 OS=Arabidopsis thaliana GN=AAT1 PE=2 SV=1	0	gi|470135543|ref|XP_004303573.1| PREDICTED: probable acetyl-CoA acetyltransferase, cytosolic 2-like [Fragaria vesca subsp. vesca]	0	B9IAU7_POPTR/8-271 B9IAU7.1 PF00108.18;Thiolase_N;	2e-167	[I] Lipid transport and metabolism	pop:POPTR_732472	0	GO:0005829(cytosol);GO:0005777(peroxisome);GO:0005886(plasma membrane);GO:0003985(acetyl-CoA C-acetyltransferase activity);GO:0046872(metal ion binding);GO:0008299(isoprenoid biosynthetic process)	K00626	EC:2.3.1.9	ko00071(Fatty acid metabolism);ko00072(Synthesis and degradation of ketone bodies);ko00280(Valine, leucine and isoleucine degradation);ko00310(Lysine degradation);ko00380(Tryptophan metabolism);ko00620(Pyruvate metabolism);ko00632(Benzoate degradation via CoA ligation);ko00640(Propanoate metabolism);ko00650(Butanoate metabolism);ko00900(Terpenoid backbone biosynthesis);ko02020(Two-component syste…
comp109332_c0_seq4	1712	acetyl-CoA C-acetyltransferase	sp|Q8S4Y1|THIC1_ARATH Acetyl-CoA acetyltransferase, cytosolic 1 OS=Arabidopsis thaliana GN=AAT1 PE=2 SV=1	3e-173	gi|470114409|ref|XP_004293407.1| PREDICTED: probable acetyl-CoA acetyltransferase, cytosolic 2-like [Fragaria vesca subsp. vesca]	0	F5CLC4_CATRO/12-275 F5CLC4.1 PF00108.18;Thiolase_N;	2e-147	[I] Lipid transport and metabolism	pop:POPTR_652350	0	GO:0005829(cytosol);GO:0005777(peroxisome);GO:0005886(plasma membrane);GO:0003985(acetyl-CoA C-acetyltransferase activity);GO:0046872(metal ion binding);GO:0008299(isoprenoid biosynthetic process)	K00626	EC:2.3.1.9	ko00071(Fatty acid metabolism);ko00072(Synthesis and degradation of ketone bodies);ko00280(Valine, leucine and isoleucine degradation);ko00310(Lysine degradation);ko00380(Tryptophan metabolism);ko00620(Pyruvate metabolism);ko00632(Benzoate degradation via CoA ligation);ko00640(Propanoate metabolism);ko00650(Butanoate metabolism);ko00900(Terpenoid backbone biosynthesis);ko02020(Two-component syste…
comp109332_c0_seq9	1785	acetyl-CoA C-acetyltransferase	sp|Q8S4Y1|THIC1_ARATH Acetyl-CoA acetyltransferase, cytosolic 1 OS=Arabidopsis thaliana GN=AAT1 PE=2 SV=1	4e-168	gi|470114409|ref|XP_004293407.1| PREDICTED: probable acetyl-CoA acetyltransferase, cytosolic 2-like [Fragaria vesca subsp. vesca]	0	F5CLC4_CATRO/12-275 F5CLC4.1 PF00108.18;Thiolase_N;	3e-114	[I] Lipid transport and metabolism	pop:POPTR_652350	4e-177	GO:0005829(cytosol);GO:0005777(peroxisome);GO:0005886(plasma membrane);GO:0003985(acetyl-CoA C-acetyltransferase activity);GO:0046872(metal ion binding);GO:0008299(isoprenoid biosynthetic process)	K00626	EC:2.3.1.9	ko00071(Fatty acid metabolism);ko00072(Synthesis and degradation of ketone bodies);ko00280(Valine, leucine and isoleucine degradation);ko00310(Lysine degradation);ko00380(Tryptophan metabolism);ko00620(Pyruvate metabolism);ko00632(Benzoate degradation via CoA ligation);ko00640(Propanoate metabolism);ko00650(Butanoate metabolism);ko00900(Terpenoid backbone biosynthesis);ko02020(Two-component syste…
hydroxymethylglutaryl-CoA synthase (HMGCS)
comp112067_c0_seq2	1948	hydroxymethylglutaryl-CoA synthase	sp|P54873|HMCS_ARATH Hydroxymethylglutaryl-CoA synthase OS=Arabidopsis thaliana GN=HMGS PE=1 SV=2	0	gi|470125505|ref|XP_004298742.1| PREDICTED: LOW QUALITY PROTEIN: hydroxymethylglutaryl-CoA synthase-like [Fragaria vesca subsp. vesca]	0	B9RC08_RICCO/175-449 B9RC08.1 PF08540.5;HMG_CoA_synt_C;	5e-162	[I] Lipid transport and metabolism	pop:POPTR_646543	0	GO:0005829(cytosol);GO:0009506(plasmodesma);GO:0004421(hydroxymethylglutaryl-CoA synthase activity);GO:0019287(isopentenyl diphosphate biosynthetic process, mevalonate pathway);GO:0016126(sterol biosynthetic process)	K01641	EC:2.3.3.10	ko00072(Synthesis and degradation of ketone bodies);ko00280(Valine, leucine and isoleucine degradation);ko00650(Butanoate metabolism);ko00900(Terpenoid backbone biosynthesis)
comp142476_c0_seq1	212	hydroxymethylglutaryl-CoA synthase	sp|P54868|HMCS2_HUMAN Hydroxymethylglutaryl-CoA synthase, mitochondrial OS=Homo sapiens GN=HMGCS2 PE=1 SV=1	2e-46	gi|260656028|ref|NP_001159579.1| hydroxymethylglutaryl-CoA synthase, mitochondrial isoform 2 precursor [Homo sapiens] gi|221044744|dbj|BAH14049.1| unnamed protein product [Homo sapiens]	1e-37	F6ZJI7_CALJA/184-464 F6ZJI7.1 PF08540.5;HMG_CoA_synt_C;	3e-46	[I] Lipid transport and metabolism	hsa:3158	4e-38	GO:0005759(mitochondrial matrix);GO:0004421(hydroxymethylglutaryl-CoA synthase activity);GO:0043441(acetoacetic acid biosynthetic process);GO:0006695(cholesterol biosynthetic process);GO:0008299(isoprenoid biosynthetic process);GO:0046951(ketone body biosynthetic process)	K01641	EC:2.3.3.10	ko00072(Synthesis and degradation of ketone bodies);ko00280(Valine, leucine and isoleucine degradation);ko00650(Butanoate metabolism);ko00900(Terpenoid backbone biosynthesis)
Mevalonate kinase (MVK)
comp108317_c1_seq2	1628	mevalonate kinase	sp|P46086|KIME_ARATH Mevalonate kinase OS=Arabidopsis thaliana GN=At5g27450 PE=2 SV=1	3e-133	gi|470133157|ref|XP_004302439.1| PREDICTED: mevalonate kinase-like [Fragaria vesca subsp. vesca]	0	B3F8H3_NICLS/173-252 B3F8H3.1 PF08544.8;GHMP_kinases_C;	3e-42	[I] Lipid transport and metabolism	vvi:100251148	0	GO:0005829(cytosol);GO:0005524(ATP binding);GO:0004496(mevalonate kinase activity);GO:0008299(isoprenoid biosynthetic process);GO:0016126(sterol biosynthetic process)	K00869	EC:2.7.1.36	ko00900(Terpenoid backbone biosynthesis);ko04146(Peroxisome)
phosphomevalonate kinase (PMVK)
comp109019_c0_seq3	573	phosphomevalonate kinase	-	-	gi|470128515|ref|XP_004300184.1| PREDICTED: phosphomevalonate kinase-like [Fragaria vesca subsp. vesca]	4e-32	B9GZK6_POPTR/373-459 B9GZK6.1 PF08544.8;GHMP_kinases_C;	1e-16	[I] Lipid transport and metabolism	pop:POPTR_739979	3e-30	-	K00938	EC:2.7.4.2	ko00900(Terpenoid backbone biosynthesis)
comp109215_c0_seq2	1883	phosphomevalonate kinase	-	-	gi|470128515|ref|XP_004300184.1| PREDICTED: phosphomevalonate kinase-like [Fragaria vesca subsp. vesca]	0	B9S2I7_RICCO/381-471 B9S2I7.1 PF08544.8;GHMP_kinases_C;	5e-32	[I] Lipid transport and metabolism	vvi:100242124	0	-	K00938	EC:2.7.4.2	ko00900(Terpenoid backbone biosynthesis)
farnesyl diphosphate synthase (FPPS)
comp141123_c0_seq1	249	farnesyl diphosphate synthase	sp|P14324|FPPS_HUMAN Farnesyl pyrophosphate synthase OS=Homo sapiens GN=FDPS PE=1 SV=4	7e-53	gi|382933094|pdb|4DEM|F Chain F, Crystal Structure Of Human Fpps In Complex With Ys_04_70 gi|433286809|pdb|4H5D|F Chain F, Crystal Structure Of Human Fpps In Ternary Complex With Ys0470 And Inorganic Pyrophosphate gi|433286810|pdb|4H5E|F Chain F, Crystal Structure Of Human Fpps In Ternary Complex With Ys0470 And Isopentenyl Pyrophosphate gi|451770445|pdb|4H5C|F Chain F, Crystal Structure Of Human…	3e-42	H2N5H2_PONAB/110-380 H2N5H2.1 PF00348.12;polyprenyl_synt;	2e-32	[H] Coenzyme transport and metabolism	hsa:2224	1e-42	GO:0005829(cytosol);GO:0005634(nucleus);GO:0004161(dimethylallyltranstransferase activity);GO:0004337(geranyltranstransferase activity);GO:0046872(metal ion binding);GO:0006695(cholesterol biosynthetic process);GO:0044419(interspecies interaction between organisms);GO:0008299(isoprenoid biosynthetic process)	K00795	EC:2.5.1.1 2.5.1.10	ko00900(Terpenoid backbone biosynthesis)

## Sheet: Chlorophyll
Sheet 3. All genes identified in chlorophyll breakdown pathway.
Gene	Length	Definition	swiss_prot_des	swiss_prot_evalue	nr_des	nr_evalue	Pfam_des	Pfam_evalue	KOG_des	KEGG_des	KEGG_evalue	GO	KO	EC	Pathway
chlorophyll(ide) b reductase
comp108054_c0_seq2	844	-	sp|Q93ZA0|NYC1_ARATH Probable chlorophyll(ide) b reductase NYC1, chloroplastic OS=Arabidopsis thaliana GN=NYC1 PE=2 SV=1	9e-27	gi|470101903|ref|XP_004287406.1| PREDICTED: probable chlorophyll(ide) b reductase NYC1, chloroplastic-like [Fragaria vesca subsp. vesca]	2e-35	-	-	[R] General function prediction only	-	-	GO:0009535(chloroplast thylakoid membrane);GO:0016021(integral to membrane);GO:0005488(binding);GO:0034256(chlorophyll(ide) b reductase activity);GO:0015996(chlorophyll catabolic process);GO:0010304(PSII associated light-harvesting complex II catabolic process)	-	-	-
comp109663_c0_seq2	2070	-	sp|Q5N800|NYC1_ORYSJ Probable chlorophyll(ide) b reductase NYC1, chloroplastic OS=Oryza sativa subsp. japonica GN=NYC1 PE=1 SV=1	0	gi|470101903|ref|XP_004287406.1| PREDICTED: probable chlorophyll(ide) b reductase NYC1, chloroplastic-like [Fragaria vesca subsp. vesca]	0	B9RKQ4_RICCO/184-371 B9RKQ4.1 PF00106.20;adh_short;	5e-106	[R] General function prediction only	-	-	GO:0009535(chloroplast thylakoid membrane);GO:0016021(integral to membrane);GO:0005488(binding);GO:0034256(chlorophyll(ide) b reductase activity);GO:0015996(chlorophyll catabolic process);GO:0010304(PSII associated light-harvesting complex II catabolic process)	-	-	-
comp110329_c0_seq14	2067	-	sp|Q8LEU3|NOL_ARATH Chlorophyll(ide) b reductase NOL, chloroplastic OS=Arabidopsis thaliana GN=NOL PE=2 SV=1	2e-79	gi|470141423|ref|XP_004306432.1| PREDICTED: chlorophyll(ide) b reductase NOL, chloroplastic-like [Fragaria vesca subsp. vesca]	1e-77	B9HKJ6_POPTR/91-287 B9HKJ6.1 PF00106.20;adh_short;	3e-85	[R] General function prediction only	-	-	GO:0009535(chloroplast thylakoid membrane);GO:0005488(binding);GO:0034256(chlorophyll(ide) b reductase activity);GO:0015996(chlorophyll catabolic process);GO:0010304(PSII associated light-harvesting complex II catabolic process)	-	-	-
comp110329_c0_seq25	1364	-	sp|Q8LEU3|NOL_ARATH Chlorophyll(ide) b reductase NOL, chloroplastic OS=Arabidopsis thaliana GN=NOL PE=2 SV=1	4e-162	gi|470141423|ref|XP_004306432.1| PREDICTED: chlorophyll(ide) b reductase NOL, chloroplastic-like [Fragaria vesca subsp. vesca]	3e-146	D7TA80_VITVI/77-249 D7TA80.1 PF00106.20;adh_short;	2e-103	[R] General function prediction only	-	-	GO:0009535(chloroplast thylakoid membrane);GO:0005488(binding);GO:0034256(chlorophyll(ide) b reductase activity);GO:0015996(chlorophyll catabolic process);GO:0010304(PSII associated light-harvesting complex II catabolic process)	-	-	-
comp110329_c0_seq3	1207	-	sp|Q8LEU3|NOL_ARATH Chlorophyll(ide) b reductase NOL, chloroplastic OS=Arabidopsis thaliana GN=NOL PE=2 SV=1	7e-89	gi|470141423|ref|XP_004306432.1| PREDICTED: chlorophyll(ide) b reductase NOL, chloroplastic-like [Fragaria vesca subsp. vesca]	3e-104	B9HKJ6_POPTR/91-287 B9HKJ6.1 PF00106.20;adh_short;	2e-74	[R] General function prediction only	-	-	GO:0009535(chloroplast thylakoid membrane);GO:0005488(binding);GO:0034256(chlorophyll(ide) b reductase activity);GO:0015996(chlorophyll catabolic process);GO:0010304(PSII associated light-harvesting complex II catabolic process)	-	-	-
comp110329_c0_seq30	1806	-	sp|Q8LEU3|NOL_ARATH Chlorophyll(ide) b reductase NOL, chloroplastic OS=Arabidopsis thaliana GN=NOL PE=2 SV=1	2e-91	gi|470141423|ref|XP_004306432.1| PREDICTED: chlorophyll(ide) b reductase NOL, chloroplastic-like [Fragaria vesca subsp. vesca]	8e-114	D7TA80_VITVI/77-249 D7TA80.1 PF00106.20;adh_short;	3e-92	[R] General function prediction only	-	-	GO:0009535(chloroplast thylakoid membrane);GO:0005488(binding);GO:0034256(chlorophyll(ide) b reductase activity);GO:0015996(chlorophyll catabolic process);GO:0010304(PSII associated light-harvesting complex II catabolic process)	-	-	-
comp110329_c0_seq39	374	-	sp|Q8LEU3|NOL_ARATH Chlorophyll(ide) b reductase NOL, chloroplastic OS=Arabidopsis thaliana GN=NOL PE=2 SV=1	5e-37	gi|470141423|ref|XP_004306432.1| PREDICTED: chlorophyll(ide) b reductase NOL, chloroplastic-like [Fragaria vesca subsp. vesca]	4e-36	B9RL30_RICCO/74-242 B9RL30.1 PF00106.20;adh_short;	1e-42	[R] General function prediction only	-	-	GO:0009535(chloroplast thylakoid membrane);GO:0005488(binding);GO:0034256(chlorophyll(ide) b reductase activity);GO:0015996(chlorophyll catabolic process);GO:0010304(PSII associated light-harvesting complex II catabolic process)	-	-	-
comp110329_c0_seq5	550	-	sp|Q8LEU3|NOL_ARATH Chlorophyll(ide) b reductase NOL, chloroplastic OS=Arabidopsis thaliana GN=NOL PE=2 SV=1	7e-82	gi|470141423|ref|XP_004306432.1| PREDICTED: chlorophyll(ide) b reductase NOL, chloroplastic-like [Fragaria vesca subsp. vesca]	2e-74	D7TA80_VITVI/77-249 D7TA80.1 PF00106.20;adh_short;	3e-89	[R] General function prediction only	-	-	GO:0009535(chloroplast thylakoid membrane);GO:0005488(binding);GO:0034256(chlorophyll(ide) b reductase activity);GO:0015996(chlorophyll catabolic process);GO:0010304(PSII associated light-harvesting complex II catabolic process)	-	-	-
comp111066_c0_seq10	1209	-	sp|Q8LEU3|NOL_ARATH Chlorophyll(ide) b reductase NOL, chloroplastic OS=Arabidopsis thaliana GN=NOL PE=2 SV=1	7e-50	gi|470141423|ref|XP_004306432.1| PREDICTED: chlorophyll(ide) b reductase NOL, chloroplastic-like [Fragaria vesca subsp. vesca]	1e-82	B9RL30_RICCO/74-242 B9RL30.1 PF00106.20;adh_short;	9e-47	[R] General function prediction only	-	-	GO:0009535(chloroplast thylakoid membrane);GO:0005488(binding);GO:0034256(chlorophyll(ide) b reductase activity);GO:0015996(chlorophyll catabolic process);GO:0010304(PSII associated light-harvesting complex II catabolic process)	-	-	-
comp111066_c0_seq11	1138	-	sp|Q8LEU3|NOL_ARATH Chlorophyll(ide) b reductase NOL, chloroplastic OS=Arabidopsis thaliana GN=NOL PE=2 SV=1	7e-101	gi|470141423|ref|XP_004306432.1| PREDICTED: chlorophyll(ide) b reductase NOL, chloroplastic-like [Fragaria vesca subsp. vesca]	2e-143	D7TA80_VITVI/77-249 D7TA80.1 PF00106.20;adh_short;	2e-83	[R] General function prediction only	-	-	GO:0009535(chloroplast thylakoid membrane);GO:0005488(binding);GO:0034256(chlorophyll(ide) b reductase activity);GO:0015996(chlorophyll catabolic process);GO:0010304(PSII associated light-harvesting complex II catabolic process)	-	-	-
comp111066_c0_seq4	1282	-	sp|Q8LEU3|NOL_ARATH Chlorophyll(ide) b reductase NOL, chloroplastic OS=Arabidopsis thaliana GN=NOL PE=2 SV=1	3e-134	gi|470141423|ref|XP_004306432.1| PREDICTED: chlorophyll(ide) b reductase NOL, chloroplastic-like [Fragaria vesca subsp. vesca]	1e-177	D7TA80_VITVI/77-249 D7TA80.1 PF00106.20;adh_short;	8e-84	[R] General function prediction only	-	-	GO:0009535(chloroplast thylakoid membrane);GO:0005488(binding);GO:0034256(chlorophyll(ide) b reductase activity);GO:0015996(chlorophyll catabolic process);GO:0010304(PSII associated light-harvesting complex II catabolic process)	-	-	-
comp111066_c0_seq6	220	-	sp|Q8LEU3|NOL_ARATH Chlorophyll(ide) b reductase NOL, chloroplastic OS=Arabidopsis thaliana GN=NOL PE=2 SV=1	9e-27	gi|470141423|ref|XP_004306432.1| PREDICTED: chlorophyll(ide) b reductase NOL, chloroplastic-like [Fragaria vesca subsp. vesca]	1e-22	D7TA80_VITVI/77-249 D7TA80.1 PF00106.20;adh_short;	4e-29	[R] General function prediction only	-	-	GO:0009535(chloroplast thylakoid membrane);GO:0005488(binding);GO:0034256(chlorophyll(ide) b reductase activity);GO:0015996(chlorophyll catabolic process);GO:0010304(PSII associated light-harvesting complex II catabolic process)	-	-	-
comp111066_c0_seq7	317	-	sp|Q8LEU3|NOL_ARATH Chlorophyll(ide) b reductase NOL, chloroplastic OS=Arabidopsis thaliana GN=NOL PE=2 SV=1	2e-28	gi|470141423|ref|XP_004306432.1| PREDICTED: chlorophyll(ide) b reductase NOL, chloroplastic-like [Fragaria vesca subsp. vesca]	8e-24	-	-	[R] General function prediction only	-	-	GO:0009535(chloroplast thylakoid membrane);GO:0005488(binding);GO:0034256(chlorophyll(ide) b reductase activity);GO:0015996(chlorophyll catabolic process);GO:0010304(PSII associated light-harvesting complex II catabolic process)	-	-	-
comp111066_c0_seq9	455	-	-	-	gi|470141423|ref|XP_004306432.1| PREDICTED: chlorophyll(ide) b reductase NOL, chloroplastic-like [Fragaria vesca subsp. vesca]	1e-29	-	-	-	-	-	-	-	-	-
Chlase
comp101862_c2_seq3	828	-	sp|Q9M7I7|CLH2_ARATH Chlorophyllase-2, chloroplastic OS=Arabidopsis thaliana GN=CLH2 PE=1 SV=1	1e-108	gi|470120996|ref|XP_004296571.1| PREDICTED: chlorophyllase-2, chloroplastic-like [Fragaria vesca subsp. vesca]	1e-129	D7T734_VITVI/14-321 D7T734.1 PF07224.6;Chlorophyllase;	5e-130	-	-	-	GO:0031969(chloroplast membrane);GO:0047746(chlorophyllase activity);GO:0015996(chlorophyll catabolic process)	-	-	-
comp91910_c0_seq1	602	-	-	-	gi|470120996|ref|XP_004296571.1| PREDICTED: chlorophyllase-2, chloroplastic-like [Fragaria vesca subsp. vesca]	1e-107	B9RTK6_RICCO/3-312 B9RTK6.1 PF07224.6;Chlorophyllase;	4e-71	-	-	-	-	-	-	-
comp92999_c0_seq2	1148	-	sp|O22527|CLH1_ARATH Chlorophyllase-1 OS=Arabidopsis thaliana GN=CLH1 PE=1 SV=1	8e-116	gi|470108660|ref|XP_004290630.1| PREDICTED: chlorophyllase-1-like [Fragaria vesca subsp. vesca]	0	G3K720_9ROSA/2-301 G3K720.1 PF07224.6;Chlorophyllase;	4e-178	-	-	-	GO:0005773(vacuole);GO:0047746(chlorophyllase activity);GO:0015996(chlorophyll catabolic process);GO:0006950(response to stress)	-	-	-
comp92999_c0_seq3	595	-	sp|O22527|CLH1_ARATH Chlorophyllase-1 OS=Arabidopsis thaliana GN=CLH1 PE=1 SV=1	1e-23	gi|470108660|ref|XP_004290630.1| PREDICTED: chlorophyllase-1-like [Fragaria vesca subsp. vesca]	2e-56	G3K720_9ROSA/2-301 G3K720.1 PF07224.6;Chlorophyllase;	5e-37	-	-	-	GO:0005773(vacuole);GO:0047746(chlorophyllase activity);GO:0015996(chlorophyll catabolic process);GO:0006950(response to stress)	-	-	-
pheophorbide a oxygenase (PAO)
comp103715_c1_seq2	2098	-	sp|Q9FYC2|PAO_ARATH Pheophorbide a oxygenase, chloroplastic OS=Arabidopsis thaliana GN=PAO PE=1 SV=1	0	gi|470116673|ref|XP_004294502.1| PREDICTED: pheophorbide a oxygenase, chloroplastic-like [Fragaria vesca subsp. vesca]	0	C1K6H0_VITVI/300-401 C1K6H0.1 PF08417.7;PaO;	3e-65	-	-	-	GO:0009706(chloroplast inner membrane);GO:0051537(2 iron, 2 sulfur cluster binding);GO:0010277(chlorophyllide a oxygenase [overall] activity);GO:0046872(metal ion binding);GO:0032441(pheophorbide a oxygenase activity);GO:0008219(cell death);GO:0015996(chlorophyll catabolic process);GO:0009816(defense response to bacterium, incompatible interaction);GO:0009908(flower development);GO:0010154(fruit …	-	-	-
comp106745_c0_seq2	2312	-	sp|Q9FYC2|PAO_ARATH Pheophorbide a oxygenase, chloroplastic OS=Arabidopsis thaliana GN=PAO PE=1 SV=1	0	gi|470116673|ref|XP_004294502.1| PREDICTED: pheophorbide a oxygenase, chloroplastic-like [Fragaria vesca subsp. vesca]	0	C1K6H0_VITVI/300-401 C1K6H0.1 PF08417.7;PaO;	1e-64	-	-	-	GO:0009706(chloroplast inner membrane);GO:0051537(2 iron, 2 sulfur cluster binding);GO:0010277(chlorophyllide a oxygenase [overall] activity);GO:0046872(metal ion binding);GO:0032441(pheophorbide a oxygenase activity);GO:0008219(cell death);GO:0015996(chlorophyll catabolic process);GO:0009816(defense response to bacterium, incompatible interaction);GO:0009908(flower development);GO:0010154(fruit …	-	-	-
red chlorophyll catabolite reductase (RCCR)
comp109834_c0_seq3	1645	-	sp|Q8LDU4|RCCR_ARATH Red chlorophyll catabolite reductase, chloroplastic OS=Arabidopsis thaliana GN=RCCR PE=1 SV=2	1e-101	gi|470142660|ref|XP_004307021.1| PREDICTED: red chlorophyll catabolite reductase, chloroplastic-like [Fragaria vesca subsp. vesca]	3e-156	D7SVY1_VITVI/67-321 D7SVY1.1 PF06405.6;RCC_reductase;	8e-126	-	-	-	GO:0009941(chloroplast envelope);GO:0009570(chloroplast stroma);GO:0005829(cytosol);GO:0005739(mitochondrion);GO:0051743(red chlorophyll catabolite reductase activity);GO:0015996(chlorophyll catabolic process);GO:0009814(defense response, incompatible interaction);GO:0010363(regulation of plant-type hypersensitive response)	-	-	-

## Sheet: Ascorbic acid
Sheet 4. All genes identified in ascorbic acid biosynthetic pathway.
Gene	Length	Definition	swiss_prot_des	swiss_prot_evalue	nr_des	nr_evalue	Pfam_des	Pfam_evalue	KOG_des	KEGG_des	KEGG_evalue	GO	KO	EC	Pathway
Glucose-6-phosphate isomerase (GPI)
comp106510_c0_seq12	2144	glucose-6-phosphate isomerase	sp|O82059|G6PI_SPIOL Glucose-6-phosphate isomerase, cytosolic OS=Spinacia oleracea GN=PGIC PE=2 SV=2	0	gi|470111294|ref|XP_004291883.1| PREDICTED: glucose-6-phosphate isomerase, cytosolic-like [Fragaria vesca subsp. vesca]	0	G6PI_SPIOL/51-547 O82059.2 PF00342.14;PGI;	0	[G] Carbohydrate transport and metabolism	vvi:100252335	0	GO:0005737(cytoplasm);GO:0004347(glucose-6-phosphate isomerase activity);GO:0006094(gluconeogenesis);GO:0006096(glycolysis)	K01810	EC:5.3.1.9	ko00010(Glycolysis / Gluconeogenesis);ko00030(Pentose phosphate pathway);ko00500(Starch and sucrose metabolism);ko00520(Amino sugar and nucleotide sugar metabolism)
comp106510_c0_seq3	523	glucose-6-phosphate isomerase	sp|P42862|G6PIA_ORYSJ Glucose-6-phosphate isomerase, cytosolic A OS=Oryza sativa subsp. japonica GN=Os03g0776000 PE=2 SV=2	2e-21	gi|45581337|emb|CAD79574.1| cytosolic phosphoglucose isomerase [Fuchsia cylindracea]	3e-25	F8U878_AMOKO/1-189 F8U878.1 PF00342.14;PGI;	5e-25	[G] Carbohydrate transport and metabolism	ath:AT5G42740	1e-23	GO:0005829(cytosol);GO:0004347(glucose-6-phosphate isomerase activity);GO:0006094(gluconeogenesis);GO:0006096(glycolysis)	K01810	EC:5.3.1.9	ko00010(Glycolysis / Gluconeogenesis);ko00030(Pentose phosphate pathway);ko00500(Starch and sucrose metabolism);ko00520(Amino sugar and nucleotide sugar metabolism)
comp117155_c0_seq1	597	glucose-6-phosphate isomerase	sp|Q8H103|G6PIP_ARATH Glucose-6-phosphate isomerase 1, chloroplastic OS=Arabidopsis thaliana GN=PGI1 PE=1 SV=1	3e-59	gi|470127512|ref|XP_004299713.1| PREDICTED: glucose-6-phosphate isomerase 1, chloroplastic-like [Fragaria vesca subsp. vesca]	3e-67	I1K9N4_SOYBN/95-457 I1K9N4.1 PF00342.14;PGI;	1e-66	[G] Carbohydrate transport and metabolism	pop:POPTR_1071816	5e-54	-	K01810	EC:5.3.1.9	ko00010(Glycolysis / Gluconeogenesis);ko00030(Pentose phosphate pathway);ko00500(Starch and sucrose metabolism);ko00520(Amino sugar and nucleotide sugar metabolism)
comp117420_c0_seq3	2533	glucose-6-phosphate isomerase	sp|Q8H103|G6PIP_ARATH Glucose-6-phosphate isomerase 1, chloroplastic OS=Arabidopsis thaliana GN=PGI1 PE=1 SV=1	0	gi|470127512|ref|XP_004299713.1| PREDICTED: glucose-6-phosphate isomerase 1, chloroplastic-like [Fragaria vesca subsp. vesca]	0	E4MWY6_THEHA/93-545 E4MWY6.1 PF00342.14;PGI;	0	[G] Carbohydrate transport and metabolism	vvi:100262681	0	-	K01810	EC:5.3.1.9	ko00010(Glycolysis / Gluconeogenesis);ko00030(Pentose phosphate pathway);ko00500(Starch and sucrose metabolism);ko00520(Amino sugar and nucleotide sugar metabolism)
comp117420_c0_seq4	835	glucose-6-phosphate isomerase	sp|Q8H103|G6PIP_ARATH Glucose-6-phosphate isomerase 1, chloroplastic OS=Arabidopsis thaliana GN=PGI1 PE=1 SV=1	1e-46	gi|470127512|ref|XP_004299713.1| PREDICTED: glucose-6-phosphate isomerase 1, chloroplastic-like [Fragaria vesca subsp. vesca]	2e-53	-	-	[G] Carbohydrate transport and metabolism	pop:POPTR_1071816	6e-42	-	K01810	EC:5.3.1.9	ko00010(Glycolysis / Gluconeogenesis);ko00030(Pentose phosphate pathway);ko00500(Starch and sucrose metabolism);ko00520(Amino sugar and nucleotide sugar metabolism)
Mannose-6-phosphate isomerase (MPI)
comp107047_c0_seq1	2085	-	sp|Q9M884|MPI1_ARATH Mannose-6-phosphate isomerase 1 OS=Arabidopsis thaliana GN=PMI1 PE=1 SV=1	5e-71	gi|470126144|ref|XP_004299053.1| PREDICTED: glutamine--tRNA ligase-like [Fragaria vesca subsp. vesca]	2e-151	B9SLX4_RICCO/29-400 B9SLX4.1 PF01238.16;PMI_typeI;	6e-91	[G] Carbohydrate transport and metabolism	-	-	-	-	-	-
comp107047_c0_seq13	2042	mannose-6-phosphate isomerase	sp|Q9M884|MPI1_ARATH Mannose-6-phosphate isomerase 1 OS=Arabidopsis thaliana GN=PMI1 PE=1 SV=1	4e-79	gi|462419221|gb|EMJ23484.1| hypothetical protein PRUPE_ppa005896mg [Prunus persica]	8e-143	F6HSR9_VITVI/12-382 F6HSR9.1 PF01238.16;PMI_typeI;	6e-94	[G] Carbohydrate transport and metabolism	vvi:100263511	4e-99	-	K01809	EC:5.3.1.8	ko00051(Fructose and mannose metabolism);ko00520(Amino sugar and nucleotide sugar metabolism)
comp107047_c0_seq14	1845	mannose-6-phosphate isomerase	sp|Q9M884|MPI1_ARATH Mannose-6-phosphate isomerase 1 OS=Arabidopsis thaliana GN=PMI1 PE=1 SV=1	9e-58	gi|462419221|gb|EMJ23484.1| hypothetical protein PRUPE_ppa005896mg [Prunus persica]	3e-96	I1N5B5_SOYBN/6-378 I1N5B5.1 PF01238.16;PMI_typeI;	3e-66	[G] Carbohydrate transport and metabolism	pop:POPTR_758948	7e-71	-	K01809	EC:5.3.1.8	ko00051(Fructose and mannose metabolism);ko00520(Amino sugar and nucleotide sugar metabolism)
comp107047_c0_seq5	2422	mannose-6-phosphate isomerase	sp|Q9M884|MPI1_ARATH Mannose-6-phosphate isomerase 1 OS=Arabidopsis thaliana GN=PMI1 PE=1 SV=1	2e-68	gi|462419221|gb|EMJ23484.1| hypothetical protein PRUPE_ppa005896mg [Prunus persica]	6e-114	F6HSR9_VITVI/12-382 F6HSR9.1 PF01238.16;PMI_typeI;	2e-74	[G] Carbohydrate transport and metabolism	vvi:100263511	2e-79	-	K01809	EC:5.3.1.8	ko00051(Fructose and mannose metabolism);ko00520(Amino sugar and nucleotide sugar metabolism)
comp107047_c0_seq9	1731	mannose-6-phosphate isomerase	sp|Q9M884|MPI1_ARATH Mannose-6-phosphate isomerase 1 OS=Arabidopsis thaliana GN=PMI1 PE=1 SV=1	2e-130	gi|462419221|gb|EMJ23484.1| hypothetical protein PRUPE_ppa005896mg [Prunus persica]	0	B9SLX4_RICCO/29-400 B9SLX4.1 PF01238.16;PMI_typeI;	2e-136	[G] Carbohydrate transport and metabolism	vvi:100263511	1e-137	-	K01809	EC:5.3.1.8	ko00051(Fructose and mannose metabolism);ko00520(Amino sugar and nucleotide sugar metabolism)
comp93780_c0_seq2	653	mannose-6-phosphate isomerase	sp|Q9FZH5|MPI2_ARATH Mannose-6-phosphate isomerase 2 OS=Arabidopsis thaliana GN=PMI2 PE=1 SV=1	3e-41	gi|470128719|ref|XP_004300283.1| PREDICTED: mannose-6-phosphate isomerase 2-like [Fragaria vesca subsp. vesca]	9e-82	F6HSR9_VITVI/12-382 F6HSR9.1 PF01238.16;PMI_typeI;	7e-47	[G] Carbohydrate transport and metabolism	vvi:100263511	3e-48	-	K01809	EC:5.3.1.8	ko00051(Fructose and mannose metabolism);ko00520(Amino sugar and nucleotide sugar metabolism)
comp97873_c0_seq1	1126	mannose-6-phosphate isomerase	sp|Q9FZH5|MPI2_ARATH Mannose-6-phosphate isomerase 2 OS=Arabidopsis thaliana GN=PMI2 PE=1 SV=1	5e-136	gi|470128719|ref|XP_004300283.1| PREDICTED: mannose-6-phosphate isomerase 2-like [Fragaria vesca subsp. vesca]	0	F6HSR9_VITVI/12-382 F6HSR9.1 PF01238.16;PMI_typeI;	9e-142	[G] Carbohydrate transport and metabolism	vvi:100263511	2e-153	-	K01809	EC:5.3.1.8	ko00051(Fructose and mannose metabolism);ko00520(Amino sugar and nucleotide sugar metabolism)
Phosphomannomutase (PMM)
comp102125_c0_seq3	1218	-	sp|Q1W374|PMM_WHEAT Phosphomannomutase OS=Triticum aestivum PE=2 SV=1	2e-158	gi|470142225|ref|XP_004306812.1| PREDICTED: phosphomannomutase-like [Fragaria vesca subsp. vesca]	1e-141	C8CK15_AEGTA/34-251 C8CK15.1 PF03332.8;PMM;	6e-143	[I] Lipid transport and metabolism	-	-	GO:0005737(cytoplasm);GO:0004615(phosphomannomutase activity);GO:0019307(mannose biosynthetic process)	-	-	-
comp118301_c0_seq5	2267	-	-	-	gi|470143445|ref|XP_004307387.1| PREDICTED: phosphomannomutase/phosphoglucomutase-like [Fragaria vesca subsp. vesca]	0	B9T3D2_RICCO/89-242 B9T3D2.1 PF02878.11;PGM_PMM_I;	1e-84	[G] Carbohydrate transport and metabolism	-	-	-	-	-	-
comp118301_c0_seq6	1437	-	-	-	gi|470143445|ref|XP_004307387.1| PREDICTED: phosphomannomutase/phosphoglucomutase-like [Fragaria vesca subsp. vesca]	0	Q9LF71_ARATH/332-455 Q9LF71.1 PF02880.11;PGM_PMM_III;	7e-67	[G] Carbohydrate transport and metabolism	-	-	-	-	-	-
comp84471_c0_seq1	315	-	-	-	gi|470143445|ref|XP_004307387.1| PREDICTED: phosphomannomutase/phosphoglucomutase-like [Fragaria vesca subsp. vesca]	5e-44	-	-	-	-	-	-	-	-	-
Mannose-1-phosphate guanyltransferase (GMPPB)
comp105540_c0_seq1	1676	-	sp|Q86HG0|GMPPA_DICDI Mannose-1-phosphate guanyltransferase alpha OS=Dictyostelium discoideum GN=gmppA PE=2 SV=1	3e-99	gi|470127258|ref|XP_004299591.1| PREDICTED: mannose-1-phosphate guanyltransferase alpha-like [Fragaria vesca subsp. vesca]	0	A6MUT4_GOSHI/9-265 A6MUT4.1 PF00483.18;NTP_transferase;	2e-167	[G] Carbohydrate transport and metabolism ;[M] Cell wall/membrane/envelope biogenesis ;[O] Posttranslational modification, protein turnover, chaperones	-	-	GO:0005525(GTP binding);GO:0004475(mannose-1-phosphate guanylyltransferase activity);GO:0009298(GDP-mannose biosynthetic process)	-	-	-
comp105540_c0_seq2	994	-	sp|Q7SXP8|GMPAB_DANRE Mannose-1-phosphate guanyltransferase alpha-B OS=Danio rerio GN=gmppab PE=2 SV=1	3e-39	gi|470127258|ref|XP_004299591.1| PREDICTED: mannose-1-phosphate guanyltransferase alpha-like [Fragaria vesca subsp. vesca]	3e-96	Q1HGA9_LINUS/294-334 Q1HGA9.1 PF00132.19;Hexapep;	9e-17	[G] Carbohydrate transport and metabolism ;[M] Cell wall/membrane/envelope biogenesis ;[O] Posttranslational modification, protein turnover, chaperones	-	-	GO:0005525(GTP binding);GO:0004475(mannose-1-phosphate guanylyltransferase activity);GO:0009058(biosynthetic process)	-	-	-
comp109042_c0_seq11	3319	-	sp|Q86HG0|GMPPA_DICDI Mannose-1-phosphate guanyltransferase alpha OS=Dictyostelium discoideum GN=gmppA PE=2 SV=1	2e-99	gi|470120963|ref|XP_004296555.1| PREDICTED: mannose-1-phosphate guanyltransferase alpha-like [Fragaria vesca subsp. vesca]	0	I1N6T7_SOYBN/8-262 I1N6T7.1 PF00483.18;NTP_transferase;	3e-157	[G] Carbohydrate transport and metabolism ;[M] Cell wall/membrane/envelope biogenesis ;[O] Posttranslational modification, protein turnover, chaperones	-	-	GO:0005525(GTP binding);GO:0004475(mannose-1-phosphate guanylyltransferase activity);GO:0009298(GDP-mannose biosynthetic process)	-	-	-
comp109042_c0_seq4	3724	-	sp|Q86HG0|GMPPA_DICDI Mannose-1-phosphate guanyltransferase alpha OS=Dictyostelium discoideum GN=gmppA PE=2 SV=1	2e-99	gi|470120963|ref|XP_004296555.1| PREDICTED: mannose-1-phosphate guanyltransferase alpha-like [Fragaria vesca subsp. vesca]	0	I1N6T7_SOYBN/8-262 I1N6T7.1 PF00483.18;NTP_transferase;	1e-155	[G] Carbohydrate transport and metabolism ;[M] Cell wall/membrane/envelope biogenesis ;[O] Posttranslational modification, protein turnover, chaperones	-	-	GO:0005525(GTP binding);GO:0004475(mannose-1-phosphate guanylyltransferase activity);GO:0009298(GDP-mannose biosynthetic process)	-	-	-
GDP-mannose 3,5-epimerase (GME)
comp105706_c0_seq1	1724	-	sp|A2Z7B3|GME1_ORYSI GDP-mannose 3,5-epimerase 1 OS=Oryza sativa subsp. indica GN=OsI_032456 PE=2 SV=1	0	gi|470132358|ref|XP_004302049.1| PREDICTED: GDP-mannose 3,5-epimerase 1-like [Fragaria vesca subsp. vesca]	0	I1R1A8_ORYGL/25-264 I1R1A8.1 PF01370.16;Epimerase;	5e-171	[G] Carbohydrate transport and metabolism ;[M] Cell wall/membrane/envelope biogenesis	-	-	GO:0050662(coenzyme binding);GO:0047918(GDP-mannose 3,5-epimerase activity);GO:0019853(L-ascorbic acid biosynthetic process)	-	-	-
GDP-L-galactose phosphorylase (GGP)
comp118304_c0_seq1	2376	-	sp|Q8RWE8|GGAP1_ARATH GDP-L-galactose phosphorylase 1 OS=Arabidopsis thaliana GN=VTC2 PE=1 SV=1	0	gi|470116462|ref|XP_004294401.1| PREDICTED: GDP-L-galactose phosphorylase 1-like [Fragaria vesca subsp. vesca]	0	-	-	[R] General function prediction only	-	-	GO:0005737(cytoplasm);GO:0005634(nucleus);GO:0010475(galactose-1-phosphate guanylyltransferase (GDP) activity);GO:0080048(GDP-D-glucose phosphorylase activity);GO:0010472(GDP-galactose:glucose-1-phosphate guanylyltransferase activity);GO:0010471(GDP-galactose:mannose-1-phosphate guanylyltransferase activity);GO:0010473(GDP-galactose:myoinositol-1-phosphate guanylyltransferase activity);GO:0010474…	-	-	-
comp107079_c0_seq10	1070	-	-	-	gi|470115597|ref|XP_004293983.1| PREDICTED: GDP-L-galactose phosphorylase 1-like [Fragaria vesca subsp. vesca]	3e-79	-	-	-	-	-	-	-	-	-
comp107079_c0_seq8	1841	-	-	-	gi|470115597|ref|XP_004293983.1| PREDICTED: GDP-L-galactose phosphorylase 1-like [Fragaria vesca subsp. vesca]	0	-	-	-	-	-	-	-	-	-
L-galactose dehydrogenase (GDH)
comp104149_c0_seq2	1483	-	sp|O81884|GALDH_ARATH L-galactose dehydrogenase OS=Arabidopsis thaliana GN=LGALDH PE=1 SV=1	1e-148	gi|470106975|ref|XP_004289827.1| PREDICTED: L-galactose dehydrogenase-like [Fragaria vesca subsp. vesca]	0	C5MQG6_MALDO/23-310 C5MQG6.1 PF00248.16;Aldo_ket_red;	0	[C] Energy production and conversion	-	-	-	-	-	-
L-galactono-1,4-lactone dehydrogenase (GLDH)
comp112527_c0_seq3	2296	-	sp|O47881|GLDH_BRAOL L-galactono-1,4-lactone dehydrogenase, mitochondrial OS=Brassica oleracea PE=1 SV=1	0	gi|470135616|ref|XP_004303609.1| PREDICTED: L-galactono-1,4-lactone dehydrogenase, mitochondrial-like [Fragaria vesca subsp. vesca]	0	Q6DUK5_9ROSA/268-582 Q6DUK5.1 PF04030.9;ALO;	0	[V] Defense mechanisms	-	-	GO:0016021(integral to membrane);GO:0031966(mitochondrial membrane);GO:0003885(D-arabinono-1,4-lactone oxidase activity);GO:0050660(flavin adenine dinucleotide binding);GO:0016633(galactonolactone dehydrogenase activity);GO:0008762(UDP-N-acetylmuramate dehydrogenase activity)	-	-	-
Sugar phosphatase
comp114513_c1_seq1	2262	-	-	-	gi|470125611|ref|XP_004298795.1| PREDICTED: sugar phosphatase YfbT-like [Fragaria vesca subsp. vesca]	0	B9RCB5_RICCO/135-316 B9RCB5.1 PF13419.1;HAD_2;	6e-112	[R] General function prediction only	-	-	-	-	-	-

## Sheet: Folate
Sheet 5. All genes identified in folate biosynthetic pathway.
Gene	Length	Definition	swiss_prot_des	swiss_prot_evalue	nr_des	nr_evalue	Pfam_des	Pfam_evalue	KOG_des	KEGG_des	KEGG_evalue	GO	KO	EC	Pathway
GTP cyclohydrolase
comp116715_c0_seq1	2352	-	sp|O61573|GCH1_OSTOS GTP cyclohydrolase 1 OS=Ostertagia ostertagi GN=gch PE=2 SV=1	7e-31	gi|470107680|ref|XP_004290171.1| PREDICTED: uncharacterized protein LOC101307844 [Fragaria vesca subsp. vesca]	0	G7L058_MEDTR/26-221 G7L058.1 PF01227.17;GTP_cyclohydroI;	1e-103	[H] Coenzyme transport and metabolism	-	-	GO:0005737(cytoplasm);GO:0005525(GTP binding);GO:0003934(GTP cyclohydrolase I activity);GO:0046872(metal ion binding);GO:0006729(tetrahydrobiopterin biosynthetic process);GO:0046654(tetrahydrofolate biosynthetic process)	-	-	-
DHN triphosphate diphosphatase
comp114039_c2_seq1	742	-	sp|Q9CA40|NUDT1_ARATH Nudix hydrolase 1 OS=Arabidopsis thaliana GN=NUDT1 PE=1 SV=1	7e-69	gi|470122248|ref|XP_004297157.1| PREDICTED: nudix hydrolase 1-like [Fragaria vesca subsp. vesca]	2e-108	B9SEG4_RICCO/15-140 B9SEG4.1 PF00293.23;NUDIX;	4e-72	-	-	-	GO:0005829(cytosol);GO:0008413(8-oxo-7,8-dihydroguanosine triphosphate pyrophosphatase activity);GO:0019177(dihydroneopterin triphosphate pyrophosphohydrolase activity);GO:0046872(metal ion binding);GO:0000210(NAD+ diphosphatase activity);GO:0006974(response to DNA damage stimulus)	-	-	-
comp85937_c0_seq1	856	-	sp|Q9CA40|NUDT1_ARATH Nudix hydrolase 1 OS=Arabidopsis thaliana GN=NUDT1 PE=1 SV=1	8e-47	gi|470137159|ref|XP_004304338.1| PREDICTED: nudix hydrolase 1-like [Fragaria vesca subsp. vesca]	2e-62	B9HIX1_POPTR/88-215 B9HIX1.1 PF00293.23;NUDIX;	2e-47	-	-	-	GO:0005829(cytosol);GO:0008413(8-oxo-7,8-dihydroguanosine triphosphate pyrophosphatase activity);GO:0019177(dihydroneopterin triphosphate pyrophosphohydrolase activity);GO:0046872(metal ion binding);GO:0000210(NAD+ diphosphatase activity);GO:0006974(response to DNA damage stimulus)	-	-	-
dihydroneopterin aldolase
comp100167_c1_seq3	1187	dihydroneopterin aldolase	sp|Q9SF23|FOLB1_ARATH Dihydroneopterin aldolase OS=Arabidopsis thaliana GN=FOLB1 PE=1 SV=1	4e-47	gi|470135234|ref|XP_004303428.1| PREDICTED: dihydroneopterin aldolase-like isoform 1 [Fragaria vesca subsp. vesca] gi|470135236|ref|XP_004303429.1| PREDICTED: dihydroneopterin aldolase-like isoform 2 [Fragaria vesca subsp. vesca]	1e-71	B9III2_POPTR/12-125 B9III2.1 PF02152.13;FolB;	6e-63	-	pop:POPTR_825166	6e-72	GO:0005829(cytosol);GO:0004150(dihydroneopterin aldolase activity);GO:0046656(folic acid biosynthetic process)	K01633	EC:4.1.2.25	ko00790(Folate biosynthesis)
comp100167_c1_seq4	975	dihydroneopterin aldolase	sp|Q9SF23|FOLB1_ARATH Dihydroneopterin aldolase OS=Arabidopsis thaliana GN=FOLB1 PE=1 SV=1	8e-49	gi|470135234|ref|XP_004303428.1| PREDICTED: dihydroneopterin aldolase-like isoform 1 [Fragaria vesca subsp. vesca] gi|470135236|ref|XP_004303429.1| PREDICTED: dihydroneopterin aldolase-like isoform 2 [Fragaria vesca subsp. vesca]	6e-73	B9III2_POPTR/12-125 B9III2.1 PF02152.13;FolB;	2e-65	-	pop:POPTR_825166	2e-74	GO:0005829(cytosol);GO:0004150(dihydroneopterin aldolase activity);GO:0046656(folic acid biosynthetic process)	K01633	EC:4.1.2.25	ko00790(Folate biosynthesis)
dihydrofolate reductase
comp101395_c0_seq6	350	-	-	-	gi|470101485|ref|XP_004287203.1| PREDICTED: dihydrofolate reductase-like [Fragaria vesca subsp. vesca]	1e-31	I1JK30_SOYBN/2-139 I1JK30.1 PF03959.8;FSH1;	7e-31	-	-	-	-	-	-	-
comp113396_c0_seq11	1303	-	sp|P51820|DRTS_SOYBN Bifunctional dihydrofolate reductase-thymidylate synthase OS=Glycine max PE=1 SV=1	2e-129	gi|470106555|ref|XP_004289633.1| PREDICTED: bifunctional dihydrofolate reductase-thymidylate synthase-like [Fragaria vesca subsp. vesca]	5e-144	B9H0T4_POPTR/24-201 B9H0T4.1 PF00186.14;DHFR_1;	2e-103	[H] Coenzyme transport and metabolism	-	-	GO:0004146(dihydrofolate reductase activity);GO:0004799(thymidylate synthase activity);GO:0006231(dTMP biosynthetic process);GO:0006545(glycine biosynthetic process)	-	-	-
comp113396_c0_seq15	1231	thymidylate synthase	sp|Q05762|DRTS1_ARATH Bifunctional dihydrofolate reductase-thymidylate synthase 1 OS=Arabidopsis thaliana GN=THY-1 PE=2 SV=2	1e-148	gi|470106555|ref|XP_004289633.1| PREDICTED: bifunctional dihydrofolate reductase-thymidylate synthase-like [Fragaria vesca subsp. vesca]	1e-127	B9H0T4_POPTR/245-528 B9H0T4.1 PF00303.14;Thymidylat_synt;	2e-151	[F] Nucleotide transport and metabolism	ath:AT2G16370	9e-121	GO:0005829(cytosol);GO:0004146(dihydrofolate reductase activity);GO:0004799(thymidylate synthase activity);GO:0006231(dTMP biosynthetic process);GO:0006545(glycine biosynthetic process)	K00560	EC:2.1.1.45	ko00240(Pyrimidine metabolism);ko00670(One carbon pool by folate)
comp113396_c0_seq9	564	-	sp|P45350|DRTS_DAUCA Bifunctional dihydrofolate reductase-thymidylate synthase OS=Daucus carota PE=2 SV=1	2e-39	gi|470106555|ref|XP_004289633.1| PREDICTED: bifunctional dihydrofolate reductase-thymidylate synthase-like [Fragaria vesca subsp. vesca]	1e-43	B9RH79_RICCO/24-201 B9RH79.1 PF00186.14;DHFR_1;	8e-41	[H] Coenzyme transport and metabolism	-	-	GO:0004146(dihydrofolate reductase activity);GO:0004799(thymidylate synthase activity);GO:0006231(dTMP biosynthetic process);GO:0006545(glycine biosynthetic process)	-	-	-
comp114621_c0_seq28	1070	-	sp|P45350|DRTS_DAUCA Bifunctional dihydrofolate reductase-thymidylate synthase OS=Daucus carota PE=2 SV=1	4e-141	gi|470106555|ref|XP_004289633.1| PREDICTED: bifunctional dihydrofolate reductase-thymidylate synthase-like [Fragaria vesca subsp. vesca]	0	B9H0T4_POPTR/24-201 B9H0T4.1 PF00186.14;DHFR_1;	4e-105	[H] Coenzyme transport and metabolism	-	-	GO:0004146(dihydrofolate reductase activity);GO:0004799(thymidylate synthase activity);GO:0006231(dTMP biosynthetic process);GO:0006545(glycine biosynthetic process)	-	-	-
comp114621_c0_seq30	2706	-	sp|P51820|DRTS_SOYBN Bifunctional dihydrofolate reductase-thymidylate synthase OS=Glycine max PE=1 SV=1	0	gi|470106555|ref|XP_004289633.1| PREDICTED: bifunctional dihydrofolate reductase-thymidylate synthase-like [Fragaria vesca subsp. vesca]	0	B9H0T4_POPTR/245-528 B9H0T4.1 PF00303.14;Thymidylat_synt;	4e-176	[F] Nucleotide transport and metabolism	-	-	GO:0004146(dihydrofolate reductase activity);GO:0004799(thymidylate synthase activity);GO:0006231(dTMP biosynthetic process);GO:0006545(glycine biosynthetic process)	-	-	-
comp114621_c0_seq7	2821	-	sp|Q2QRX6|DRTS_ORYSJ Putative bifunctional dihydrofolate reductase-thymidylate synthase OS=Oryza sativa subsp. japonica GN=Os12g0446900 PE=3 SV=2	0	gi|356508312|ref|XP_003522902.1| PREDICTED: bifunctional dihydrofolate reductase-thymidylate synthase-like [Glycine max]	0	B9H0T4_POPTR/245-528 B9H0T4.1 PF00303.14;Thymidylat_synt;	3e-154	[F] Nucleotide transport and metabolism	-	-	GO:0004146(dihydrofolate reductase activity);GO:0004799(thymidylate synthase activity);GO:0006231(dTMP biosynthetic process);GO:0006545(glycine biosynthetic process)	-	-	-
Para-aminobenzoate synthase (pABS)
comp100145_c2_seq1	1110	-	sp|P32483|PABS_STRGR Para-aminobenzoate synthase OS=Streptomyces griseus GN=pab PE=3 SV=1	1e-37	gi|470146364|ref|XP_004308796.1| PREDICTED: para-aminobenzoate synthase-like [Fragaria vesca subsp. vesca]	2e-133	F6HNH4_VITVI/28-201 F6HNH4.1 PF00117.23;GATase;	2e-90	[J] Translation, ribosomal structure and biogenesis	-	-	GO:0046820(4-amino-4-deoxychorismate synthase activity);GO:0004049(anthranilate synthase activity);GO:0017000(antibiotic biosynthetic process);GO:0046656(folic acid biosynthetic process);GO:0006541(glutamine metabolic process)	-	-	-
comp100145_c2_seq2	918	-	sp|P32483|PABS_STRGR Para-aminobenzoate synthase OS=Streptomyces griseus GN=pab PE=3 SV=1	2e-38	gi|470146364|ref|XP_004308796.1| PREDICTED: para-aminobenzoate synthase-like [Fragaria vesca subsp. vesca]	7e-129	F6HNH4_VITVI/28-201 F6HNH4.1 PF00117.23;GATase;	2e-91	[J] Translation, ribosomal structure and biogenesis	-	-	GO:0046820(4-amino-4-deoxychorismate synthase activity);GO:0004049(anthranilate synthase activity);GO:0017000(antibiotic biosynthetic process);GO:0046656(folic acid biosynthetic process);GO:0006541(glutamine metabolic process)	-	-	-
comp112714_c0_seq1	2443	-	sp|P32483|PABS_STRGR Para-aminobenzoate synthase OS=Streptomyces griseus GN=pab PE=3 SV=1	6e-65	gi|470146364|ref|XP_004308796.1| PREDICTED: para-aminobenzoate synthase-like [Fragaria vesca subsp. vesca]	0	B9HUE3_POPTR/658-916 B9HUE3.1 PF00425.13;Chorismate_bind;	3e-145	[J] Translation, ribosomal structure and biogenesis	-	-	GO:0046820(4-amino-4-deoxychorismate synthase activity);GO:0004049(anthranilate synthase activity);GO:0017000(antibiotic biosynthetic process);GO:0046656(folic acid biosynthetic process);GO:0006541(glutamine metabolic process)	-	-	-
comp112714_c0_seq10	2367	-	sp|P32483|PABS_STRGR Para-aminobenzoate synthase OS=Streptomyces griseus GN=pab PE=3 SV=1	4e-65	gi|470146364|ref|XP_004308796.1| PREDICTED: para-aminobenzoate synthase-like [Fragaria vesca subsp. vesca]	0	B9HUE3_POPTR/658-916 B9HUE3.1 PF00425.13;Chorismate_bind;	2e-145	[J] Translation, ribosomal structure and biogenesis	-	-	GO:0046820(4-amino-4-deoxychorismate synthase activity);GO:0004049(anthranilate synthase activity);GO:0017000(antibiotic biosynthetic process);GO:0046656(folic acid biosynthetic process);GO:0006541(glutamine metabolic process)	-	-	-
comp112714_c0_seq12	2482	-	sp|P32483|PABS_STRGR Para-aminobenzoate synthase OS=Streptomyces griseus GN=pab PE=3 SV=1	7e-65	gi|470146364|ref|XP_004308796.1| PREDICTED: para-aminobenzoate synthase-like [Fragaria vesca subsp. vesca]	0	B9HUE3_POPTR/658-916 B9HUE3.1 PF00425.13;Chorismate_bind;	5e-145	[J] Translation, ribosomal structure and biogenesis	-	-	GO:0046820(4-amino-4-deoxychorismate synthase activity);GO:0004049(anthranilate synthase activity);GO:0017000(antibiotic biosynthetic process);GO:0046656(folic acid biosynthetic process);GO:0006541(glutamine metabolic process)	-	-	-
comp112714_c0_seq15	1232	-	-	-	gi|470146364|ref|XP_004308796.1| PREDICTED: para-aminobenzoate synthase-like [Fragaria vesca subsp. vesca]	1e-179	B9SUA1_RICCO/435-590 B9SUA1.1 PF04715.8;Anth_synt_I_N;	1e-55	[J] Translation, ribosomal structure and biogenesis	-	-	-	-	-	-
comp112714_c0_seq16	2555	-	sp|P32483|PABS_STRGR Para-aminobenzoate synthase OS=Streptomyces griseus GN=pab PE=3 SV=1	5e-87	gi|470146364|ref|XP_004308796.1| PREDICTED: para-aminobenzoate synthase-like [Fragaria vesca subsp. vesca]	0	B9HUE3_POPTR/658-916 B9HUE3.1 PF00425.13;Chorismate_bind;	9e-145	[J] Translation, ribosomal structure and biogenesis	-	-	GO:0046820(4-amino-4-deoxychorismate synthase activity);GO:0004049(anthranilate synthase activity);GO:0017000(antibiotic biosynthetic process);GO:0046656(folic acid biosynthetic process);GO:0006541(glutamine metabolic process)	-	-	-
comp112714_c0_seq19	2516	-	sp|P32483|PABS_STRGR Para-aminobenzoate synthase OS=Streptomyces griseus GN=pab PE=3 SV=1	6e-89	gi|470146364|ref|XP_004308796.1| PREDICTED: para-aminobenzoate synthase-like [Fragaria vesca subsp. vesca]	0	B9HUE3_POPTR/658-916 B9HUE3.1 PF00425.13;Chorismate_bind;	7e-145	[J] Translation, ribosomal structure and biogenesis	-	-	GO:0046820(4-amino-4-deoxychorismate synthase activity);GO:0004049(anthranilate synthase activity);GO:0017000(antibiotic biosynthetic process);GO:0046656(folic acid biosynthetic process);GO:0006541(glutamine metabolic process)	-	-	-
dihydropteroate synthase (DHPS)
comp113375_c0_seq4	2251	-	sp|P29251|FOL1_PNECA Folic acid synthesis protein fol1 OS=Pneumocystis carinii GN=fol1 PE=1 SV=1	5e-91	gi|470148603|ref|XP_004309846.1| PREDICTED: folic acid synthesis protein fol1-like [Fragaria vesca subsp. vesca]	0	F6HEZ6_VITVI/235-455 F6HEZ6.1 PF00809.17;Pterin_bind;	9e-124	[H] Coenzyme transport and metabolism	-	-	GO:0003848(2-amino-4-hydroxy-6-hydroxymethyldihydropteridine diphosphokinase activity);GO:0005524(ATP binding);GO:0004150(dihydroneopterin aldolase activity);GO:0004156(dihydropteroate synthase activity);GO:0016301(kinase activity);GO:0046872(metal ion binding);GO:0046656(folic acid biosynthetic process);GO:0046654(tetrahydrofolate biosynthetic process)	-	-	-
Folylpolyglutamate synthase
comp106139_c0_seq10	854	-	sp|F4J2K2|FPGS2_ARATH Folylpolyglutamate synthase OS=Arabidopsis thaliana GN=FPGS2 PE=1 SV=1	1e-65	gi|470135644|ref|XP_004303622.1| PREDICTED: folylpolyglutamate synthase-like [Fragaria vesca subsp. vesca]	1e-144	F6HLM9_VITVI/691-900 F6HLM9.1 PF08245.7;Mur_ligase_M;	7e-42	[H] Coenzyme transport and metabolism	-	-	-	-	-	-
comp106139_c0_seq14	2562	-	sp|F4J2K2|FPGS2_ARATH Folylpolyglutamate synthase OS=Arabidopsis thaliana GN=FPGS2 PE=1 SV=1	0	gi|470135644|ref|XP_004303622.1| PREDICTED: folylpolyglutamate synthase-like [Fragaria vesca subsp. vesca]	0	F6HLM9_VITVI/691-900 F6HLM9.1 PF08245.7;Mur_ligase_M;	1e-111	[H] Coenzyme transport and metabolism	-	-	-	-	-	-
comp106139_c0_seq15	485	-	-	-	gi|470135644|ref|XP_004303622.1| PREDICTED: folylpolyglutamate synthase-like [Fragaria vesca subsp. vesca]	2e-26	B9SVS7_RICCO/138-347 B9SVS7.1 PF08245.7;Mur_ligase_M;	1e-17	-	-	-	-	-	-	-
comp106139_c0_seq19	2615	-	sp|F4J2K2|FPGS2_ARATH Folylpolyglutamate synthase OS=Arabidopsis thaliana GN=FPGS2 PE=1 SV=1	1e-179	gi|470135644|ref|XP_004303622.1| PREDICTED: folylpolyglutamate synthase-like [Fragaria vesca subsp. vesca]	0	F6HLM9_VITVI/691-900 F6HLM9.1 PF08245.7;Mur_ligase_M;	5e-88	[H] Coenzyme transport and metabolism	-	-	-	-	-	-
comp106139_c0_seq20	2582	-	sp|F4J2K2|FPGS2_ARATH Folylpolyglutamate synthase OS=Arabidopsis thaliana GN=FPGS2 PE=1 SV=1	0	gi|470135644|ref|XP_004303622.1| PREDICTED: folylpolyglutamate synthase-like [Fragaria vesca subsp. vesca]	0	F6HLM9_VITVI/691-900 F6HLM9.1 PF08245.7;Mur_ligase_M;	5e-88	[H] Coenzyme transport and metabolism	-	-	-	-	-	-
comp106139_c0_seq6	874	-	sp|F4J2K2|FPGS2_ARATH Folylpolyglutamate synthase OS=Arabidopsis thaliana GN=FPGS2 PE=1 SV=1	2e-60	gi|470135644|ref|XP_004303622.1| PREDICTED: folylpolyglutamate synthase-like [Fragaria vesca subsp. vesca]	7e-117	F6HLM9_VITVI/691-900 F6HLM9.1 PF08245.7;Mur_ligase_M;	7e-30	[H] Coenzyme transport and metabolism	-	-	-	-	-	-
comp106139_c0_seq8	2595	-	sp|F4J2K2|FPGS2_ARATH Folylpolyglutamate synthase OS=Arabidopsis thaliana GN=FPGS2 PE=1 SV=1	0	gi|470135644|ref|XP_004303622.1| PREDICTED: folylpolyglutamate synthase-like [Fragaria vesca subsp. vesca]	0	F6HLM9_VITVI/691-900 F6HLM9.1 PF08245.7;Mur_ligase_M;	2e-111	[H] Coenzyme transport and metabolism	-	-	-	-	-	-
comp113267_c0_seq1	1735	-	-	-	gi|470144751|ref|XP_004308011.1| PREDICTED: folylpolyglutamate synthase-like [Fragaria vesca subsp. vesca]	0	E0CUK0_VITVI/80-325 E0CUK0.1 PF08245.7;Mur_ligase_M;	1e-114	[H] Coenzyme transport and metabolism	-	-	-	-	-	-
comp113267_c0_seq8	1513	-	-	-	gi|470144751|ref|XP_004308011.1| PREDICTED: folylpolyglutamate synthase-like [Fragaria vesca subsp. vesca]	0	E0CUK0_VITVI/80-325 E0CUK0.1 PF08245.7;Mur_ligase_M;	1e-115	[H] Coenzyme transport and metabolism	-	-	-	-	-	-
comp113399_c0_seq1	655	-	-	-	gi|470144751|ref|XP_004308011.1| PREDICTED: folylpolyglutamate synthase-like [Fragaria vesca subsp. vesca]	2e-88	B9RIM1_RICCO/96-341 B9RIM1.1 PF08245.7;Mur_ligase_M;	2e-34	[H] Coenzyme transport and metabolism	-	-	-	-	-	-
comp117056_c0_seq11	2338	-	sp|F4K2A1|FPGS1_ARATH Folylpolyglutamate synthase OS=Arabidopsis thaliana GN=FPGS1 PE=1 SV=1	0	gi|470143850|ref|XP_004307580.1| PREDICTED: folylpolyglutamate synthase-like [Fragaria vesca subsp. vesca]	0	I1M824_SOYBN/47-256 I1M824.1 PF08245.7;Mur_ligase_M;	2e-112	[H] Coenzyme transport and metabolism	-	-	-	-	-	-
comp117056_c0_seq14	2078	-	sp|F4K2A1|FPGS1_ARATH Folylpolyglutamate synthase OS=Arabidopsis thaliana GN=FPGS1 PE=1 SV=1	0	gi|470143850|ref|XP_004307580.1| PREDICTED: folylpolyglutamate synthase-like [Fragaria vesca subsp. vesca]	0	I1M824_SOYBN/47-256 I1M824.1 PF08245.7;Mur_ligase_M;	2e-113	[H] Coenzyme transport and metabolism	-	-	-	-	-	-
comp117056_c0_seq18	2015	-	sp|F4K2A1|FPGS1_ARATH Folylpolyglutamate synthase OS=Arabidopsis thaliana GN=FPGS1 PE=1 SV=1	0	gi|470143850|ref|XP_004307580.1| PREDICTED: folylpolyglutamate synthase-like [Fragaria vesca subsp. vesca]	0	I1M824_SOYBN/47-256 I1M824.1 PF08245.7;Mur_ligase_M;	1e-113	[H] Coenzyme transport and metabolism	-	-	-	-	-	-
comp117056_c0_seq20	478	-	-	-	gi|470143850|ref|XP_004307580.1| PREDICTED: folylpolyglutamate synthase-like [Fragaria vesca subsp. vesca]	5e-13	I1JI28_SOYBN/47-239 I1JI28.1 PF08245.7;Mur_ligase_M;	1e-12	-	-	-	-	-	-	-
comp117056_c0_seq5	897	-	sp|F4K2A1|FPGS1_ARATH Folylpolyglutamate synthase OS=Arabidopsis thaliana GN=FPGS1 PE=1 SV=1	6e-71	gi|470143850|ref|XP_004307580.1| PREDICTED: folylpolyglutamate synthase-like [Fragaria vesca subsp. vesca]	3e-111	I1M824_SOYBN/47-256 I1M824.1 PF08245.7;Mur_ligase_M;	2e-46	[H] Coenzyme transport and metabolism	-	-	-	-	-	-
comp117056_c0_seq6	2275	-	sp|F4K2A1|FPGS1_ARATH Folylpolyglutamate synthase OS=Arabidopsis thaliana GN=FPGS1 PE=1 SV=1	0	gi|470143850|ref|XP_004307580.1| PREDICTED: folylpolyglutamate synthase-like [Fragaria vesca subsp. vesca]	0	I1M824_SOYBN/47-256 I1M824.1 PF08245.7;Mur_ligase_M;	1e-112	[H] Coenzyme transport and metabolism	-	-	-	-	-	-
comp117478_c0_seq6	2212	-	sp|F4J2K2|FPGS2_ARATH Folylpolyglutamate synthase OS=Arabidopsis thaliana GN=FPGS2 PE=1 SV=1	5e-137	gi|470143850|ref|XP_004307580.1| PREDICTED: folylpolyglutamate synthase-like [Fragaria vesca subsp. vesca]	0	B9HT54_POPTR/67-316 B9HT54.1 PF08245.7;Mur_ligase_M;	5e-85	[H] Coenzyme transport and metabolism	-	-	-	-	-	-
comp97674_c0_seq2	216	-	-	-	gi|470143850|ref|XP_004307580.1| PREDICTED: folylpolyglutamate synthase-like [Fragaria vesca subsp. vesca]	3e-23	-	-	-	-	-	-	-	-	-
gamma-glutamyl hydrolase (GGH)
comp109108_c0_seq11	1438	gamma-glutamyl hydrolase	sp|O65355|GGH_ARATH Gamma-glutamyl hydrolase OS=Arabidopsis thaliana GN=GGH PE=1 SV=2	1e-119	gi|470115820|ref|XP_004294089.1| PREDICTED: gamma-glutamyl hydrolase-like [Fragaria vesca subsp. vesca]	0	B9SEV4_RICCO/99-315 B9SEV4.1 PF07722.8;Peptidase_C26;	5e-102	[H] Coenzyme transport and metabolism	vvi:100262251	6e-175	GO:0005618(cell wall);GO:0005615(extracellular space);GO:0005773(vacuole);GO:0034722(gamma-glutamyl-peptidase activity);GO:0006541(glutamine metabolic process);GO:0046900(tetrahydrofolylpolyglutamate metabolic process)	K01307	EC:3.4.19.9	ko00790(Folate biosynthesis)
comp109108_c0_seq20	1689	-	sp|O65355|GGH_ARATH Gamma-glutamyl hydrolase OS=Arabidopsis thaliana GN=GGH PE=1 SV=2	1e-99	gi|470115820|ref|XP_004294089.1| PREDICTED: gamma-glutamyl hydrolase-like [Fragaria vesca subsp. vesca]	0	B9SEV4_RICCO/99-315 B9SEV4.1 PF07722.8;Peptidase_C26;	6e-101	[H] Coenzyme transport and metabolism	-	-	GO:0005618(cell wall);GO:0005615(extracellular space);GO:0005773(vacuole);GO:0034722(gamma-glutamyl-peptidase activity);GO:0006541(glutamine metabolic process);GO:0046900(tetrahydrofolylpolyglutamate metabolic process)	-	-	-
comp109108_c0_seq25	1168	gamma-glutamyl hydrolase	sp|O65355|GGH_ARATH Gamma-glutamyl hydrolase OS=Arabidopsis thaliana GN=GGH PE=1 SV=2	1e-103	gi|470115820|ref|XP_004294089.1| PREDICTED: gamma-glutamyl hydrolase-like [Fragaria vesca subsp. vesca]	6e-177	B9SEV4_RICCO/99-315 B9SEV4.1 PF07722.8;Peptidase_C26;	7e-128	[H] Coenzyme transport and metabolism	vvi:100262251	2e-141	GO:0005618(cell wall);GO:0005615(extracellular space);GO:0005773(vacuole);GO:0034722(gamma-glutamyl-peptidase activity);GO:0006541(glutamine metabolic process);GO:0046900(tetrahydrofolylpolyglutamate metabolic process)	K01307	EC:3.4.19.9	ko00790(Folate biosynthesis)
comp109108_c0_seq6	1073	-	sp|O65355|GGH_ARATH Gamma-glutamyl hydrolase OS=Arabidopsis thaliana GN=GGH PE=1 SV=2	1e-102	gi|470115820|ref|XP_004294089.1| PREDICTED: gamma-glutamyl hydrolase-like [Fragaria vesca subsp. vesca]	5e-177	B9SEV4_RICCO/99-315 B9SEV4.1 PF07722.8;Peptidase_C26;	2e-128	[H] Coenzyme transport and metabolism	-	-	GO:0005618(cell wall);GO:0005615(extracellular space);GO:0005773(vacuole);GO:0034722(gamma-glutamyl-peptidase activity);GO:0006541(glutamine metabolic process);GO:0046900(tetrahydrofolylpolyglutamate metabolic process)	-	-	-
comp109108_c0_seq8	1505	gamma-glutamyl hydrolase	sp|O65355|GGH_ARATH Gamma-glutamyl hydrolase OS=Arabidopsis thaliana GN=GGH PE=1 SV=2	1e-100	gi|470115820|ref|XP_004294089.1| PREDICTED: gamma-glutamyl hydrolase-like [Fragaria vesca subsp. vesca]	0	B9SEV4_RICCO/99-315 B9SEV4.1 PF07722.8;Peptidase_C26;	1e-101	[H] Coenzyme transport and metabolism	vvi:100262251	1e-144	GO:0005618(cell wall);GO:0005615(extracellular space);GO:0005773(vacuole);GO:0034722(gamma-glutamyl-peptidase activity);GO:0006541(glutamine metabolic process);GO:0046900(tetrahydrofolylpolyglutamate metabolic process)	K01307	EC:3.4.19.9	ko00790(Folate biosynthesis)
UDP-glycosyltransferase
comp108959_c0_seq2	1676	-	sp|O22822|U74F2_ARATH UDP-glycosyltransferase 74F2 OS=Arabidopsis thaliana GN=UGT74F2 PE=1 SV=1	3e-125	gi|470106824|ref|XP_004289758.1| PREDICTED: UDP-glycosyltransferase 74E1-like [Fragaria vesca subsp. vesca]	0	B9T2H3_RICCO/12-436 B9T2H3.1 PF00201.13;UDPGT;	0	[G] Carbohydrate transport and metabolism ;[C] Energy production and conversion	-	-	GO:0052641(benzoic acid glucosyltransferase activity);GO:0052639(salicylic acid glucosyltransferase (ester-forming) activity);GO:0052640(salicylic acid glucosyltransferase (glucoside-forming) activity);GO:0080002(UDP-glucose:4-aminobenzoate acylglucosyltransferase activity);GO:0018874(benzoate metabolic process);GO:0046482(para-aminobenzoic acid metabolic process);GO:0009696(salicylic acid metabo…	-	-	-
comp110412_c0_seq5	1596	-	sp|Q9LR44|U75B1_ARATH UDP-glycosyltransferase 75B1 OS=Arabidopsis thaliana GN=UGT75B1 PE=1 SV=1	6e-84	gi|470121941|ref|XP_004297014.1| PREDICTED: UDP-glycosyltransferase 75D1-like [Fragaria vesca subsp. vesca]	2e-152	F8WKW0_9GENT/187-443 F8WKW0.1 PF00201.13;UDPGT;	3e-81	[G] Carbohydrate transport and metabolism ;[C] Energy production and conversion	-	-	GO:0005856(cytoskeleton);GO:0048471(perinuclear region of cytoplasm);GO:0009524(phragmoplast);GO:0047215(indole-3-acetate beta-glucosyltransferase activity);GO:0005515(protein binding);GO:0080002(UDP-glucose:4-aminobenzoate acylglucosyltransferase activity);GO:0009920(cell plate formation involved in plant-type cell wall biogenesis);GO:0046482(para-aminobenzoic acid metabolic process);GO:0009751(…	-	-	-
comp47969_c0_seq1	514	-	sp|O22822|U74F2_ARATH UDP-glycosyltransferase 74F2 OS=Arabidopsis thaliana GN=UGT74F2 PE=1 SV=1	7e-36	gi|470107555|ref|XP_004290110.1| PREDICTED: UDP-glycosyltransferase 74F2-like [Fragaria vesca subsp. vesca]	3e-62	B6EWX8_LYCBA/8-436 B6EWX8.1 PF00201.13;UDPGT;	4e-38	-	-	-	GO:0052641(benzoic acid glucosyltransferase activity);GO:0052639(salicylic acid glucosyltransferase (ester-forming) activity);GO:0052640(salicylic acid glucosyltransferase (glucoside-forming) activity);GO:0080002(UDP-glucose:4-aminobenzoate acylglucosyltransferase activity);GO:0018874(benzoate metabolic process);GO:0046482(para-aminobenzoic acid metabolic process);GO:0009696(salicylic acid metabo…	-	-	-
comp69824_c0_seq1	325	-	sp|O22822|U74F2_ARATH UDP-glycosyltransferase 74F2 OS=Arabidopsis thaliana GN=UGT74F2 PE=1 SV=1	4e-29	gi|470147369|ref|XP_004309287.1| PREDICTED: UDP-glycosyltransferase 74F2-like, partial [Fragaria vesca subsp. vesca]	3e-73	A5BTJ4_VITVI/12-431 A5BTJ4.1 PF00201.13;UDPGT;	2e-30	[G] Carbohydrate transport and metabolism ;[C] Energy production and conversion	-	-	GO:0052641(benzoic acid glucosyltransferase activity);GO:0052639(salicylic acid glucosyltransferase (ester-forming) activity);GO:0052640(salicylic acid glucosyltransferase (glucoside-forming) activity);GO:0080002(UDP-glucose:4-aminobenzoate acylglucosyltransferase activity);GO:0018874(benzoate metabolic process);GO:0046482(para-aminobenzoic acid metabolic process);GO:0009696(salicylic acid metabo…	-	-	-
